# Supplementary material for: Regioselective arene homologation through rhenium-catalyzed deoxygenative aromatization of 7-oxabicyclo[2.2.1]hepta-2,5-dienes
Source: Royal Society of Chemistry journal article supplement (doi:10.1039/c9cc00270g), 2019-01-01

## Electronic Supplementary Information

### Regioselective Arene Homologation through Rhenium-Catalyzed Deoxygenative Aromatization of 7-Oxabicyclo[2.2.1]hepta-2,5-diene

Masahito Murai,\* Takuya Ogita, and Kazuhiko Takai\*

*Division of Applied Chemistry, Graduate School of Natural Science and Technology,  
Okayama University, 3-1-1 Tsushimanaka, Kita-ku, Okayama 700-8530, Japan.*

E-mail: [masahito.murai@okayama-u.ac.jp](mailto:masahito.murai@okayama-u.ac.jp)  
[ktakai@cc.okayama-u.ac.jp](mailto:ktakai@cc.okayama-u.ac.jp)

#### Table of Contents

|                                                                                                           |     |
|-----------------------------------------------------------------------------------------------------------|-----|
| 1. General Methods                                                                                        | S2  |
| 2. Preparation of Dimethyl 1,4-Diphenyl-1,4-dihydro-1,4-epoxy-naphthalene-2,3-dicarboxylate ( <b>1j</b> ) | S2  |
| 3. General Procedure for Rhenium-Catalyzed Deoxygenation of 7-Oxabicyclo[2.2.1]heptadiene Derivatives     | S6  |
| 4. Regioselective Benzannulative $\pi$ -Extension of PAHs                                                 | S10 |
| 5. Optimization of Reaction Conditions                                                                    | S16 |
| 6. Tolerance of Functional Groups in Deoxygenative Aromatization of <b>1a</b>                             | S17 |
| 7. Plausible Reaction Mechanism                                                                           | S17 |
| 8. Comparison with the Reported Deoxygenation Protocols                                                   | S18 |
| 9. References                                                                                             | S19 |
| 10. X-ray Crystallographic Studies of Isomerized Product <b>3j</b>                                        | S20 |
| 11. $^1\text{H}$ NMR and $^{13}\text{C}$ -NMR Spectra of Products                                         | S22 |

**1. General Methods.** All reactions were carried out in dry solvent under an argon atmosphere. Unless otherwise noted, other chemicals obtained from commercial suppliers were used without further purification. Toluene was purchased from Wako Pure Chemical Industries, and was dried by the usual methods and degassed with an argon gas for 20 min before use. Column chromatography was performed with silica gel 60N (neutral, 40-50  $\mu\text{m}$ ) purchased from Kanto Chemical.  $\text{NH}_4\text{ReO}_4$ ,  $\text{Re}_2\text{O}_7$ , and  $\text{P}(\text{OPh})_3$  were purchased from Wako, Sigma-Aldrich, and Tokyo Chemical Industry, respectively. 7-Oxabicyclo-[2.2.1]heptadiene derivatives **1a**,<sup>1</sup> **1b**,<sup>2</sup> **1c**,<sup>3</sup> **1d**,<sup>4</sup> **1e**,<sup>5</sup> **1f**,<sup>6</sup> **1g**,<sup>7</sup> **1h**,<sup>8</sup> **1i**,<sup>8,9</sup> and **1k**<sup>10</sup> were synthesized according to the reported methods.  $^1\text{H}$  (400 or 300 MHz) and  $^{13}\text{C}$  (100 MHz) NMR spectra were recorded on a JEOL JNN-LA400 spectrometer. Proton chemical shifts are reported in ppm based on the solvent resonance resulting from incomplete deuteration ( $\text{CDCl}_3$  at 7.26 ppm) as the internal standard.  $^{13}\text{C}$  NMR was recorded with complete proton decoupling and the chemical shifts are reported relative to  $\text{CDCl}_3$  at 77.00 ppm. The following abbreviations are used; s: singlet, d: doublet, t: triplet, q: quartet, sept: septet, m: multiplet. IR spectra were recorded on a SHIMADZU IRAFFINITY-1 100V J. High-resolution mass spectra (HRMS) was measured with JEOL JMS-700 MStation FAB-MS.

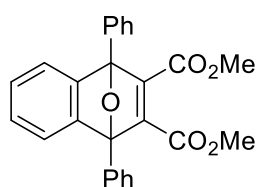

**2. Preparation of Dimethyl 1,4-Diphenyl-1,4-dihydro-1,4-epoxynaphthalene-2,3-dicarboxylate (1j).** To a stirred solution of 1,3-diphenylisobenzofuran<sup>11</sup> (540.7 mg, 2.0 mmol) in toluene (10 mL) was added dimethyl acetylenedicarboxylate (625.2 mg, 4.4 mmol), and the resulting mixture was stirred at reflux for 3 h. The solvent was removed under the reduced pressure, and the residue was subjected to flash column chromatography on silica gel with hexane / EtOAc ( $v/v = 10/1$ ) as the eluent to afford dimethyl 1,4-diphenyl-1,4-dihydro-1,4-epoxynaphthalene-2,3-dicarboxylate (**1j**) as a colorless solid (593.9 mg, 1.4 mmol, 72% yield).

m.p. 156.8-157.4 °C.  $^1\text{H}$  NMR (400 MHz,  $\text{CDCl}_3$ ):  $\delta$  3.69 (s, 6H), 7.14-7.18 (m, 2H), 7.38-7.52 (m, 6H), 7.54-7.57 (m, 2H), 7.79 (d,  $J = 7.6$  Hz, 4H).  $^{13}\text{C}$  NMR (100 MHz,  $\text{CDCl}_3$ ):  $\delta$  52.3, 94.0, 122.2, 126.0, 128.0, 128.6, 129.0, 133.1, 149.1, 153.9, 164.1. IR (KBr /  $\text{cm}^{-1}$ ): 3073, 3034, 3009, 2955, 1721, 1638, 1501, 1456, 1435, 1317, 1294, 1256, 1192, 1128, 1006, 982, 773, 748. HRMS (FAB $^+$ ): calcd for  $\text{C}_{26}\text{H}_{21}\text{O}_5$  ( $[\text{M}+\text{H}]^+$ ) 413.1384; found. 413.1375.

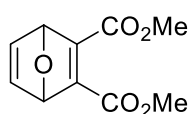

**Dimethyl 7-oxabicyclo[2.2.1]hepta-2,5-diene-2,3-dicarboxylate (1a):** Colorless oil;  $^1\text{H}$  NMR (400 MHz,  $\text{CDCl}_3$ ):  $\delta$  3.82 (s, 6H), 5.68 (s, 2H), 7.22 (s, 2H).  $^{13}\text{C}$  NMR (100 MHz,  $\text{CDCl}_3$ ):  $\delta$  52.4, 85.1, 143.2, 152.9, 163.2. HRMS (FAB $^+$ ): calcd for  $\text{C}_{10}\text{H}_{11}\text{O}_5$  ( $[\text{M}+\text{H}]^+$ ) 211.0601; found. 211.0610. The analytical data match those reported in the literature.<sup>1</sup>

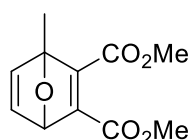

**Dimethyl 1-methyl-7-oxabicyclo[2.2.1]hepta-2,5-diene-2,3-dicarboxylate (1b):** Colorless oil;  $^1\text{H}$  NMR (400 MHz,  $\text{CDCl}_3$ ):  $\delta$  1.79 (s, 3H), 3.78 (s, 3H), 3.85 (s, 3H), 5.60 (d,  $J = 2.0$  Hz, 1H), 6.98 (d,  $J = 5.6$  Hz, 1H), 7.18 (dd,  $J = 2.0, 5.6$  Hz, 1H).  $^{13}\text{C}$  NMR (100 MHz,  $\text{CDCl}_3$ ):  $\delta$  15.1, 52.2, 52.3, 83.3, 93.8, 144.6, 145.9, 151.2, 156.5, 162.8, 164.9. HRMS (FAB $^+$ ): calcd for  $\text{C}_{11}\text{H}_{13}\text{O}_5$  ( $[\text{M}+\text{H}]^+$ ) 225.0757; found. 225.0761. The analytical data match those reported in the literature.<sup>2</sup>

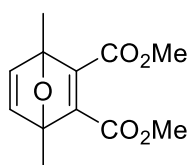

**Dimethyl 1,4-dimethyl-7-oxabicyclo[2.2.1]hepta-2,5-diene-2,3-dicarboxylate (1c):** Colorless oil;  $^1\text{H}$  NMR (400 MHz,  $\text{CDCl}_3$ ):  $\delta$  1.79 (s, 6H), 3.79 (s, 6H), 6.95 (s, 2H).  $^{13}\text{C}$  NMR (100 MHz,  $\text{CDCl}_3$ ):  $\delta$  15.3, 52.1, 92.0, 147.2, 154.8, 164.3. HRMS (FAB $^+$ ): calcd for  $\text{C}_{12}\text{H}_{15}\text{O}_5$  ( $[\text{M}+\text{H}]^+$ ) 239.0914; found. 239.0921. The analytical data match those reported in the literature.<sup>3</sup>

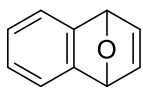

**1,4-Dihydro-1,4-epoxynaphthalene (1d):** Colorless solid;  $^1\text{H}$  NMR (400 MHz,  $\text{CDCl}_3$ ):  $\delta$  5.71 (s, 2H), 6.97 (dd,  $J = 2.8, 5.2$  Hz, 2H), 7.03 (s, 2H), 7.25 (dd,  $J = 2.8, 5.2$  Hz, 2H). The analytical data match those reported in the literature.<sup>4</sup>

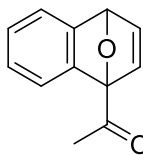

**1-Acetyl-1,4-dihydro-1,4-epoxynaphthalene (1e):** Colorless oil;  $^1\text{H}$  NMR (400 MHz,  $\text{CDCl}_3$ ):  $\delta$  2.40 (s, 3H), 5.80 (d,  $J = 2.0$  Hz, 1H), 6.96-7.03 (m, 3H), 7.03-7.07 (m, 1H), 7.24-7.29 (m, 2H).  $^{13}\text{C}$  NMR (100 MHz,  $\text{CDCl}_3$ ):  $\delta$  26.8, 82.3, 95.7, 119.5, 120.5, 125.2, 125.6, 142.2, 143.4, 147.4, 148.0, 205.2. HRMS (FAB<sup>+</sup>): calcd for  $\text{C}_{12}\text{H}_{11}\text{O}_2$  ( $[\text{M}+\text{H}]^+$ ) 187.0754; found. 187.0749. The analytical data match those reported in the literature.<sup>5</sup>

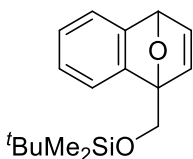

**1-[(*tert*-Butyldimethylsilyloxy)methyl]-1,4-dihydro-1,4-epoxynaphthalene (1f):** Colorless oil;  $^1\text{H}$  NMR (400 MHz,  $\text{CDCl}_3$ ):  $\delta$  0.17 (s, 6H), 0.97 (s, 9H), 4.33 (d,  $J = 10.8$  Hz, 1H), 4.48 (d,  $J = 10.8$  Hz, 1H), 5.69 (d,  $J = 1.5$  Hz, 1H), 6.96-6.99 (m, 3H), 7.04 (dd,  $J = 1.5, 5.6$  Hz, 1H), 7.21-7.24 (m, 1H), 7.27-7.30 (m, 1H).  $^{13}\text{C}$  NMR (100 MHz,  $\text{CDCl}_3$ ):  $\delta$  -5.4, 18.4, 25.9, 61.5, 82.1, 92.7, 119.8 (overlapped), 124.8, 124.9, 143.1, 143.8, 149.4, 150.5. HRMS (FAB<sup>+</sup>): calcd for  $\text{C}_{17}\text{H}_{25}\text{O}_2\text{Si}$  ( $[\text{M}+\text{H}]^+$ ) 289.1618; found. 289.1610. The analytical data match those reported in the literature.<sup>6</sup>

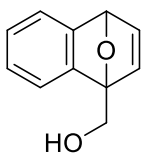

**1-(Hydroxymethyl)-1,4-dihydro-1,4-epoxynaphthalene (1f'):** Colorless solid;  $^1\text{H}$  NMR (400 MHz,  $\text{CDCl}_3$ ):  $\delta$  1.57 (br s, 1H), 4.44 (d,  $J = 12.8$  Hz, 1H), 4.48 (d,  $J = 12.8$  Hz, 1H), 5.73 (d,  $J = 2.0$  Hz, 1H), 6.89 (d,  $J = 5.6$  Hz, 1H), 6.98-7.01 (m, 2H), 7.09 (dd,  $J = 1.6, 5.6$  Hz, 1H), 7.17-7.20 (m, 1H), 7.24-7.26 (m, 1H).  $^{13}\text{C}$  NMR (100 MHz,  $\text{CDCl}_3$ ):  $\delta$  60.3, 82.1, 93.6, 119.5, 120.2, 125.0, 125.1, 142.3, 144.9, 147.7, 150.4. HRMS (FAB<sup>+</sup>): calcd for  $\text{C}_{11}\text{H}_{11}\text{O}_2$  ( $[\text{M}+\text{H}]^+$ ) 175.0754; found.

175.0747. The analytical data match those reported in the literature.<sup>6a</sup>

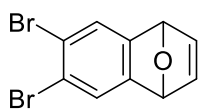

**6,7-Dibromo-1,4-dihydro-1,4-epoxynaphthalene (1g):** Colorless solid;

<sup>1</sup>H NMR (400 MHz, CDCl<sub>3</sub>):  $\delta$  5.66 (s, 2H), 6.99 (s, 2H), 7.47 (s, 2H).

<sup>13</sup>C NMR (100 MHz, CDCl<sub>3</sub>):  $\delta$  81.8, 120.6, 125.5, 142.7, 150.2. HRMS (FAB<sup>+</sup>): calcd for C<sub>10</sub>H<sub>6</sub>Br<sub>2</sub>O ([M]<sup>+</sup>) 299.8785; found. 299.8747. The analytical data match those reported in the literature.<sup>7</sup>

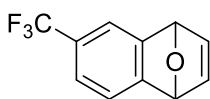

**6-(Trifluoromethyl)-1,4-dihydro-1,4-epoxynaphthalene (1h):** Pale

yellow oil; <sup>1</sup>H NMR (400 MHz, CDCl<sub>3</sub>):  $\delta$  5.85 (d,  $J$  = 2.0 Hz, 2H), 7.13

(dd,  $J$  = 2.0, 5.6 Hz, 1H), 7.15 (dd,  $J$  = 2.0, 5.6 Hz, 1H), 7.38 (d,  $J$  = 7.6 Hz, 1H), 7.42 (d,  $J$  = 7.6 Hz, 1H), 7.55 (s, 1H). <sup>13</sup>C NMR (100 MHz, CDCl<sub>3</sub>):  $\delta$  82.1 (two peaks overlapped), 116.8 (q,  $J$  = 3.3 Hz), 120.0, 123.0 (q,  $J$  = 3.8 Hz), 124.2 (q,  $J$  = 270.8 Hz), 127.4 (q,  $J$  = 32.5 Hz), 142.7, 143.1, 150.3, 153.2. HRMS (FAB<sup>+</sup>): calcd for C<sub>11</sub>H<sub>8</sub>F<sub>3</sub>O ([M+H]<sup>+</sup>) 213.0522; found. 213.0522. The analytical data match those reported in the literature.<sup>8</sup>

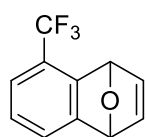

**5-Trifluoromethyl-1,4-dihydro-1,4-epoxynaphthalene (1i):** Colorless oil;

<sup>1</sup>H NMR (400 MHz, CDCl<sub>3</sub>):  $\delta$  5.78 (s, 1H), 6.01 (s, 1H), 7.04 (dd,  $J$  = 2.0, 5.6 Hz, 1H), 7.07 (dd,  $J$  = 2.0, 5.6 Hz, 1H), 7.09 (t,  $J$  = 6.8 Hz, 1H), 7.18 (d,  $J$

= 6.8 Hz, 1H), 7.39 (d,  $J$  = 6.8 Hz, 1H). <sup>13</sup>C NMR (100 MHz, CDCl<sub>3</sub>):  $\delta$  81.5, 81.9, 121.1 (q,  $J$  = 4.8 Hz), 123.0, 123.6 (q,  $J$  = 33.4 Hz), 123.9 (q,  $J$  = 275.5 Hz), 125.6, 142.4, 143.6, 148.0, 150.5. HRMS (FAB<sup>+</sup>): calcd for C<sub>11</sub>H<sub>8</sub>F<sub>3</sub>O ([M+H]<sup>+</sup>) 213.0522; found. 213.0524. The analytical data match those reported in the literature.<sup>9</sup>

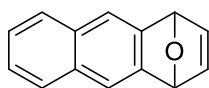

**1,4-Dihydro-1,4-epoxyanthracene (1k):** Colorless solid;  $^1\text{H}$  NMR (400 MHz,  $\text{CDCl}_3$ ):  $\delta$  5.81 (s, 2H), 6.97 (s, 2H), 7.43 (dd,  $J = 3.2, 6.0$  Hz, 2H), 7.59 (s, 2H), 7.71 (dd,  $J = 3.2, 6.0$  Hz, 2H).  $^{13}\text{C}$  NMR (100 MHz,  $\text{CDCl}_3$ ):  $\delta$  81.8, 118.6, 126.1, 128.1, 131.9, 141.7, 144.1. HRMS (FAB $^+$ ): calcd for  $\text{C}_{14}\text{H}_{10}\text{O}$  ( $[\text{M}]^+$ ) 194.0732; found. 194.0743. The analytical data match those reported in the literature.<sup>10</sup>

**3. General Procedure for Rhenium-Catalyzed Deoxygenation of 7-Oxabicyclo[2.2.1]-heptadiene Derivatives.** A flame-dried test tube was charged with  $\text{Re}_2\text{O}_7$  (1.8 mg, 3.75  $\mu\text{mol}$ ) or  $\text{NH}_4\text{ReO}_4$  (2.0 mg, 7.5  $\mu\text{mol}$ ),  $\text{P}(\text{OPh})_3$  (111.7 mg, 0.36 mmol) and toluene (0.90 mL). After stirring for 10 min, 7-oxabicyclo[2.2.1]heptadiene derivatives **1** (0.30 mmol) was added, and further stirred at the temperature specified in the text for 18 h. The solvent was removed under the reduced pressure, and the residue was subjected to flash column chromatography on silica gel with hexane / EtOAc as eluents to afford the corresponding aromatic compounds.

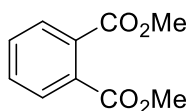

**Dimethyl phthalate (2a):** Colorless oil;  $^1\text{H}$  NMR (400 MHz,  $\text{CDCl}_3$ ):  $\delta$  3.89 (s, 6H), 7.50-7.54 (m, 2H), 7.69-7.72 (m, 2H).  $^{13}\text{C}$  NMR (100 MHz,  $\text{CDCl}_3$ ):  $\delta$  52.6, 128.8, 131.1, 131.9, 168.0. HRMS (FAB $^+$ ): calcd for  $\text{C}_{10}\text{H}_{11}\text{O}_4$  ( $[\text{M}+\text{H}]^+$ ) 195.0657; found. 195.0655. The analytical data match those reported in the literature (P. Dawar, M. Bhagavan Raju, R. A. Ramakrishana, *Tetrahedron Lett.* 2011, **52**, 4262).

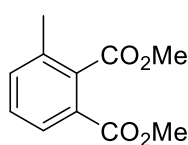

**Dimethyl 3-methylphthalate (2b):** Colorless oil;  $^1\text{H}$  NMR (400 MHz,  $\text{CDCl}_3$ ):  $\delta$  2.33 (s, 3H), 3.87 (s, 3H), 3.93 (s, 3H), 7.31-7.41 (m, 2H), 7.79-7.83 (m, 1H).  $^{13}\text{C}$  NMR (100 MHz,  $\text{CDCl}_3$ ):  $\delta$  18.9, 52.4, 52.5, 127.2, 127.4, 129.0, 134.4, 135.3, 135.7, 166.3, 169.9. IR (neat /  $\text{cm}^{-1}$ ): 3001, 2953, 1732, 1595, 1456, 1435, 1282, 1198, 1153, 1117, 1022, 960, 767. HRMS (FAB $^+$ ): calcd for  $\text{C}_{11}\text{H}_{13}\text{O}_4$

$([M+H]^+)$  209.0808; found. 209.0830.

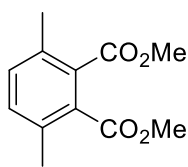

**Dimethyl 3,6-dimethylphthalate (2c):** Colorless oil;  $^1\text{H}$  NMR (400 MHz,  $\text{CDCl}_3$ ):  $\delta$  2.38 (s, 6H), 3.87 (s, 6H), 7.19 (s, 2H).  $^{13}\text{C}$  NMR (100 MHz,  $\text{CDCl}_3$ ):  $\delta$  19.8, 52.2, 131.7, 132.5, 134.3, 168.9. IR (neat /  $\text{cm}^{-1}$ ): 3022,

2953, 1732, 1589, 1489, 1435, 1402, 1294, 1263, 1203, 1161, 1111, 1036, 962, 756.

HRMS (FAB $^+$ ): calcd for  $\text{C}_{12}\text{H}_{15}\text{O}_4$  ( $[M+H]^+$ ) 223.0965; found. 223.0946.

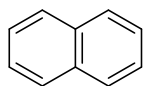

**Naphthalene (2d) [CAS 91-20-3]:** Colorless solid;  $^1\text{H}$  NMR (400 MHz,  $\text{CDCl}_3$ ):  $\delta$  7.51 (dd,  $J = 3.2, 6.4$  Hz, 4H), 7.87 (dd,  $J = 3.2, 6.4$  Hz, 2H).  $^{13}\text{C}$

NMR (100 MHz,  $\text{CDCl}_3$ ):  $\delta$  126.0, 127.9, 133.4. The analytical data match those measured for commercial sample.

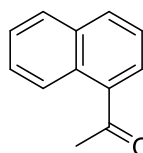

**1-Acetylnaphthalene (2e):** Colorless oil;  $^1\text{H}$  NMR (400 MHz,  $\text{CDCl}_3$ ):  $\delta$  2.75 (s, 3H), 7.50 (t,  $J = 7.6$  Hz, 1H), 7.54 (t,  $J = 7.6$  Hz, 1H), 7.61 (dt,  $J = 1.2, 7.6$  Hz, 1H), 7.88 (d,  $J = 8.4$  Hz, 1H), 7.94 (dd,  $J = 2.0, 7.6$  Hz, 1H),

7.99 (d,  $J = 8.4$  Hz, 1H), 8.76 (d,  $J = 8.4$  Hz, 1H).  $^{13}\text{C}$  NMR (100 MHz,  $\text{CDCl}_3$ ):  $\delta$  29.9,

124.3, 126.0, 126.4, 128.0, 128.4, 128.6, 130.1, 133.0, 133.9, 135.4, 201.8. HRMS (FAB $^+$ ):

calcd for  $\text{C}_{12}\text{H}_{11}\text{O}$  ( $[M+H]^+$ ) 171.0810; found. 171.0805. The analytical data match those reported in the literature (J. Ruan, J. A. Iggo, N. G. Berry, J. Xiao, *J. Am. Chem. Soc.* 2010,

**132**, 16689).

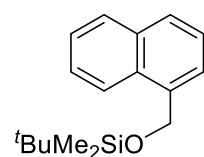

**1-[(*tert*-Butyldimethylsilyloxy)methyl]naphthalene (2f):** Colorless oil;

$^1\text{H}$  NMR (400 MHz,  $\text{CDCl}_3$ ):  $\delta$  0.16 (s, 6H), 0.99 (s, 9H), 5.24 (s, 2H), 7.46-7.57 (m, 3H), 7.62 (d,  $J = 6.8$  Hz, 1H), 7.79 (d,  $J = 8.4$  Hz, 1H),

7.89 (dd,  $J = 2.0, 7.2$  Hz, 1H), 8.02 (dd,  $J = 2.0, 7.2$  Hz, 1H).  $^{13}\text{C}$  NMR (100 MHz,

CDCl<sub>3</sub>):  $\delta$ -5.2, 18.4, 26.0, 63.4, 123.3, 123.7, 125.4, 125.5, 125.8, 127.5, 128.6, 130.8, 133.5, 136.7. HRMS (FAB<sup>+</sup>): calcd for C<sub>17</sub>H<sub>25</sub>OSi ([M+H]<sup>+</sup>) 273.1675; found. 273.1654. The analytical data match those reported in the literature (P. Patschinski, C. Zhang, H. Zipse, *J. Org. Chem.* 2014, **79**, 8348).

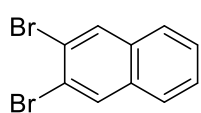

**2,3-Dibromonaphthalene (2g)**: Colorless solid; <sup>1</sup>H NMR (400 MHz, CDCl<sub>3</sub>):  $\delta$ 7.50-7.53 (m, 2H), 7.72-7.75 (m, 2H), 8.15 (s, 2H). <sup>13</sup>C NMR (100 MHz, CDCl<sub>3</sub>):  $\delta$ 122.1, 127.0, 127.3, 132.4, 133.2. HRMS (FAB<sup>+</sup>): calcd for C<sub>10</sub>H<sub>6</sub>Br<sub>2</sub> ([M]<sup>+</sup>) 283.8836; found. 283.8851. The analytical data match those reported in the literature (G. London, M. von Wantoch Rekowski, O. Dumele, W. B. Schweizer, J.-P. Gisselbrecht, C. Boudon, F. Diederich, *Chem. Sci.* 2014, **5**, 965).

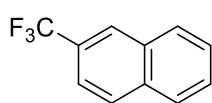

**2-(Trifluoromethyl)naphthalene (2h)**: Colorless oil; <sup>1</sup>H NMR (400 MHz, CDCl<sub>3</sub>):  $\delta$ 7.59 (dd, *J* = 1.6, 5.6 Hz, 1H), 7.62 (dd, *J* = 1.6, 5.6 Hz, 1H), 7.65 (dd, *J* = 1.6, 8.4 Hz, 1H), 7.89-7.93 (m, 2H), 7.96 (d, *J* = 8.4 Hz, 1H), 8.16 (s, 1H). <sup>13</sup>C NMR (100 MHz, CDCl<sub>3</sub>):  $\delta$ 124.4 (q, *J* = 3.1 Hz), 125.7 (q, *J* = 4.6 Hz), 127.1, 127.5 (q, *J* = 30.0 Hz), 127.8, 128.0, 128.8, 128.9 (q, *J* = 276.9 Hz), 129.0, 132.2, 134.5. HRMS (FAB<sup>+</sup>): calcd for C<sub>11</sub>H<sub>8</sub>F<sub>3</sub> ([M+H]<sup>+</sup>) 197.0578; found. 197.0577. The analytical data match those reported in the literature (T. Liu, Q. Shen, *Org. Lett.* 2011, **13**, 2342).

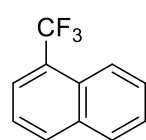

**1-(Trifluoromethyl)naphthalene (2i)**: Colorless solid; <sup>1</sup>H NMR (400 MHz, CDCl<sub>3</sub>):  $\delta$ 7.51 (t, *J* = 7.6 Hz, 1H), 7.58 (dt, *J* = 1.2, 8.0 Hz, 1H), 7.64 (dd, *J* = 1.2, 8.0 Hz, 1H), 7.88 (d, *J* = 7.2 Hz, 1H), 7.93 (d, *J* = 7.2 Hz, 1H), 8.03 (d, *J* = 8.0 Hz, 1H), 8.20 (d, *J* = 8.0 Hz, 1H). <sup>13</sup>C NMR (100 MHz, CDCl<sub>3</sub>):  $\delta$ 124.1, 124.2 (q, *J* = 2.3 Hz), 124.7 (q, *J* = 6.1 Hz), 124.8 (q, *J* = 271.7 Hz), 126.0 (q, *J* = 24.8 Hz), 126.6, 127.6, 128.7, 128.9, 132.7, 133.9. HRMS (FAB<sup>+</sup>): calcd for C<sub>11</sub>H<sub>8</sub>F<sub>3</sub> ([M+H]<sup>+</sup>) 197.0578;



found. 197.0560. The analytical data match those reported in the literature (J. Xu, D.-F. Luo, B. Xiao, Z.-J. Liu, T.-J. Gong, Y. Fu, L. Liu, *Chem. Commun.* 2011, **47**, 4300).

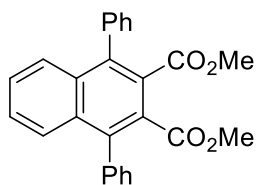

**Dimethyl 1,4-diphenylnaphthalene-2,3-dicarboxylate (2j):**

Colorless solid;  $^1\text{H}$  NMR (400 MHz,  $\text{CDCl}_3$ ):  $\delta$  3.51 (s, 6H), 7.36-7.41 (m, 4H), 7.42-7.52 (m, 8H), 7.62-7.67 (dd,  $J = 2.8, 6.8$  Hz,

2H).  $^{13}\text{C}$  NMR (100 MHz,  $\text{CDCl}_3$ ):  $\delta$  52.2, 127.4, 127.6, 127.9, 128.1, 128.7, 129.9, 132.7, 137.5, 139.1, 168.9. HRMS ( $\text{FAB}^+$ ): calcd for  $\text{C}_{26}\text{H}_{20}\text{O}_4$  ( $[\text{M}]^+$ ) 396.1362; found. 396.1367.

The analytical data match those reported in the literature.<sup>11b</sup>

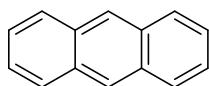

**Anthracene (2k) [CAS 120-12-7]:** Colorless solid;  $^1\text{H}$  NMR (400 MHz,  $\text{CDCl}_3$ ):  $\delta$  7.47 (dd,  $J = 3.2, 6.4$  Hz, 4H), 8.01 (dd,  $J = 3.2, 6.4$  Hz, 4H),

8.43 (s, 2H).  $^{13}\text{C}$  NMR (100 MHz,  $\text{CDCl}_3$ ):  $\delta$  125.5, 126.3, 128.3, 131.8. The analytical data match those measured for commercial sample.

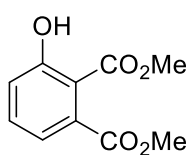

**Dimethyl 3-hydroxyphthalate (3a):** Colorless oil;  $^1\text{H}$  NMR (400 MHz,  $\text{CDCl}_3$ ):  $\delta$  3.88 (s, 3H), 3.91 (s, 3H), 6.95 (dd,  $J = 1.2, 7.2$  Hz, 1H), 7.07 (dd,  $J = 1.2, 7.6$  Hz, 1H), 7.44 (dt,  $J = 1.2, 7.6$  Hz, 1H), 10.5 (s, 1H).  $^{13}\text{C}$

NMR (100 MHz,  $\text{CDCl}_3$ ):  $\delta$  52.6, 52.8, 110.1, 119.0, 119.8, 134.5, 135.4, 161.0, 169.3, 169.4. IR (neat /  $\text{cm}^{-1}$ ): 3401, 2955, 1732, 1681, 1605, 1581, 1454, 1330, 1283, 1199, 1145, 1115, 1009, 820, 760. HRMS ( $\text{FAB}^+$ ): calcd for  $\text{C}_{10}\text{H}_{11}\text{O}_5$  ( $[\text{M}+\text{H}]^+$ ) 211.0601; found. 211.0603.

**Dimethyl 1-oxo-2,4-diphenyl-1,2-dihydronaphthalene-2,3-dicarboxylate (3j):** Pale yellow crystal; mp 199.8–200.2 °C.  $^1\text{H}$  NMR (400 MHz,  $\text{CDCl}_3$ ):  $\delta$  3.36 (s, 3H), 3.79 (s, 3H), 6.93 (dd,  $J = 0.8, 7.6$  Hz, 1H), 7.27-7.35 (m, 4H), 7.38 (dt,  $J = 2.0, 8.0$  Hz, 1H),

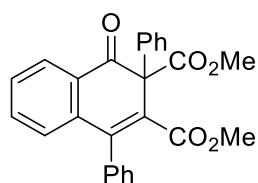

7.42-7.53 (m, 5H), 7.67 (dd,  $J = 2.0, 7.2$  Hz, 2H), 7.92 (dd,  $J = 1.2, 7.6$  Hz, 1H).  $^{13}\text{C}$  NMR (100 MHz,  $\text{CDCl}_3$ ):  $\delta$  51.8, 53.1, 68.0, 127.7, 128.2 (two peaks overlapped), 128.39, 128.40, 128.7, 128.92, 128.93, 129.0, 130.1, 130.5, 134.0, 134.4, 137.5, 137.6, 144.2, 167.0, 169.5, 194.0. IR (KBr /  $\text{cm}^{-1}$ ): 2954, 1763, 1703, 1686, 1439, 1271, 1225, 1140, 719. HRMS (FAB $^+$ ): calcd for  $\text{C}_{26}\text{H}_{20}\text{O}_5$  ( $[\text{M}]^+$ ) 412.1311; found. 412.1315.

**4. Regioselective Benzannulative  $\pi$ -Extension of PAHs.** A flame-dried test tube was charged with NBS (106.7 mg, 0.60 mmol),  $\text{AuCl}_3$  (1.5 mg, 5.0  $\mu\text{mol}$ ),  $\text{ClCH}_2\text{CH}_2\text{Cl}$  (1.0 mL), and aromatic compounds (benzene, naphthalene, and phenanthrene, 0.50 mmol), and the resulting mixture was stirred at 80  $^\circ\text{C}$  for 24 h. The solvent was removed under reduced pressure, and the residue was subjected to flash column chromatography on silica gel with hexane / EtOAc as the eluent to afford the corresponding aryl bromides. Because the above procedure was not applicable to bromination of pyrene and chrysene (complex mixture was obtained), 1-bromopyrene and 6,12-dibromochrysene were synthesized by the treatment of pyrene and chrysene with bromine in  $\text{CHCl}_3$  at 80  $^\circ\text{C}$  for 24 h.

To a stirred solution of  $\text{NaNH}_2$  (17.6 mg, 0.45 mmol) and  $t\text{BuOK}$  (1.7 mg, 15  $\mu\text{mol}$  (30  $\mu\text{mol}$  for the synthesis of **4b**)) in THF (1.0 mL) was added aryl bromides (0.30 mmol) and furan (306.3 mg, 4.5 mmol (9.0 mmol for the synthesis of **4b**)), and the resulting mixture was stirred at 50  $^\circ\text{C}$  for 15 h. The reaction mixture was diluted with  $\text{Et}_2\text{O}$  (5 mL), and passed through short silica gel pad. The filtrate was washed with brine, and extracted with  $\text{Et}_2\text{O}$  for three times. The combined organic layer was dried over  $\text{MgSO}_4$ , filtered, and the solvent was removed under reduced pressure. The residue was treated with  $\text{Re}_2\text{O}_7$  (1.8 mg, 3.75  $\mu\text{mol}$ ),  $\text{P}(\text{OPh})_3$  (111.7 mg, 0.36 mmol), and toluene (0.90 mL), and the resulting mixture was stirred at 80  $^\circ\text{C}$  for 18 h. The solvent was removed under the reduced pressure, and the residue was subjected to flash column chromatography on silica gel with hexane as

the eluent to afford the corresponding aromatic compounds **4**.

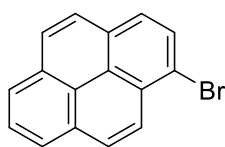

**1-Bromopyrene:** Colorless solid;  $^1\text{H}$  NMR (400 MHz,  $\text{CDCl}_3$ ):  $\delta$  7.89 (d,  $J = 8.4$  Hz, 1H), 7.90 (d,  $J = 8.4$  Hz, 1H), 7.97 (d,  $J = 7.6$  Hz, 1H), 7.99 (d,  $J = 9.2$  Hz, 1H), 8.06 (d,  $J = 9.2$  Hz, 1H), 8.12-8.18 (m, 3H), 8.34 (d,  $J = 9.2$  Hz, 1H).  $^{13}\text{C}$  NMR (100 MHz,  $\text{CDCl}_3$ ):  $\delta$  119.7, 123.8, 125.3, 125.4, 125.5, 125.6, 125.7, 126.3, 126.9, 127.5, 128.7, 129.4, 129.8, 130.4, 130.7, 130.9. The analytical data match those reported in the literature (R. S. Kathayat, N. S. Finney, *J. Am. Chem. Soc.* 2013, **135**, 12612; W. Wu, X. Wu, J. Zhao, M. Wu, *J. Mater. Chem. C.* 2015, **3**, 2291).

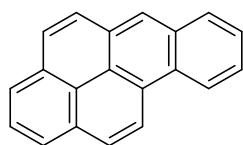

**Benzo[a]pyrene (4a):** A pale yellow solid;  $^1\text{H}$  NMR (400 MHz,  $\text{CDCl}_3$ ):  $\delta$  7.78 (dt,  $J = 1.2, 7.2$  Hz, 1H), 7.82 (dt,  $J = 1.2, 7.2$  Hz, 1H), 7.90 (d,  $J = 8.8$  Hz, 1H), 7.97 (d,  $J = 9.2$  Hz, 1H), 7.98 (d,  $J = 7.6$  Hz, 1H), 8.08 (d,  $J = 7.6$  Hz, 1H), 8.22 (d,  $J = 7.6$  Hz, 1H), 8.27 (d,  $J = 6.4$  Hz, 1H), 8.29 (d,  $J = 9.2$  Hz, 1H), 8.47 (s, 1H), 9.00 (d,  $J = 7.2$  Hz, 1H), 9.01 (d,  $J = 7.2$  Hz, 1H).  $^{13}\text{C}$  NMR (100 MHz,  $\text{CDCl}_3$ ):  $\delta$  122.1, 122.9, 123.7, 124.7, 124.8, 125.3, 125.5, 125.9, 126.0, 126.1, 127.3, 127.4, 127.7, 128.0, 128.1, 128.8, 129.8, 131.2, 131.3, 131.5. IR (KBr /  $\text{cm}^{-1}$ ): 3071, 3036, 1616, 1558, 1508, 1474, 1314, 1182, 883, 839, 758, 743, 691. HRMS ( $\text{FAB}^+$ ): calcd for  $\text{C}_{20}\text{H}_{12}$  ( $[\text{M}]^+$ ) 252.0939; found. 252.0944.

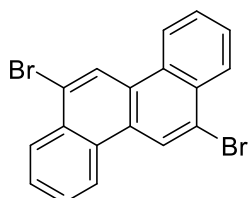

**6,12-Dibromochrysene:** A colorless solid; m.p. 287.9-288.4 °C.  $^1\text{H}$  NMR (400 MHz,  $\text{CDCl}_3$ ):  $\delta$  7.76 (t,  $J = 7.2$  Hz, 2H), 7.79 (t,  $J = 7.2$  Hz, 2H), 8.45 (dd,  $J = 2.4, 7.2$  Hz, 2H), 8.71 (dd,  $J = 2.4, 7.2$  Hz, 2H), 9.01 (s, 2H).  $^1\text{H}$  NMR data match those reported in the literature (Bock, H.; Huet, S.; Dechambenoit, P.; Hillard, E. A.; Durola, F. *Eur. J. Org. Chem.* 2015, 1033).  $^{13}\text{C}$  NMR (100 MHz,  $\text{CDCl}_3$ ):  $\delta$  123.3, 123.4, 125.4, 127.90, 127.94, 128.3, 128.4, 130.7, 131.0. IR

(KBr /  $\text{cm}^{-1}$ ): 3040, 1576, 1508, 1396, 916, 864, 752. HRMS (FAB<sup>+</sup>): calcd for  $\text{C}_{18}\text{H}_{10}\text{Br}_2$  ( $[\text{M}]^+$ ) 383.9149; found. 383.9148.

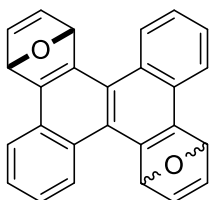

**1,4,9,12-Tetrahydro-1,4:9,12-diepoxydibenzo[g,p]chrysene:** A yellow solid (Obtained as a mixture of two stereoisomers. The ratio was determined to be 60 / 40 by <sup>1</sup>H NMR analysis of the crude product); <sup>1</sup>H NMR for major isomer (400 MHz,  $\text{CDCl}_3$ ):  $\delta$  6.40 (s, 2H), 6.89 (s, 2H), 7.46 (dd,  $J = 1.6, 5.6$  Hz, 2H), 7.61 (dd,  $J = 1.6, 5.6$  Hz, 2H), 7.68-7.71 (m, 4H), 8.02-8.05 (m, 2H), 8.39-8.43 (m, 2H). <sup>1</sup>H NMR for minor isomer (400 MHz,  $\text{CDCl}_3$ ):  $\delta$  6.43 (s, 2H), 7.00 (s, 2H), 7.40 (dd,  $J = 1.6, 5.6$  Hz, 2H), 7.52 (dd,  $J = 1.6, 5.6$  Hz, 2H), 7.68-7.71 (m, 4H), 8.03-8.08 (m, 2H), 8.64-8.67 (m, 2H). <sup>13</sup>C NMR (100 MHz,  $\text{CDCl}_3$ ):  $\delta$  80.9, 81.2, 85.4, 85.9, 122.8, 123.1, 124.0, 124.5, 125.9, 126.0, 126.3 (two peaks overlapped), 126.6, 126.7, 127.3, 128.0, 128.3, 143.7, 144.0, 144.3, 144.4, 146.9, 147.1, 147.2, 147.3. IR (KBr /  $\text{cm}^{-1}$ ): 3003, 1541, 1273, 1038, 889, 841, 768. HRMS (FAB<sup>+</sup>): calcd for  $\text{C}_{26}\text{H}_{16}\text{O}_2$  ( $[\text{M}]^+$ ) 360.1150; found. 360.1158.

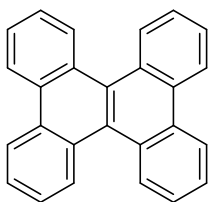

**Dibenzo[g,p]chrysene (4b):** A pale yellow solid; <sup>1</sup>H NMR (400 MHz,  $\text{CDCl}_3$ ):  $\delta$  7.64 (t,  $J = 8.0$  Hz, 4H), 7.69 (t,  $J = 8.0$  Hz, 4H), 8.68-8.73 (m, 8H). <sup>13</sup>C NMR (100 MHz,  $\text{CDCl}_3$ ):  $\delta$  123.6, 126.6 (two peaks overlapped), 128.9, 129.2, 130.9, 131.6. The analytical data match those reported in the literature (Y. Kurata, S. Otsuka, N. Fukui, K. Nogi, H. Yorimitsu, A. Osuka, *Org. Lett.* 2017, **19**, 1274).

**1,4-Dimethylphenanthrene (4c):** Colorless crystal; <sup>1</sup>H NMR (400 MHz,  $\text{CDCl}_3$ ):  $\delta$  2.76 (s, 3 H), 3.14 (s, 3 H), 7.34 (d,  $J = 7.2$  Hz, 1H), 7.38 (d,  $J = 7.2$  Hz, 1H), 7.58-7.64 (m, 2H), 7.78 (d,  $J = 9.2$  Hz, 1H), 7.93 (d,  $J = 7.6$  Hz, 1H), 7.98 (d,  $J = 9.2$  Hz, 1H), 8.91 (d,  $J = 9.2$

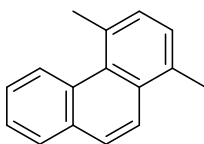

Hz, 1H).  $^{13}\text{C}$  NMR (100 MHz,  $\text{CDCl}_3$ ):  $\delta$  20.3, 27.4, 123.5, 125.3, 125.7, 126.8, 127.3, 127.7, 128.5, 130.3, 130.7, 131.9, 132.2, 132.8, 133.1, 133.3. The analytical data match those reported in the literature (S.

Nandi, K. Panda, J. R. Suresh, H. Ilaa, H. Junjappa, *Tetrahedron* 2004, **60**, 3663).

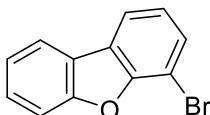

**4-Bromodibenzo[*b,d*]furan:** This compound was synthesized according to the reported procedure,<sup>12</sup> and obtained as a mixture of 12% of dibenzofuran after the purification by column chromatography on silica

gel with hexane as the eluent. The analytically pure sample was obtained by further purification with GPC. A colorless crystal;  $^1\text{H}$  NMR (400 MHz,  $\text{CDCl}_3$ ):  $\delta$  7.24 (t,  $J = 7.6$  Hz, 1H), 7.38 (dt,  $J = 0.8, 7.6$  Hz, 1H), 7.50 (dt,  $J = 1.6, 7.6$  Hz, 1H), 7.62 (d,  $J = 1.6, 7.6$  Hz, 1H), 7.66 (d,  $J = 7.6$  Hz, 1H), 7.90 (dd,  $J = 0.8, 7.6$  Hz, 1H), 7.94 (dd,  $J = 0.8, 7.6$  Hz, 1H).  $^{13}\text{C}$  NMR (100 MHz,  $\text{CDCl}_3$ ):  $\delta$  104.5, 112.1, 119.6, 121.0, 123.3, 123.9, 124.2, 125.7, 127.8, 130.0, 153.3, 156.0. The analytical data match those reported in the literature.<sup>12</sup>

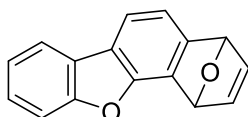

**Benzo[*b*]naphtho[2,1-*d*]furan:** Colorless solid;  $^1\text{H}$  NMR (400 MHz,  $\text{CDCl}_3$ ):  $\delta$  5.89 (s, 1H), 6.24 (s, 1H), 7.14-7.15 (m, 2H), 7.31 (d,  $J = 7.6$  Hz, 1H), 7.32 (t,  $J = 7.6$  Hz, 1H), 7.44 (t,  $J = 7.6$  Hz, 1H), 7.54 (d,  $J = 7.6$  Hz, 1H), 7.59 (d,  $J = 7.6$  Hz, 1H), 7.90 (d,  $J = 7.6$  Hz, 1H).  $^{13}\text{C}$  NMR (100 MHz,  $\text{CDCl}_3$ ):  $\delta$  80.1, 82.9, 111.5, 115.4, 117.3, 120.7, 122.8, 123.5, 124.2, 127.3, 131.1, 142.7, 143.9, 149.0, 150.0, 156.6. HRMS (FAB<sup>+</sup>): calcd for  $\text{C}_{16}\text{H}_{10}\text{O}_2$  ( $[\text{M}]^+$ ) 234.0681; found. 234.0671.

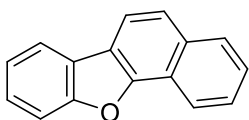

**Benzo[*b*]naphtho[2,1-*d*]furan (4d):** Pale yellow solid;  $^1\text{H}$  NMR (400 MHz,  $\text{CDCl}_3$ ):  $\delta$  7.41 (dt,  $J = 1.2, 7.6$  Hz, 1H), 7.49 (dt,  $J = 1.2, 7.6$  Hz, 1H), 7.58 (dt,  $J = 1.2, 7.2$  Hz, 1H), 7.66 (dt,  $J = 1.2, 7.2$  Hz, 1H), 7.73 (d,  $J = 8.4$

Hz, 1H), 7.79 (d,  $J = 8.4$  Hz, 1H), 7.99-8.03 (m, 3H), 8.47 (d,  $J = 8.4$  Hz, 1H).  $^{13}\text{C}$  NMR (100 MHz,  $\text{CDCl}_3$ ):  $\delta$  111.8, 118.5, 119.2, 120.3, 120.9, 121.4, 122.9, 123.3, 125.1, 126.1, 126.2, 126.5, 128.4, 133.1, 152.0, 156.0. The analytical data match those reported in the literature (S. Maetani, T. Fukuyama, I. Ryu, *Org. Lett.* 2013, **15**, 2754; T. Okazaki, M. Nakagawa, T. Kitagawa, K. K. Laali, *Bull. Chem. Soc. Jpn.* 2014, **87**, 1235).

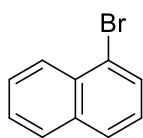

**1-Bromonaphthalene [CAS 90-11-9]:** Colorless oil;  $^1\text{H}$  NMR (400 MHz,  $\text{CDCl}_3$ ):  $\delta$  7.33 (t,  $J = 7.2$  Hz, 1H), 7.54 (t,  $J = 7.2$  Hz, 1H), 7.61 (t,  $J = 7.2$  Hz, 1H), 7.85 (d,  $J = 7.6$  Hz, 1H), 7.82 (d,  $J = 8.8$  Hz, 1H), 7.85 (d,  $J = 8.8$  Hz,

1H), 8.26 (d,  $J = 8.8$  Hz, 1H).  $^{13}\text{C}$  NMR (100 MHz,  $\text{CDCl}_3$ ):  $\delta$  122.8, 126.2, 126.7, 127.1, 127.3, 127.9, 128.3, 129.9, 132.0, 134.6. The analytical data match those measured for commercial sample.

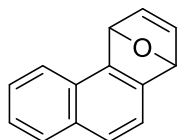

**1,4-Dihydro-1,4-epoxyphenanthrene:** Pale yellow solid;  $^1\text{H}$  NMR (400 MHz,  $\text{CDCl}_3$ ):  $\delta$  5.93 (s, 1H), 6.27 (s, 1H), 7.21 (s, 2H), 7.38 (dt,  $J = 0.8$ , 7.2 Hz, 1H), 7.46 (dt,  $J = 0.8$ , 7.2 Hz, 1H), 7.54 (d,  $J = 8.0$  Hz, 1H), 7.58 (d,

$J = 8.0$  Hz, 1H), 7.82 (t,  $J = 9.2$  Hz, 1H), 7.83 (t,  $J = 9.2$  Hz, 1H).  $^{13}\text{C}$  NMR (100 MHz,  $\text{CDCl}_3$ ):  $\delta$  81.2, 83.4, 119.3, 122.6, 125.1, 125.4, 126.2, 127.6, 128.7, 131.7, 143.4, 144.9, 147.8, 148.3. HRMS (FAB $^+$ ): calcd for  $\text{C}_{14}\text{H}_{11}\text{O}$  ( $[\text{M}+\text{H}]^+$ ) 195.0809; found. 195.0801. The analytical data match those reported in the literature (S. K. Sundalam, A. Nilova, T. L. Seidl, D. R. Stuart, *Angew. Chem. Int. Ed.* 2016, **55**, 8431).

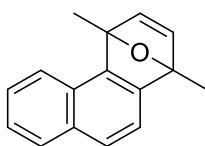

**1,4-Dimethyl-1,4-dihydro-1,4-epoxyphenanthrene:** Colorless oil;  $^1\text{H}$  NMR (400 MHz,  $\text{CDCl}_3$ ):  $\delta$  2.02 (s, 3H), 2.31 (s, 3H), 6.92 (d,  $J = 5.6$  Hz, 1H), 7.02 (d,  $J = 5.6$  Hz, 1H), 7.35 (t,  $J = 7.6$  Hz, 1H), 7.42 (d,  $J =$

8.4 Hz, 1H), 7.45 (t,  $J = 8.0$  Hz, 1H), 7.60 (d,  $J = 8.0$  Hz, 1H), 7.85 (d,  $J = 8.4$  Hz, 1H),

8.04 (d,  $J = 8.4$  Hz, 1H).  $^{13}\text{C}$  NMR (100 MHz,  $\text{CDCl}_3$ ):  $\delta$ 15.4, 18.8, 88.9, 90.7, 117.5, 122.4, 124.5, 125.9, 126.1, 127.8, 129.2, 132.1, 148.2, 148.3, 149.4, 152.4. The analytical data match those reported in the literature (K.-y. Jung, M. Koreeda, *J. Org. Chem.* 1998, **54**, 5667).

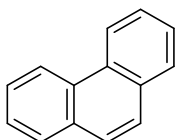

**Phenanthrene (4e)** [CAS 85-01-8]: Colorless crystal;  $^1\text{H}$  NMR (400 MHz,  $\text{CDCl}_3$ ):  $\delta$ 7.61 (t, 7.6 Hz, 2H), 7.67 (dt,  $J = 2.0, 6.8$  Hz, 2H), 7.76 (s, 2H), 7.90 (dt,  $J = 2.0, 7.6$  Hz, 2H), 8.71 (d,  $J = 8.4$  Hz, 2H).  $^{13}\text{C}$  NMR (100 MHz,  $\text{CDCl}_3$ ):  $\delta$ 122.6, 126.5 (overlapped), 126.9, 128.6, 130.3, 132.0. The analytical data match those reported in the literature (R. Wakabayashi, T. Kurahashi, S. Matsubara, *Synlett* 2013, **24**, 2297).

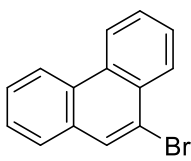

**9-Bromophenanthrene** [CAS 573-17-1]: Colorless solid;  $^1\text{H}$  NMR (400 MHz,  $\text{CDCl}_3$ ):  $\delta$ 7.61 (dt,  $J = 1.2, 6.8$  Hz, 1H), 7.65-7.73 (m, 3H), 7.81 (dd,  $J = 0.8, 7.6$  Hz, 1H), 8.12 (s, 1H), 8.36-8.39 (m, 1H), 8.66 (d,  $J = 8.0$  Hz, 1H), 8.68-8.71 (m, 1H).  $^{13}\text{C}$  NMR (100 MHz,  $\text{CDCl}_3$ ):  $\delta$ 121.7, 122.7, 122.8, 127.1, 127.2, 127.4, 127.5, 127.8, 128.1, 129.8, 130.4, 130.5, 131.3, 132.2. The analytical data match those measured for commercial sample.

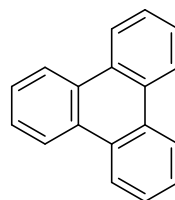

**Triphenylene (4f)** [CAS 217-59-4]: Pale yellow solid;  $^1\text{H}$  NMR (400 MHz,  $\text{CDCl}_3$ ):  $\delta$ 7.67 (dd,  $J = 3.2, 6.4$  Hz, 6H), 8.65 (dd,  $J = 3.2, 6.4$  Hz, 6H).  $^{13}\text{C}$  NMR (100 MHz,  $\text{CDCl}_3$ ):  $\delta$ 123.3, 127.2, 129.8. The analytical data match those reported in the literature (J.-C. Hsieh, C.-H. Cheng, *Chem. Commun.* 2008, 2992).

## 5. Optimization of Reaction Conditions

**Table S1.** Optimization of Reaction Conditions

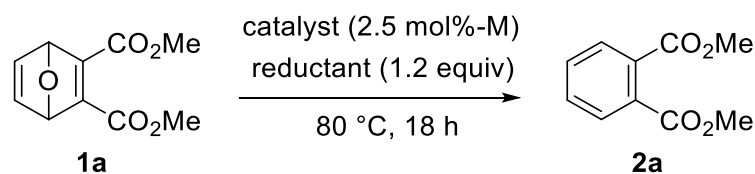

| Entry           | catalyst                                             | solvent                              | reductant                             | Yield of <b>2a</b> <sup>a</sup> / % | Recov. of <b>1a</b> <sup>a</sup> / % |
|-----------------|------------------------------------------------------|--------------------------------------|---------------------------------------|-------------------------------------|--------------------------------------|
| 1               | MeReO <sub>3</sub>                                   | toluene                              | P(OPh) <sub>3</sub>                   | 84                                  | 0                                    |
| 2               | ReOCl <sub>3</sub> (PPh <sub>3</sub> ) <sub>2</sub>  | toluene                              | P(OPh) <sub>3</sub>                   | 88                                  | 0                                    |
| 3               | ReIO <sub>2</sub> (PPh <sub>3</sub> ) <sub>2</sub>   | toluene                              | P(OPh) <sub>3</sub>                   | 82                                  | 0                                    |
| 4               | Re <sub>2</sub> O <sub>7</sub>                       | toluene                              | P(OPh) <sub>3</sub>                   | 94 (93)                             | 0                                    |
| 5               | ReCl <sub>5</sub>                                    | toluene                              | P(OPh) <sub>3</sub>                   | 89                                  | 0                                    |
| 6               | NH <sub>4</sub> ReO <sub>4</sub>                     | toluene                              | P(OPh) <sub>3</sub>                   | 92 (90)                             | 0                                    |
| 7 <sup>b</sup>  | NH <sub>4</sub> ReO <sub>4</sub>                     | toluene                              | P(OPh) <sub>3</sub>                   | 85                                  | 0                                    |
| 8               | ReCl <sub>3</sub> (PPhMe <sub>2</sub> ) <sub>3</sub> | toluene                              | P(OPh) <sub>3</sub>                   | 67                                  | 0                                    |
| 9               | MoO <sub>2</sub> Cl <sub>2</sub>                     | toluene                              | P(OPh) <sub>3</sub>                   | 54                                  | 0                                    |
| 10              | NH <sub>4</sub> ReO <sub>4</sub>                     | toluene                              | P(OEt) <sub>3</sub>                   | 0                                   | 0                                    |
| 11              | NH <sub>4</sub> ReO <sub>4</sub>                     | toluene                              | PPh <sub>3</sub>                      | 0                                   | 38                                   |
| 12              | NH <sub>4</sub> ReO <sub>4</sub>                     | toluene                              | P( <i>o</i> -tol) <sub>3</sub>        | 10                                  | 72                                   |
| 13              | NH <sub>4</sub> ReO <sub>4</sub>                     | toluene                              | P(2-furyl) <sub>3</sub>               | 62                                  | 62                                   |
| 14              | NH <sub>4</sub> ReO <sub>4</sub>                     | toluene                              | P <sup><i>n</i></sup> Bu <sub>3</sub> | 0                                   | 19                                   |
| 15              | NH <sub>4</sub> ReO <sub>4</sub>                     | toluene                              | dppe                                  | 37                                  | 0                                    |
| 16 <sup>c</sup> | NH <sub>4</sub> ReO <sub>4</sub>                     | toluene                              | 3-pentanol                            | 74                                  | 0                                    |
| 17              | NH <sub>4</sub> ReO <sub>4</sub>                     | toluene                              | <i>i</i> PrOH                         | 54                                  | 0                                    |
| 18 <sup>c</sup> | NH <sub>4</sub> ReO <sub>4</sub>                     | toluene                              | Zn                                    | 23                                  | 21                                   |
| 19 <sup>c</sup> | NH <sub>4</sub> ReO <sub>4</sub>                     | toluene                              | Na <sub>2</sub> SO <sub>3</sub>       | 2                                   | 32                                   |
| 20 <sup>c</sup> | NH <sub>4</sub> ReO <sub>4</sub>                     | toluene                              | —                                     | 0                                   | 80                                   |
| 21              | NH <sub>4</sub> ReO <sub>4</sub>                     | C <sub>6</sub> H <sub>5</sub> Cl     | P(OPh) <sub>3</sub>                   | 41                                  | 26                                   |
| 22              | NH <sub>4</sub> ReO <sub>4</sub>                     | <sup><i>n</i></sup> decane           | P(OPh) <sub>3</sub>                   | 48                                  | 42                                   |
| 23              | NH <sub>4</sub> ReO <sub>4</sub>                     | cyclohexane                          | P(OPh) <sub>3</sub>                   | 50                                  | 10                                   |
| 24              | NH <sub>4</sub> ReO <sub>4</sub>                     | ClCH <sub>2</sub> CH <sub>2</sub> Cl | P(OPh) <sub>3</sub>                   | 28                                  | 18                                   |
| 25              | NH <sub>4</sub> ReO <sub>4</sub>                     | 1,4-dioxane                          | P(OPh) <sub>3</sub>                   | 31                                  | 40                                   |
| 26              | NH <sub>4</sub> ReO <sub>4</sub>                     | MeCN                                 | P(OPh) <sub>3</sub>                   | 0                                   | 81                                   |

<sup>a</sup>Determined by <sup>1</sup>H NMR. Values in parentheses are the isolated yields. <sup>b</sup>NH<sub>4</sub>ReO<sub>4</sub> (1 mol%) for 36 h. <sup>c</sup>At 120 °C.

**2a** was not obtained with the following catalysts: TiCl<sub>4</sub>, Cr<sub>2</sub>O<sub>7</sub>, WCl<sub>6</sub>, MnO<sub>2</sub>, MnBr<sub>2</sub>, Mn(acac)<sub>2</sub>, Re<sub>2</sub>(CO)<sub>10</sub>, [ReBr(CO)<sub>3</sub>(thf)]<sub>2</sub>, RuCl<sub>3</sub>, Rh<sub>2</sub>(OAc)<sub>4</sub>, NiCl<sub>2</sub>, Cu<sub>2</sub>O.



## 6. Tolerance of Functional Groups in Deoxygenative Aromatization of 1a

**Table S2.** Study of the Functional Group Tolerance

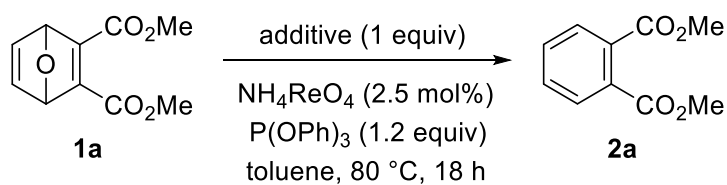

| Entry | additive                                                           | Recov. of additive <sup>a</sup> / % | Yield <sup>a</sup> / % |
|-------|--------------------------------------------------------------------|-------------------------------------|------------------------|
| 1     | $\text{Ph}(\text{CH}_2)_2\text{COMe}$                              | 94                                  | 86                     |
| 2     | $\text{Ph}(\text{CH}_2)_2\text{CO}_2\text{Et}$                     | >95                                 | 84                     |
| 3     | 1,3-(MeO) <sub>2</sub> C <sub>6</sub> H <sub>4</sub>               | >95                                 | 86                     |
| 4     | 4- <sup>n</sup> BuC <sub>6</sub> H <sub>4</sub> Br                 | >95                                 | 81                     |
| 5     | $\text{Ph}(\text{CH}_2)_2\text{Br}$                                | 86                                  | 86                     |
| 6     | $\text{Ph}(\text{CH}_2)_2\text{CN}$                                | 84                                  | 87                     |
| 7     | $\text{Ph}(\text{CH}_2)_2\text{CHO}$                               | 62                                  | 87                     |
| 8     | $\text{MeO}_2\text{C}-\text{C}\equiv\text{C}-\text{CO}_2\text{Me}$ | 91                                  | 88                     |

<sup>a</sup>Determined by <sup>1</sup>H NMR.

## 7. Plausible Reaction Mechanism

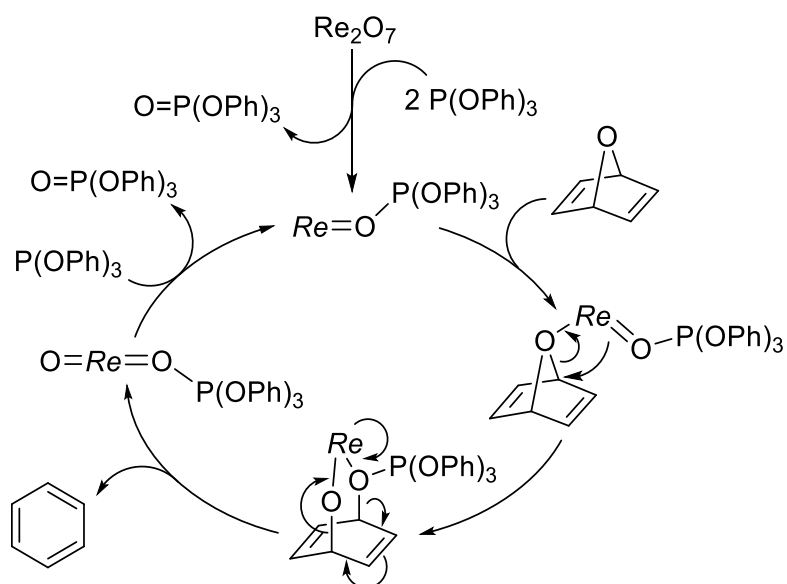

**Figure S1.** Plausible Reaction Mechanism

## 8. Comparison with the Reported Deoxygenation Protocols

**Table S3.** Deoxygenation of **1a** by Various Methods

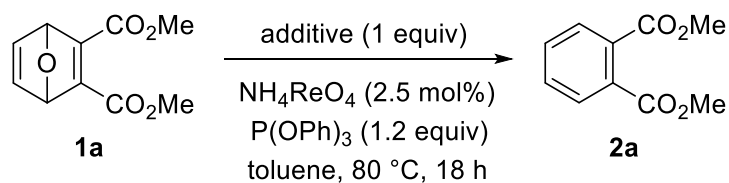

| Entry | conditions                                                                                                            | Yield <sup>a</sup> | reference                                        |
|-------|-----------------------------------------------------------------------------------------------------------------------|--------------------|--------------------------------------------------|
| 1     | TiCl <sub>4</sub> (6.8 equiv), LiAlH <sub>4</sub> (2.7 equiv)<br>Et <sub>3</sub> N (1.1 equiv), THF, 0 to 65 °C, 24 h | 45% (lit. 64%)     | <i>J. Org. Chem.</i> 1982, <b>47</b> , 140.      |
| 2     | Mo(CO) <sub>6</sub> (1.1 equiv)<br>cyclohexane, reflux, 48 h                                                          | 21% (lit. 46%)     | <i>Heterocycles</i> 1998, <b>27</b> , 217.       |
| 3     | PhMgBr (10 equiv)<br>THF, reflux, 2 h                                                                                 | 0%                 | <i>Tetrahedron Lett.</i> 1997, <b>38</b> , 4761. |
| 4     | Me <sub>3</sub> SiCl (3 equiv), NaI (3 equiv)<br>CH <sub>3</sub> CN, rt, 1 h                                          | 0%                 | <i>J. Org. Chem.</i> 1989, <b>54</b> , 5667.     |
| 5     | Zn (15 equiv), CH <sub>3</sub> CO <sub>2</sub> H<br>toluene, 100 °C, 18 h, 8 h                                        | 16%                | <i>Tetrahedron Lett.</i> 1980, <b>21</b> , 3627. |
| 6     | NH <sub>4</sub> ReO <sub>4</sub> (2.5 mol%)<br>P(OPh) <sub>3</sub> (1.2 equiv), toluene, 80 °C, 18 h                  | 92% (90%)          | <b>This work</b>                                 |

Determined by <sup>1</sup>H NMR. Value in parentheses is the isolated yield. "lit." means yields reported in the reference.

## 9. References

1. N. Sultan, R. Guillot, L. Blanco, S. Deloisy, *Synthesis* 2013, **45**, 2018.
2. (a) R. R. Burton, W. Tam, *Tetrahedron Lett.* 2006, **47**, 7185; (b) M. G. Constantino, V. Aragão, G. V. J. da Silva, *Tetrahedron Lett.* 2008, **49**, 1393.
3. (a) Y. D. Xing, N. Z. Huang, *J. Org. Chem.* 1982, **47**, 140; (b) D. P. O'Malley, K. Li, M. Maue, A. L. Zografos, P. S. Baran, *J. Am. Chem. Soc.* 2007, **129**, 4762.
4. (a) T. Nishimura, T. Kawamoto, K. Sasaki, E. Tsurumaki, T. Hayahsi, *J. Am. Chem. Soc.* 2007, **129**, 1492; (b) I. Rose, M. Carta, R. Malpass-Evans, M.-C. Ferrari, P. Bernardo, G. Clarizia, J. C. Jansen, N. B. McKeown, *ACS Macro Lett.* 2015, **4**, 912.
5. (a) K. Villeneuve, W. Tam, *Eur. J. Org. Chem.* 2006, 5449; (b) R. R. Burton, W. Tam, *J. Org. Chem.* 2007, **72**, 7333.
6. (a) R. Webster, C. Böing, M. Lautens, *J. Am. Chem. Soc.* 2009, **131**, 444; (b) Y. Sawama, T. Kawajiri, S. Asai, N. Yasukawa, Y. Shishido, Y. Monguchi, H. Sajiki, *J. Org. Chem.* 2015, **80**, 5556.
7. (a) R. Luo, J. Liao, L. Xie, W. Tang, A. S. C. Chan, *Chem. Commun.* 2013, **49**, 9959; (b) H. Haneda, S. Eda, M. Aratani, T. Hamura, *Org. Lett.* 2014, **16**, 286.
8. F. Bailly, F. Cottet, M. Schlosser, *Synthesis* 2005, 791.
9. (a) M. Lautens, G. A. Schmid, A. Chau, *J. Org. Chem.* 2002, **67**, 8043; (b) I. Sapountzis, W. Lin, M. Fischer, P. Knochel, *Angew. Chem. Int. Ed.* 2004, **43**, 4364.
10. (a) C. S. LeHoullier, G. W. Gribble, *J. Org. Chem.* 1983, **48**, 2364; (b) Y.-L. Chen, J.-Q. Sun, X. Wei, W.-Y. Wong, A. W. M. Lee, *J. Org. Chem.* 2004, **69**, 7190.
11. (a) Y. Kuninobu, Y. Nishina, C. Nakagawa, K. Takai, *J. Am. Chem. Soc.* 2006, **128**, 12376; (b) Y. Kuninobu, Y. Nishina, K. Takai, *Tetrahedron* 2007, **63**, 8463.
12. (a) Y. Unger, D. Meyer, O. Molt, C. Schildknecht, I. Münster, G. Wagenblast, T. Strassner, *Angew. Chem. Int. Ed.* 2010, **49**, 10214; (b) T. Okazaki, M. Nakagawa, T. Kitagawa, K. K. Laali, *Bull. Chem. Soc. Jpn.* 2014, **87**, 1235.

**10. X-ray Crystallographic Studies of Isomerized Product 3j (CCDC 1873272):** Pale yellow crystal of **3j** suitable for X-ray analysis was obtained by recrystallization from CH<sub>2</sub>Cl<sub>2</sub> at 25 °C. All measurements were made on a Rigaku R-Axis imaging plate area detector with multi-layer monochromated Mo-K $\alpha$  radiation. Details of crystal and data collection parameters are summarized in Table S4. The positions of non-hydrogen atoms were determined by direct methods (SHELXS97) and subsequent Fourier syntheses. An ORTEP drawing is shown in Figure S2.

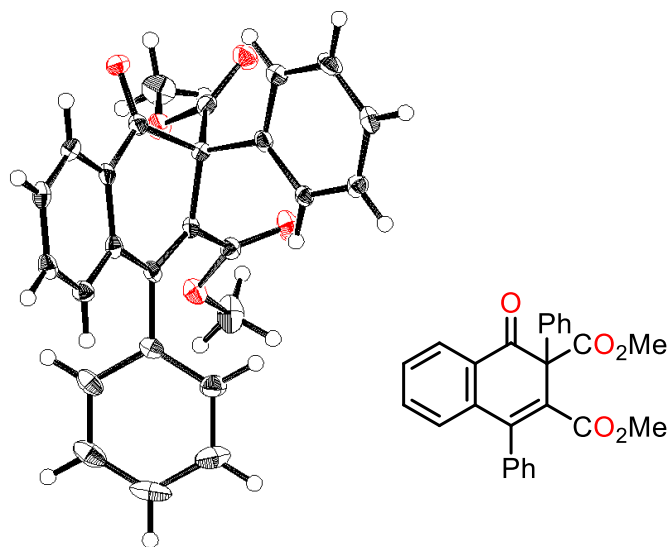

**Figure S2.** ORTEP drawing of borylcyclopropane **3j**. Thermal ellipsoids are drawn at the 50% probability level.

**Table S4.** Summary of Crystallographic Data of Borylcyclopropane **3j**

---

Empirical formula: C<sub>26</sub>H<sub>20</sub>O<sub>5</sub>  
Formula weight: 412.44  
Crystal system: monoclinic  
Space group: P2<sub>1</sub>/c (#14)  
Crystal color: yellow  
Lattice parameters:  
 $a$  (Å) = 15.7487(10),  $b$  (Å) = 7.427(5),  $c$  (Å) = 17.812(11)  
 $\beta$  (°) = 96.731(8),  $V$  (Å<sup>3</sup>) = 2069.0(19),  $Z$  = 4  
 $D_{\text{calc}}$  (g cm<sup>-3</sup>): 1.324  
 $\mu$  (Mo K  $\alpha$ ) (cm<sup>-1</sup>): 0.915  
Goodness of fit (GOF) = 1.242  
 $F(000)$ : 864.00  
Diffractometer: Saturn724  
Radiation: MoK  $\alpha$  ( $\lambda$  = 0.71075 Å), Multi-layer Mirror Monochromated  
Temp (°C): -163.0  
Scan type:  $\omega - 2\theta$   
Max.  $2\theta$  (°): 55.0  
No. of reflections measured total: 32142  
No. of observns ( $I > 3.00 \sigma(I)$ ): 4746  
Structure solution: Direct Methods (SHELXS97)  
Refinement: Full-Matrix Least-Squares on  $F^2$   
No. of variables: 280  
Reflection/parameter ratio: 16.95  
Residuals:  $R$  = 0.1148,  $wR2$  = 0.2221  
Max Shift/Error in Final Cycle: 0.000  
Maximum peak in Final Diff Map (e (Å<sup>-3</sup>)): 0.26  
Minimum peak in Final Diff Map (e (Å<sup>-3</sup>)): -0.27

---

# 11. <sup>1</sup>H NMR and <sup>13</sup>C NMR Spectra of Products

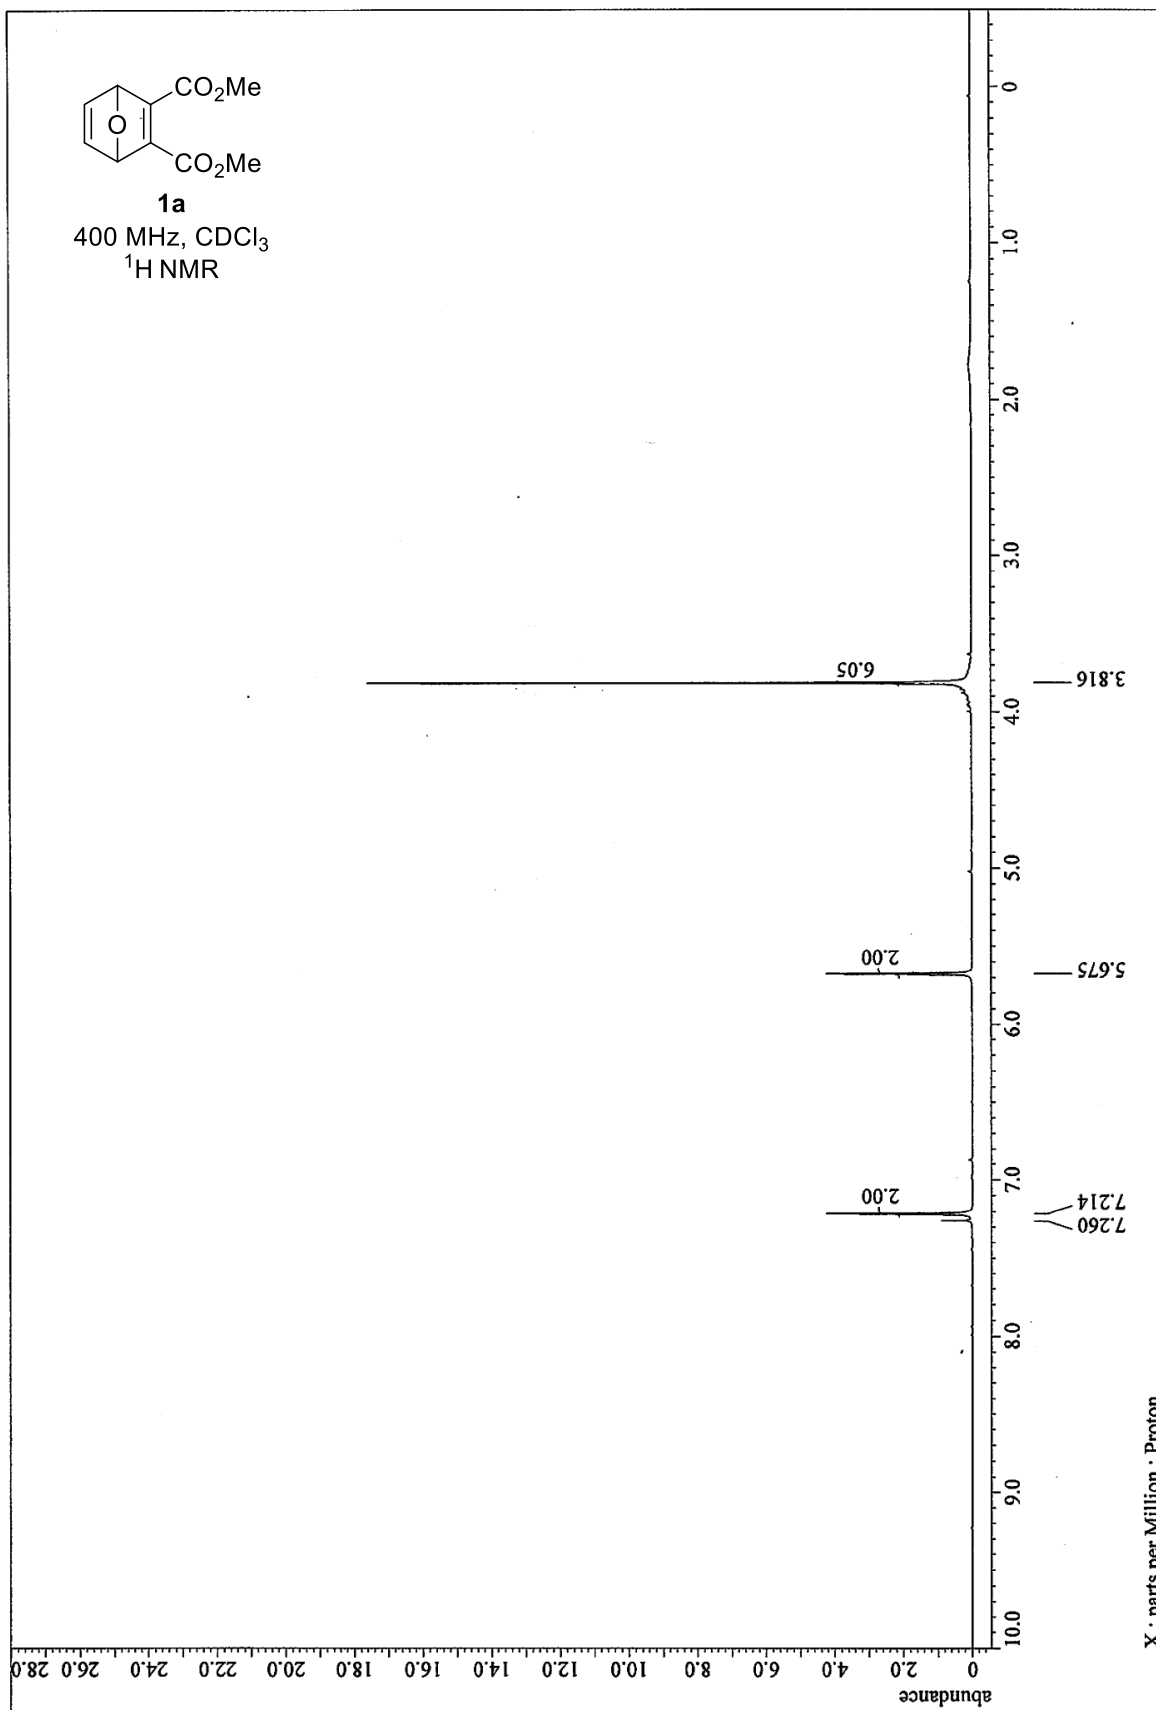

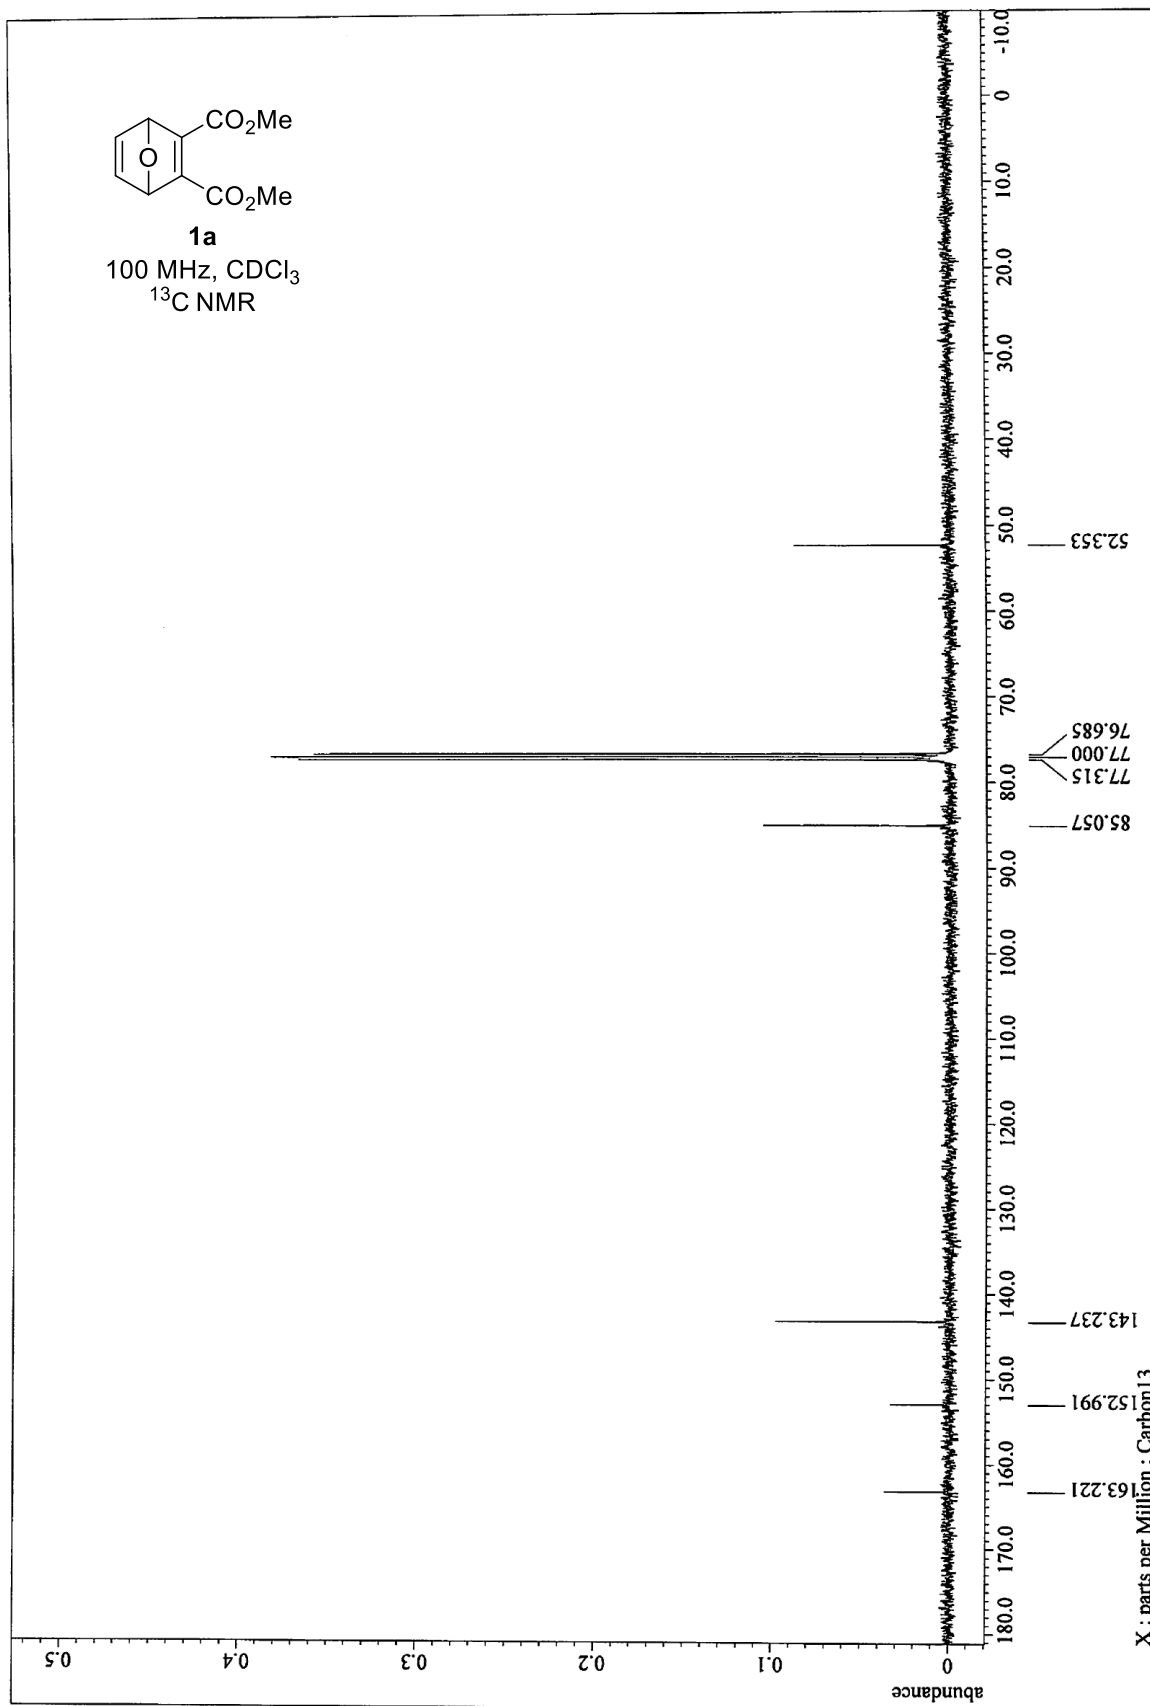

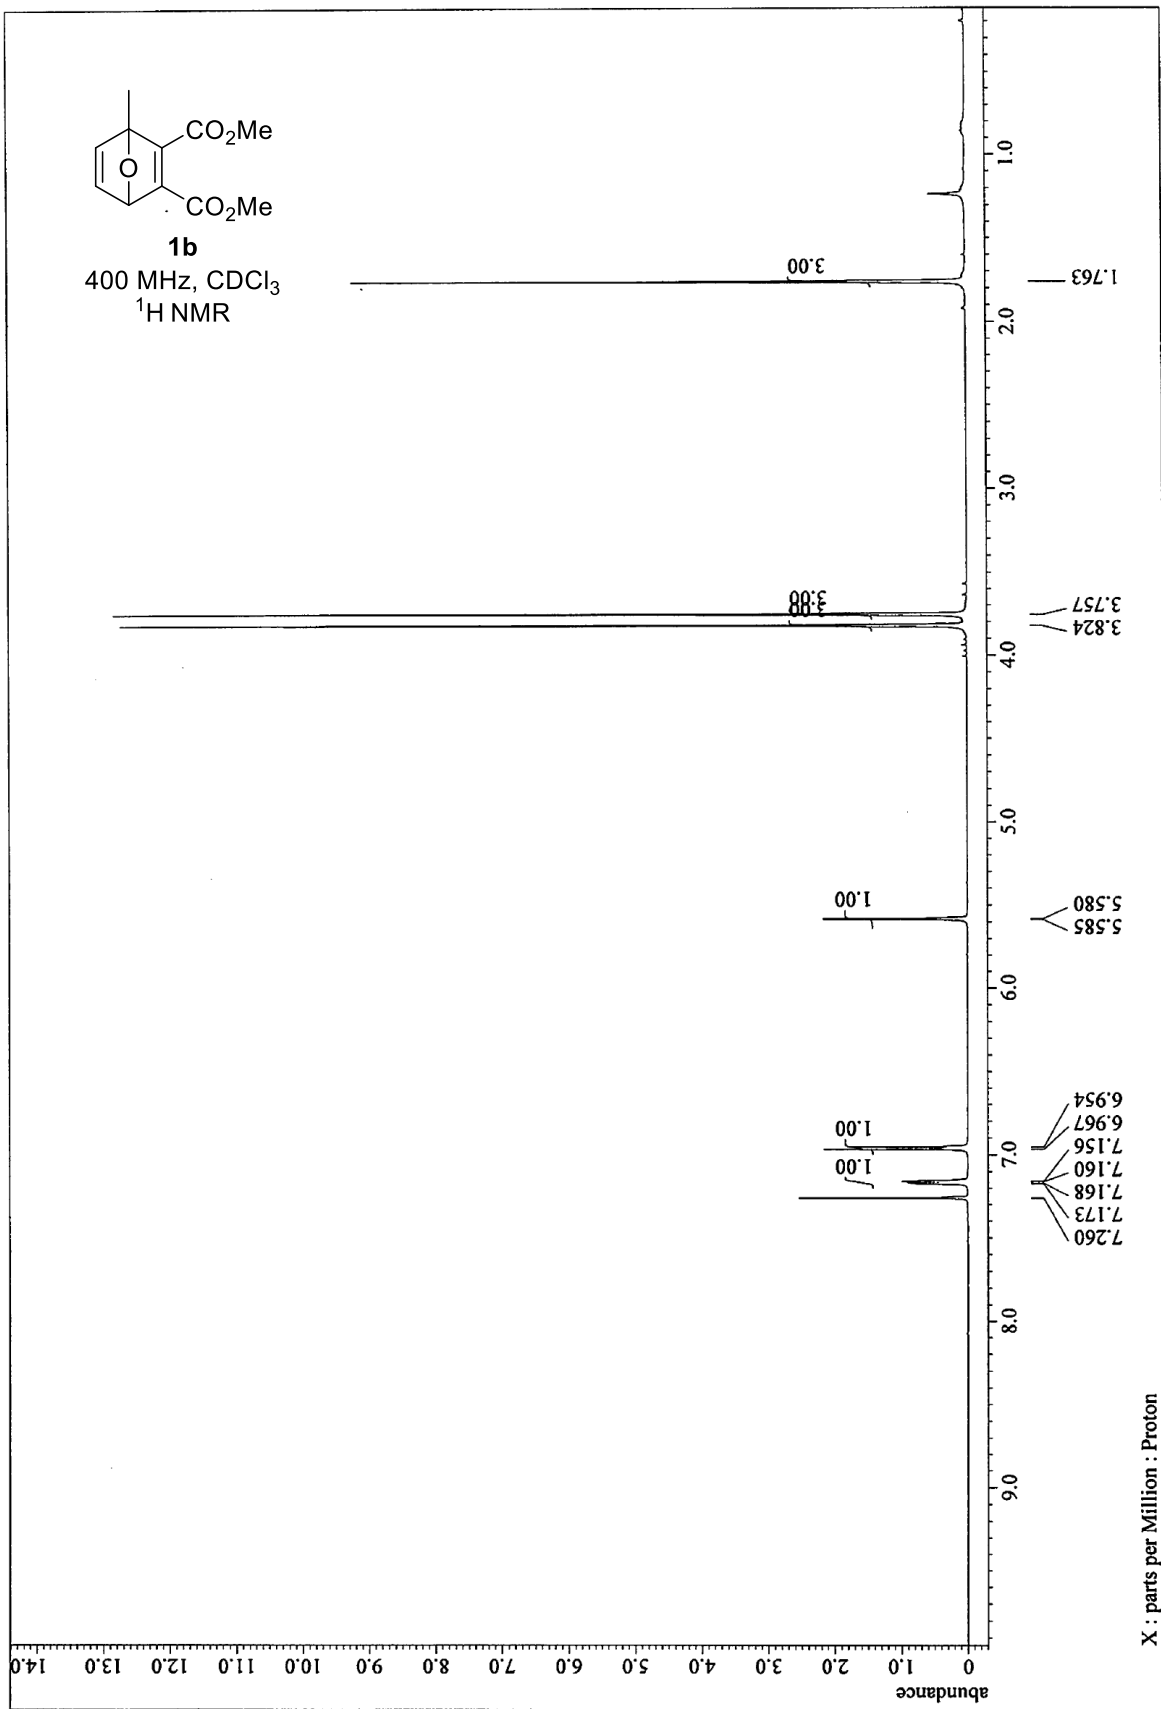



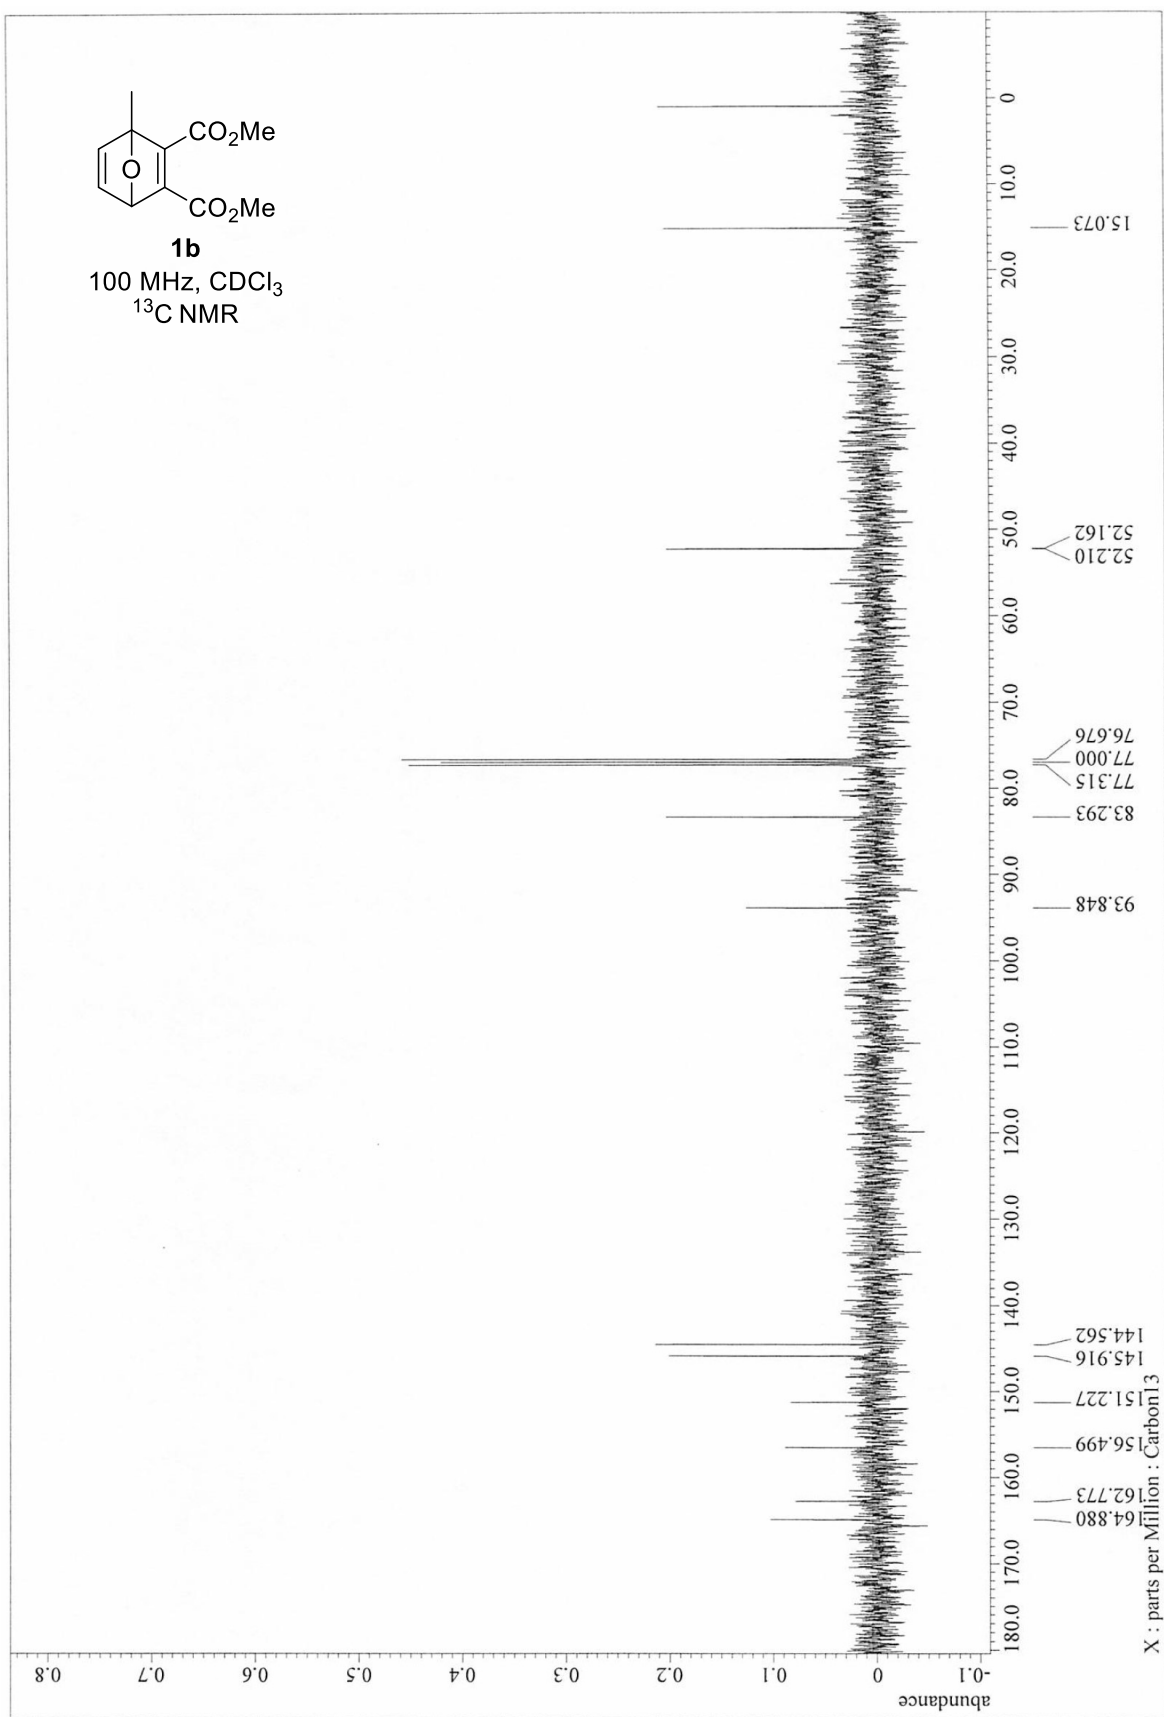

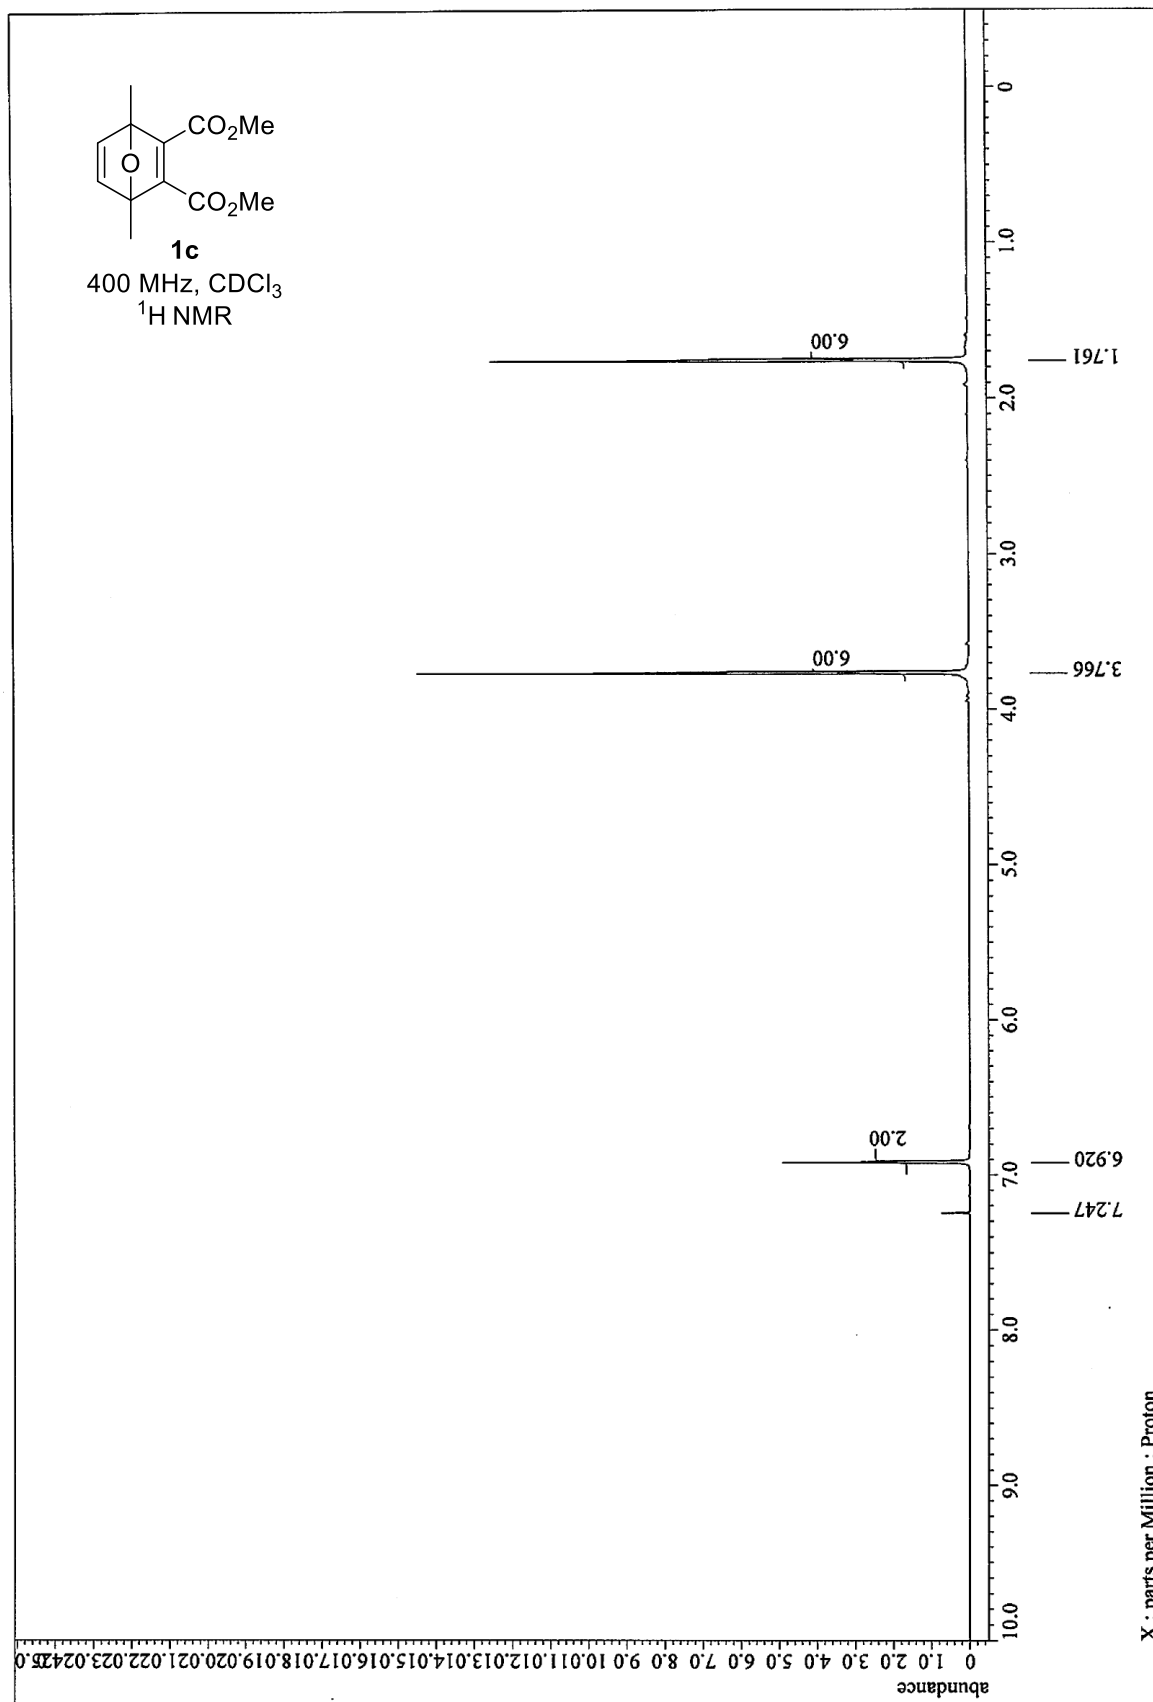

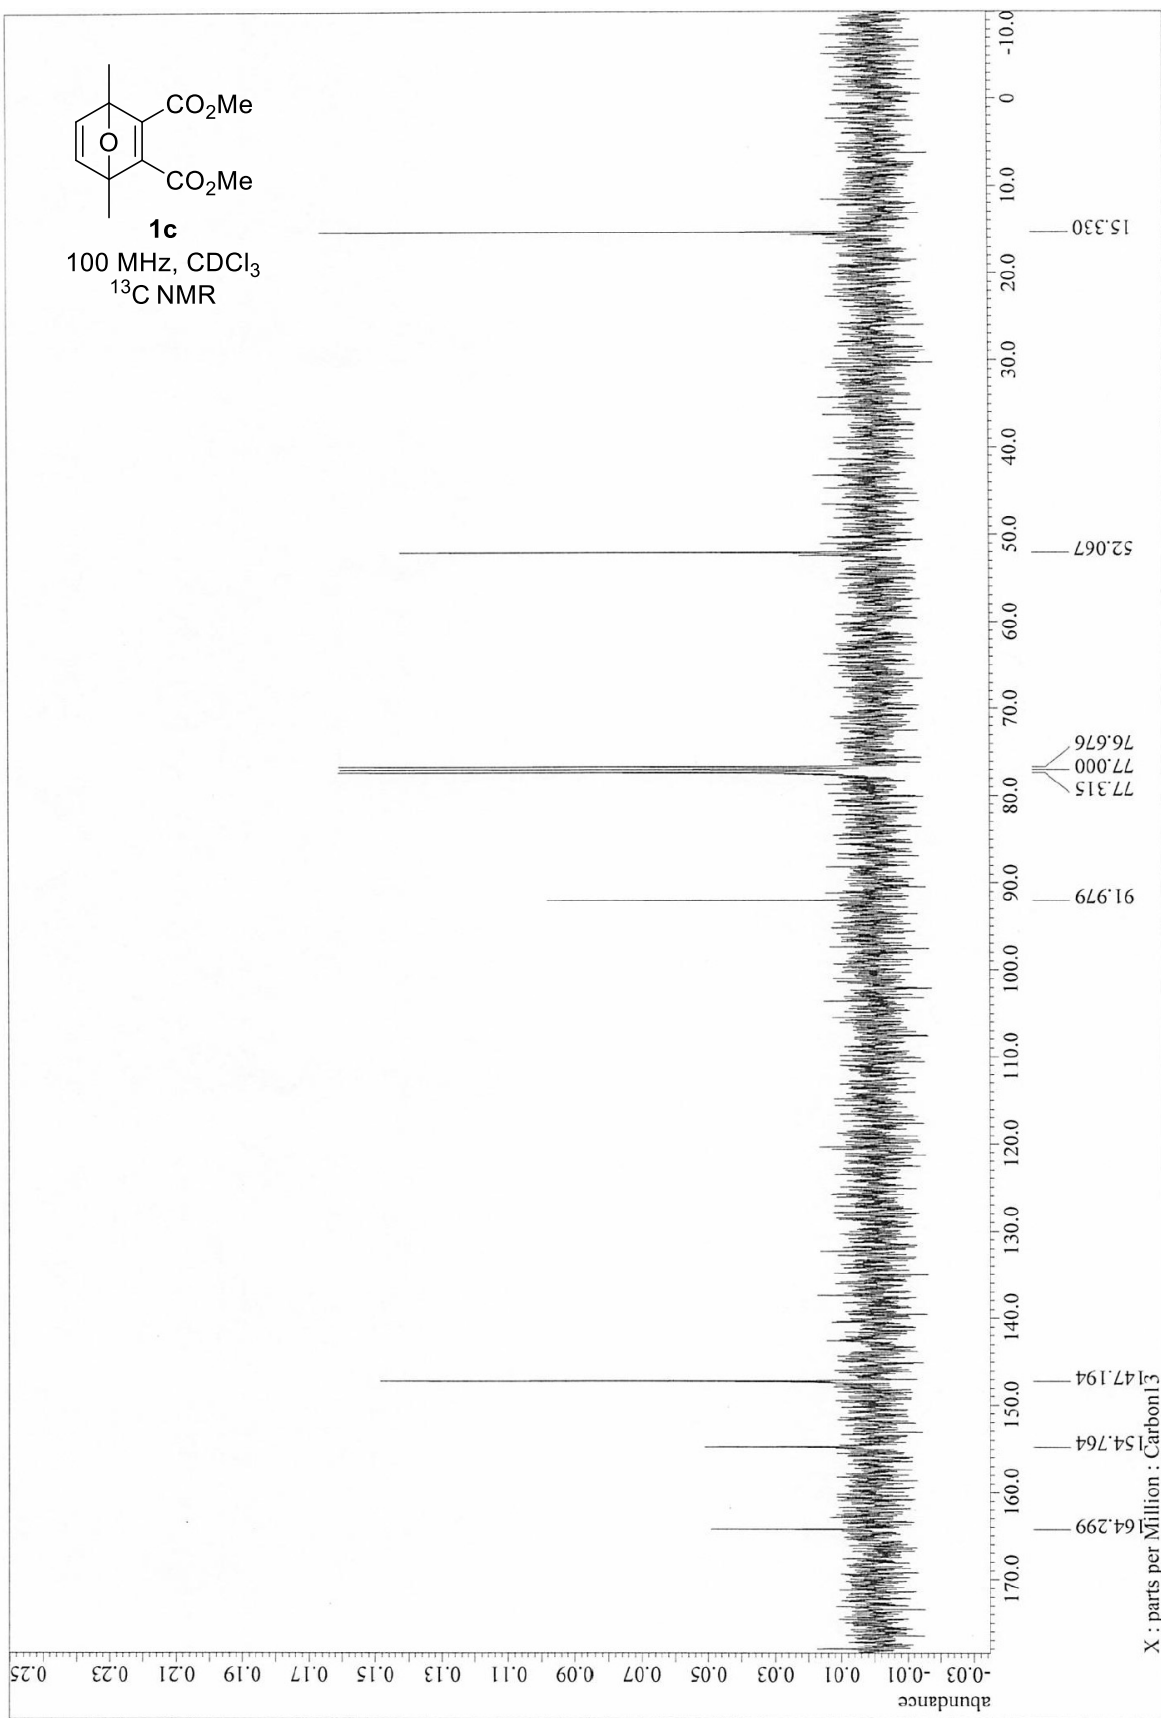

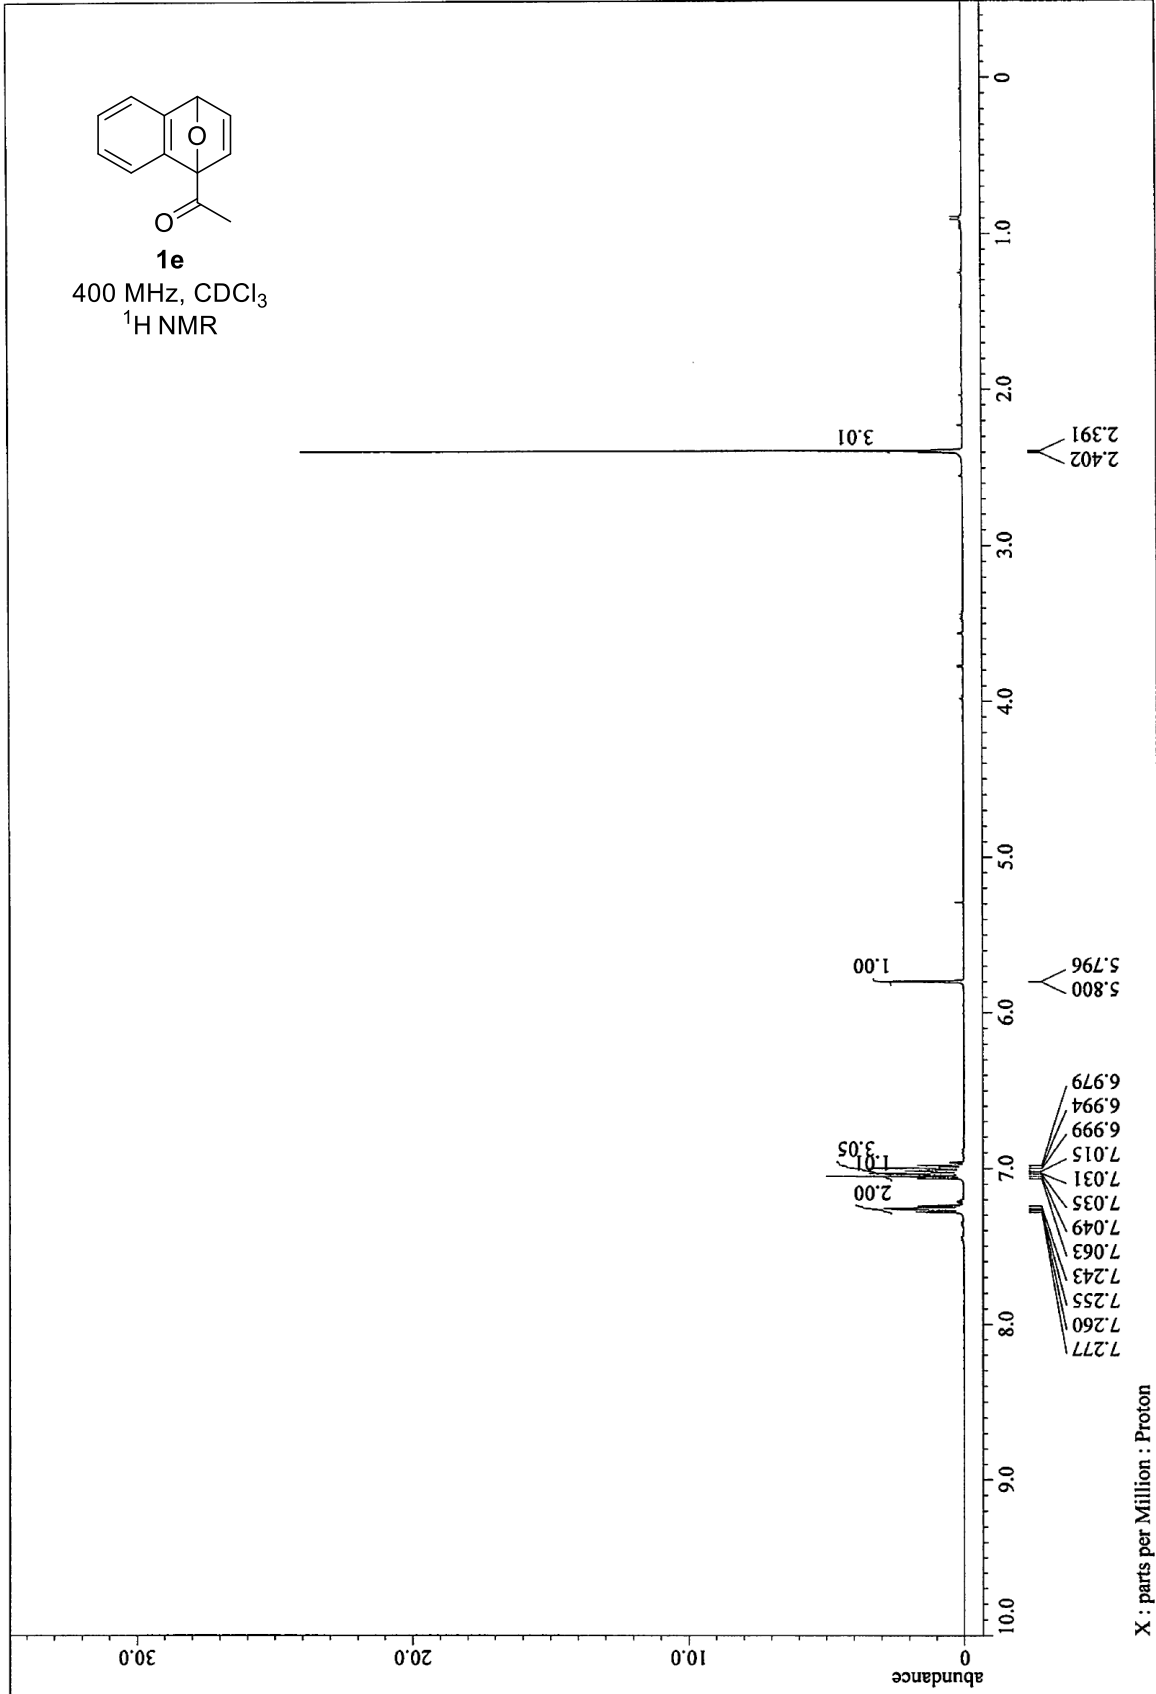

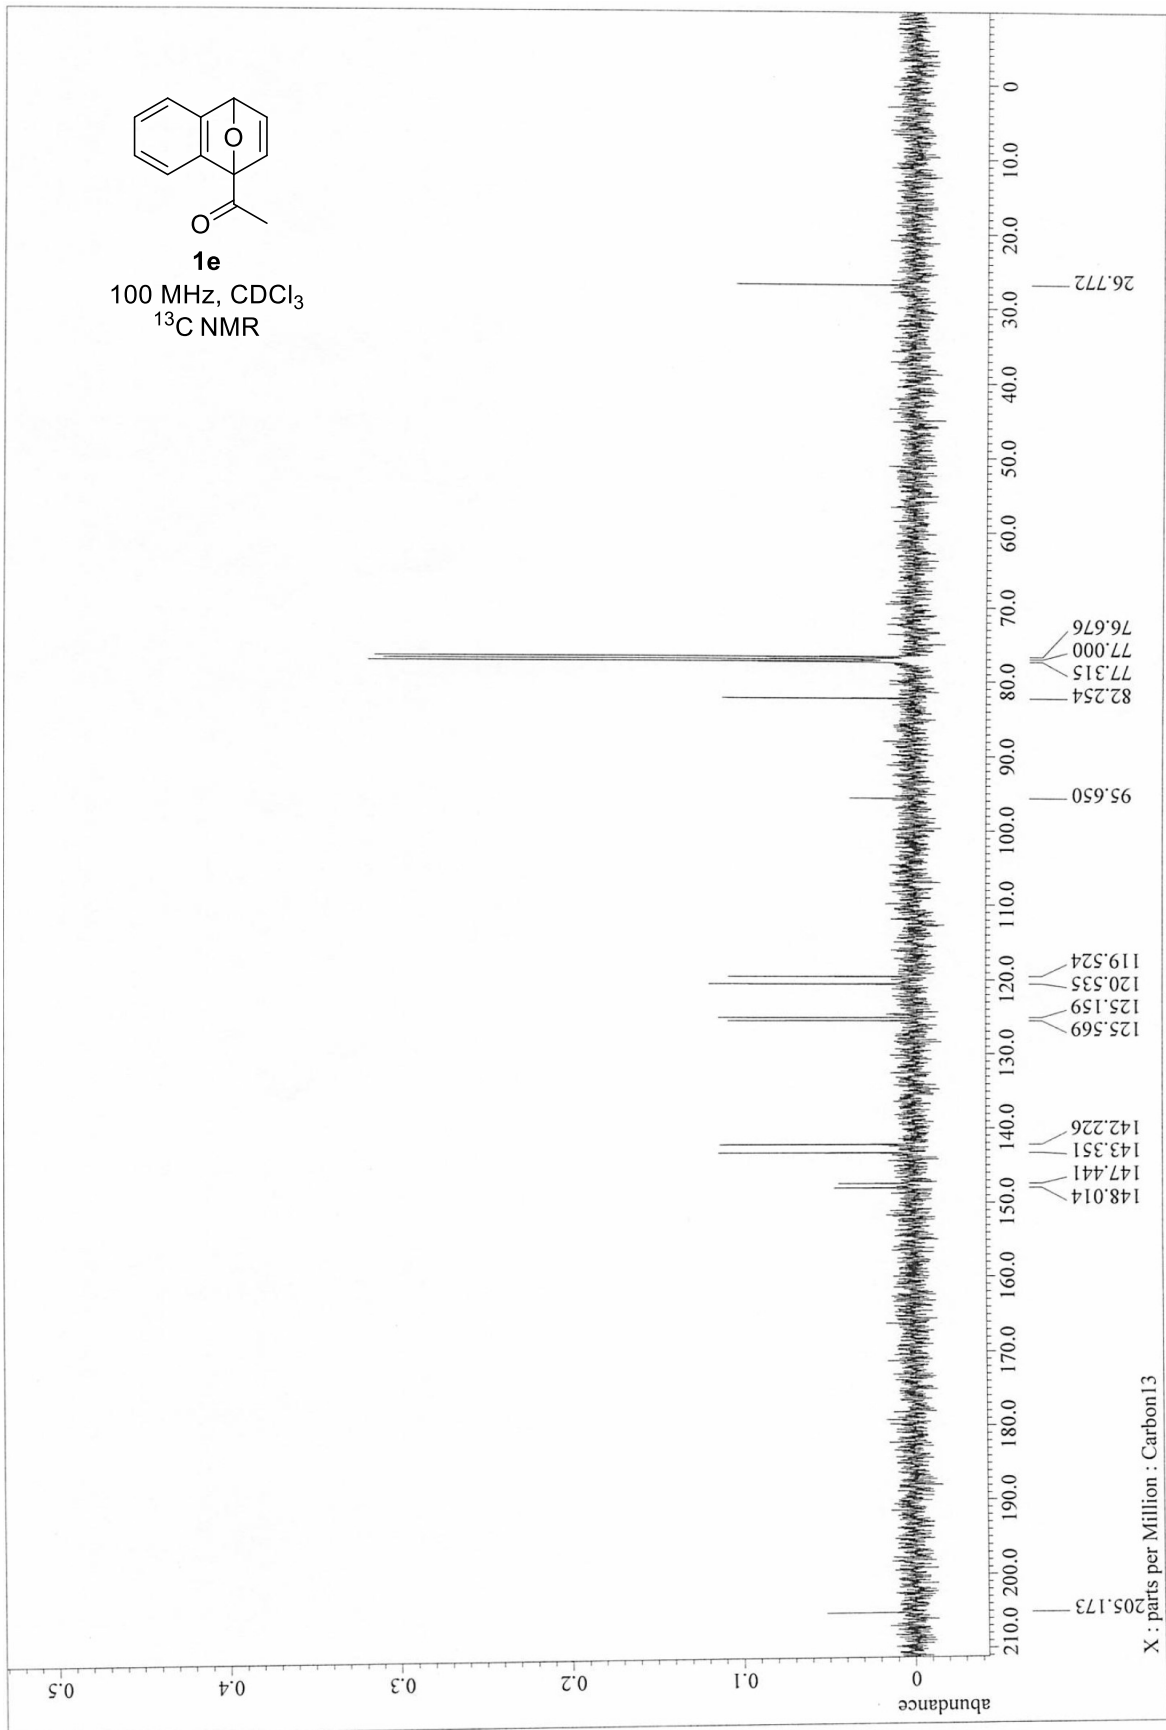

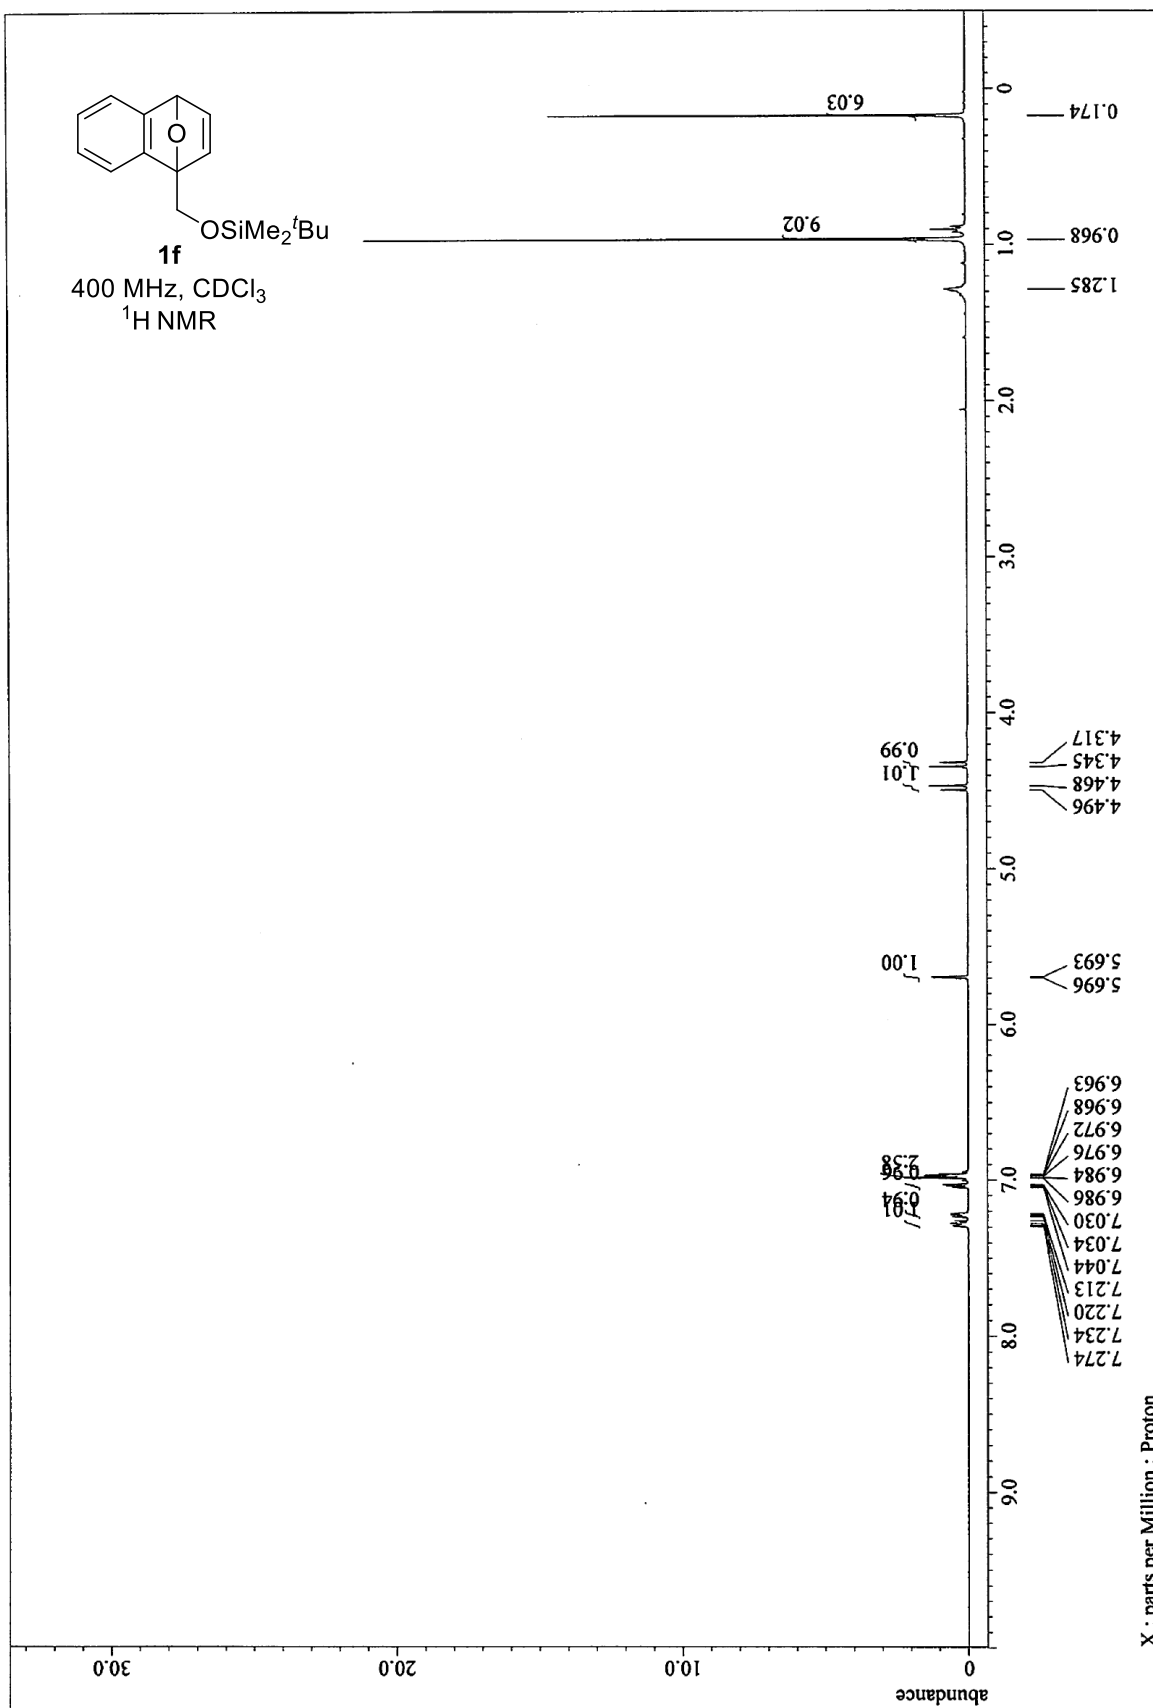

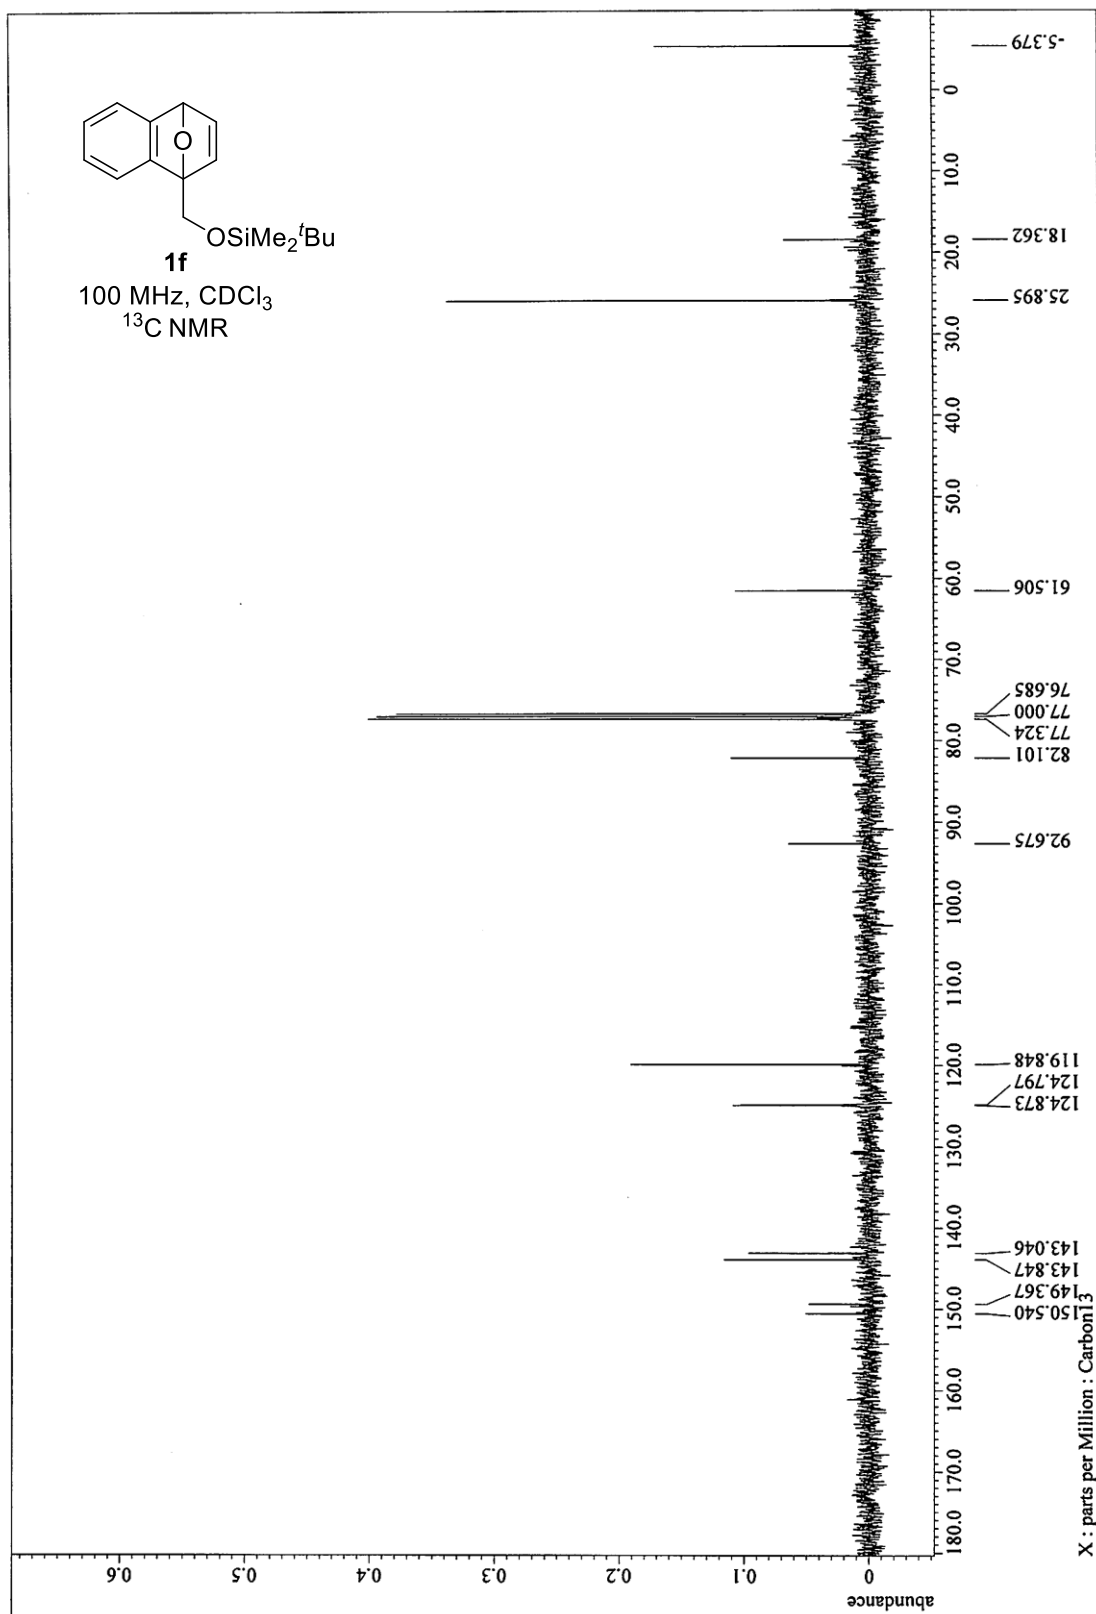

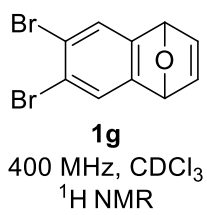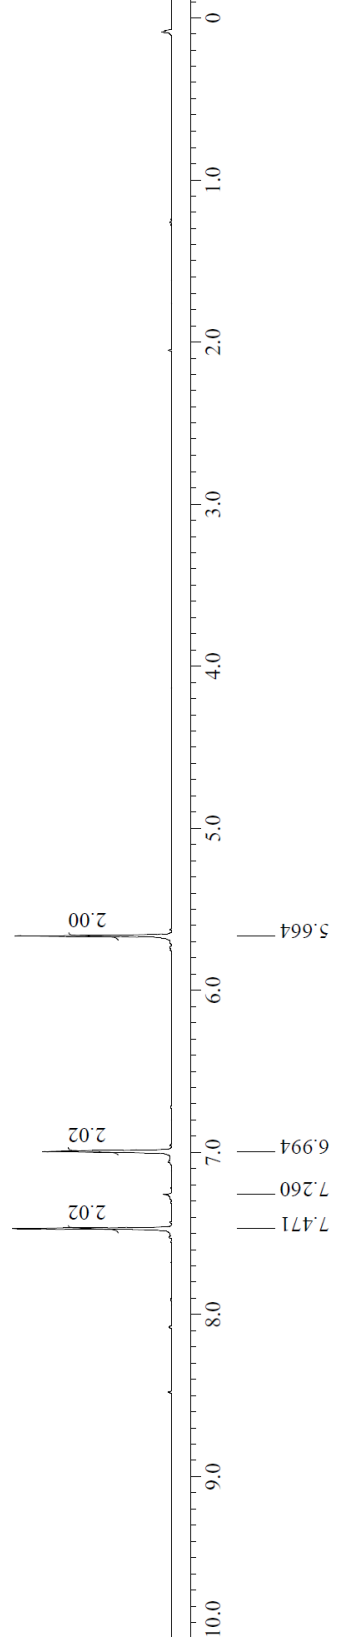



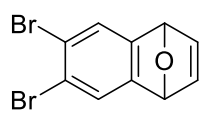

**1g**

100 MHz, CDCl<sub>3</sub>  
<sup>13</sup>C NMR

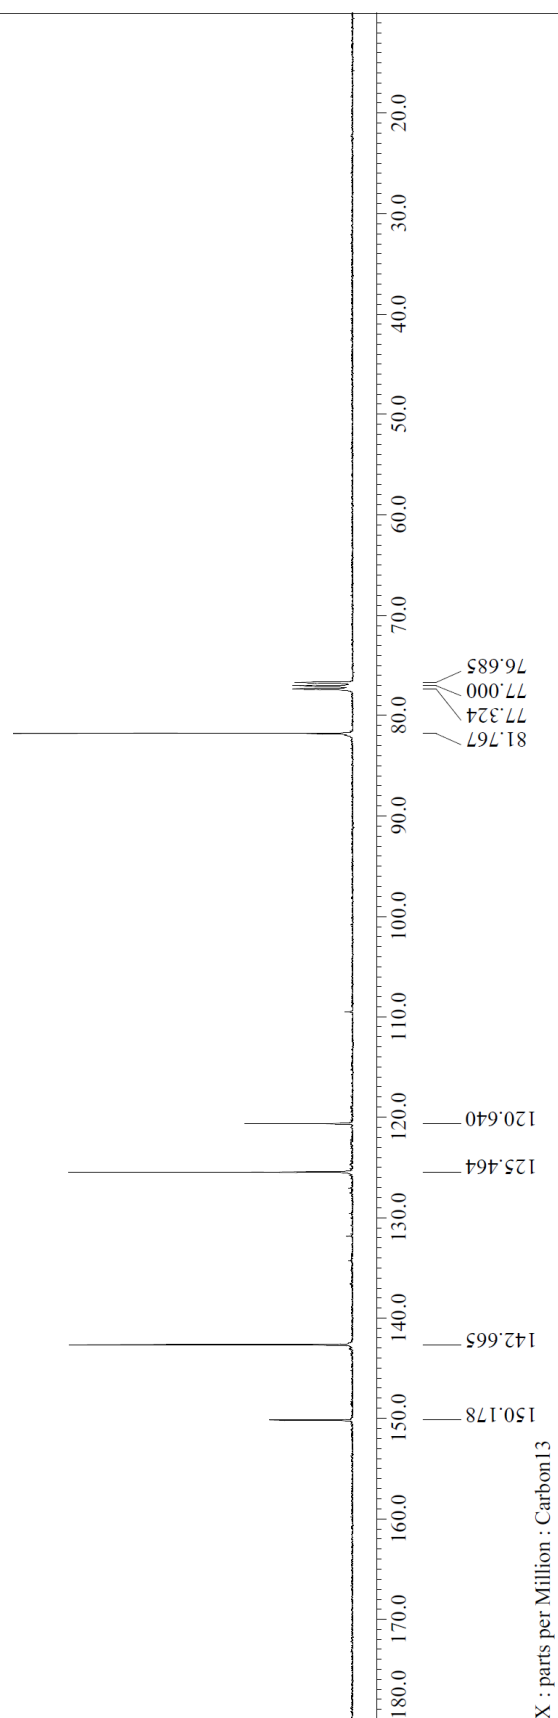

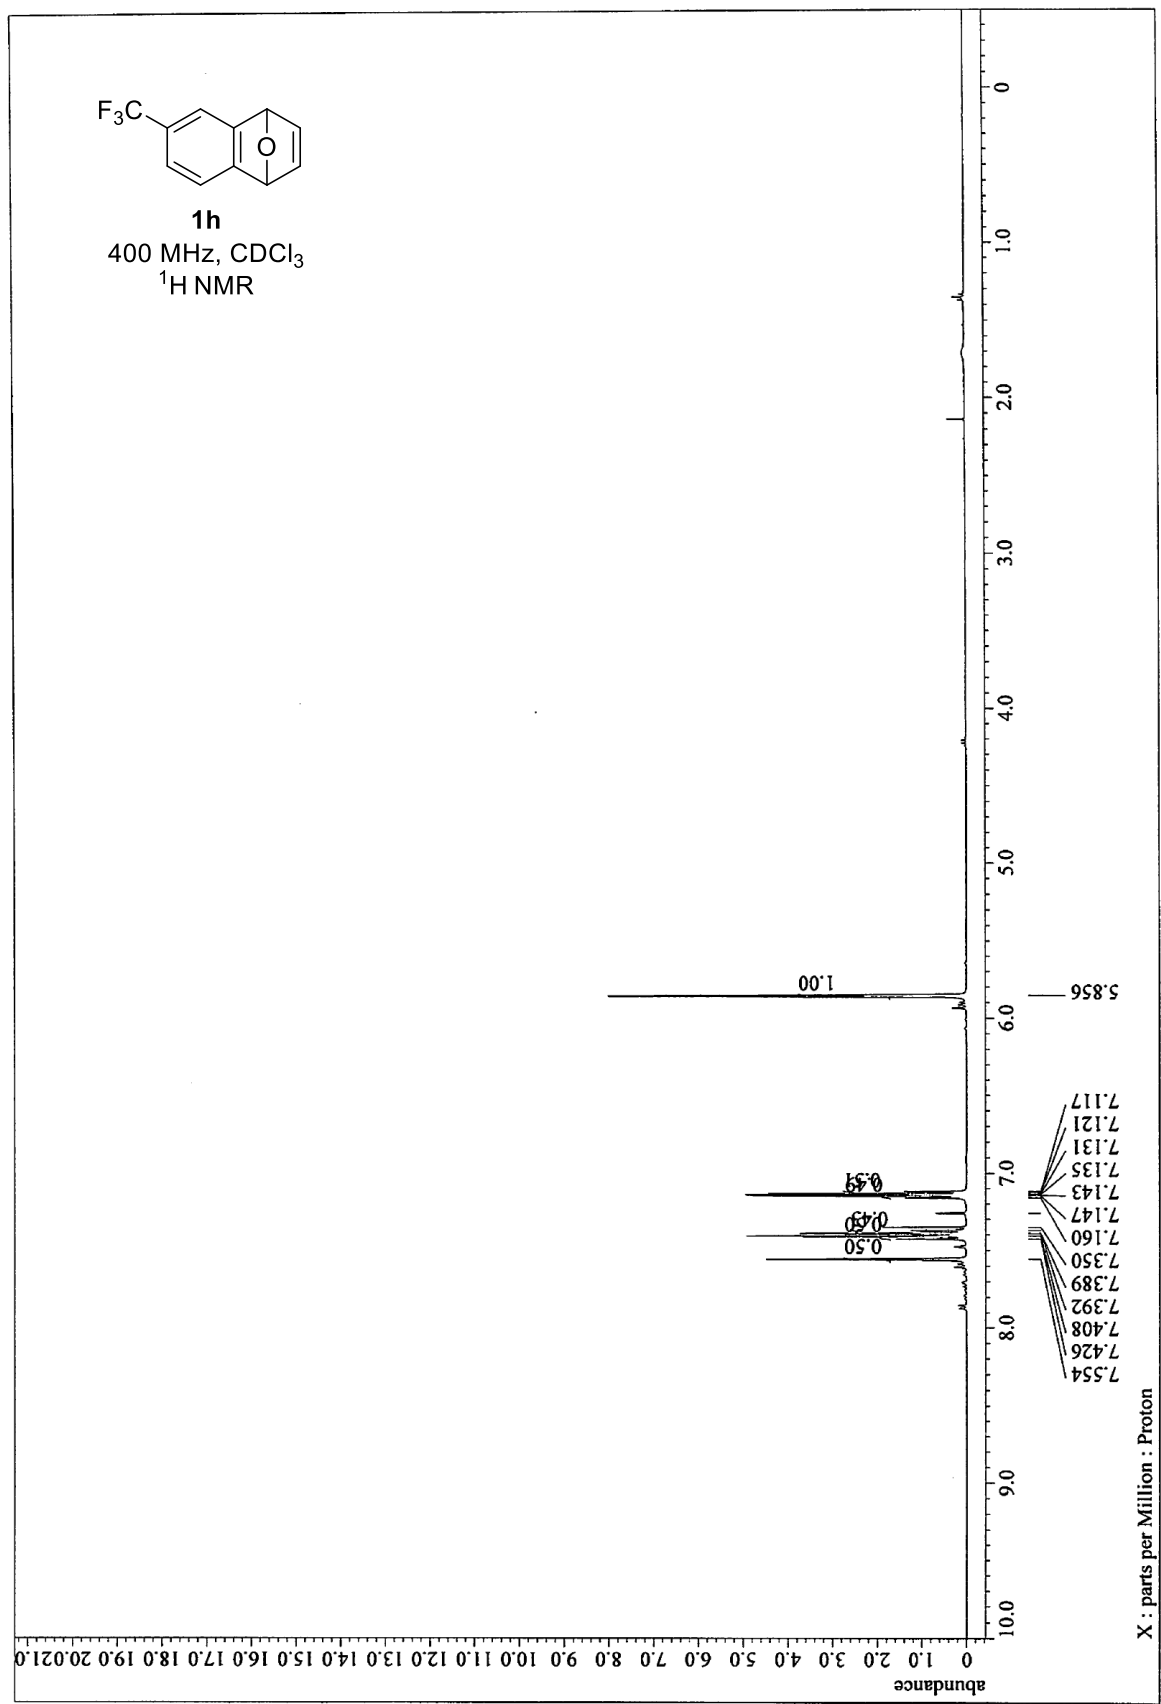

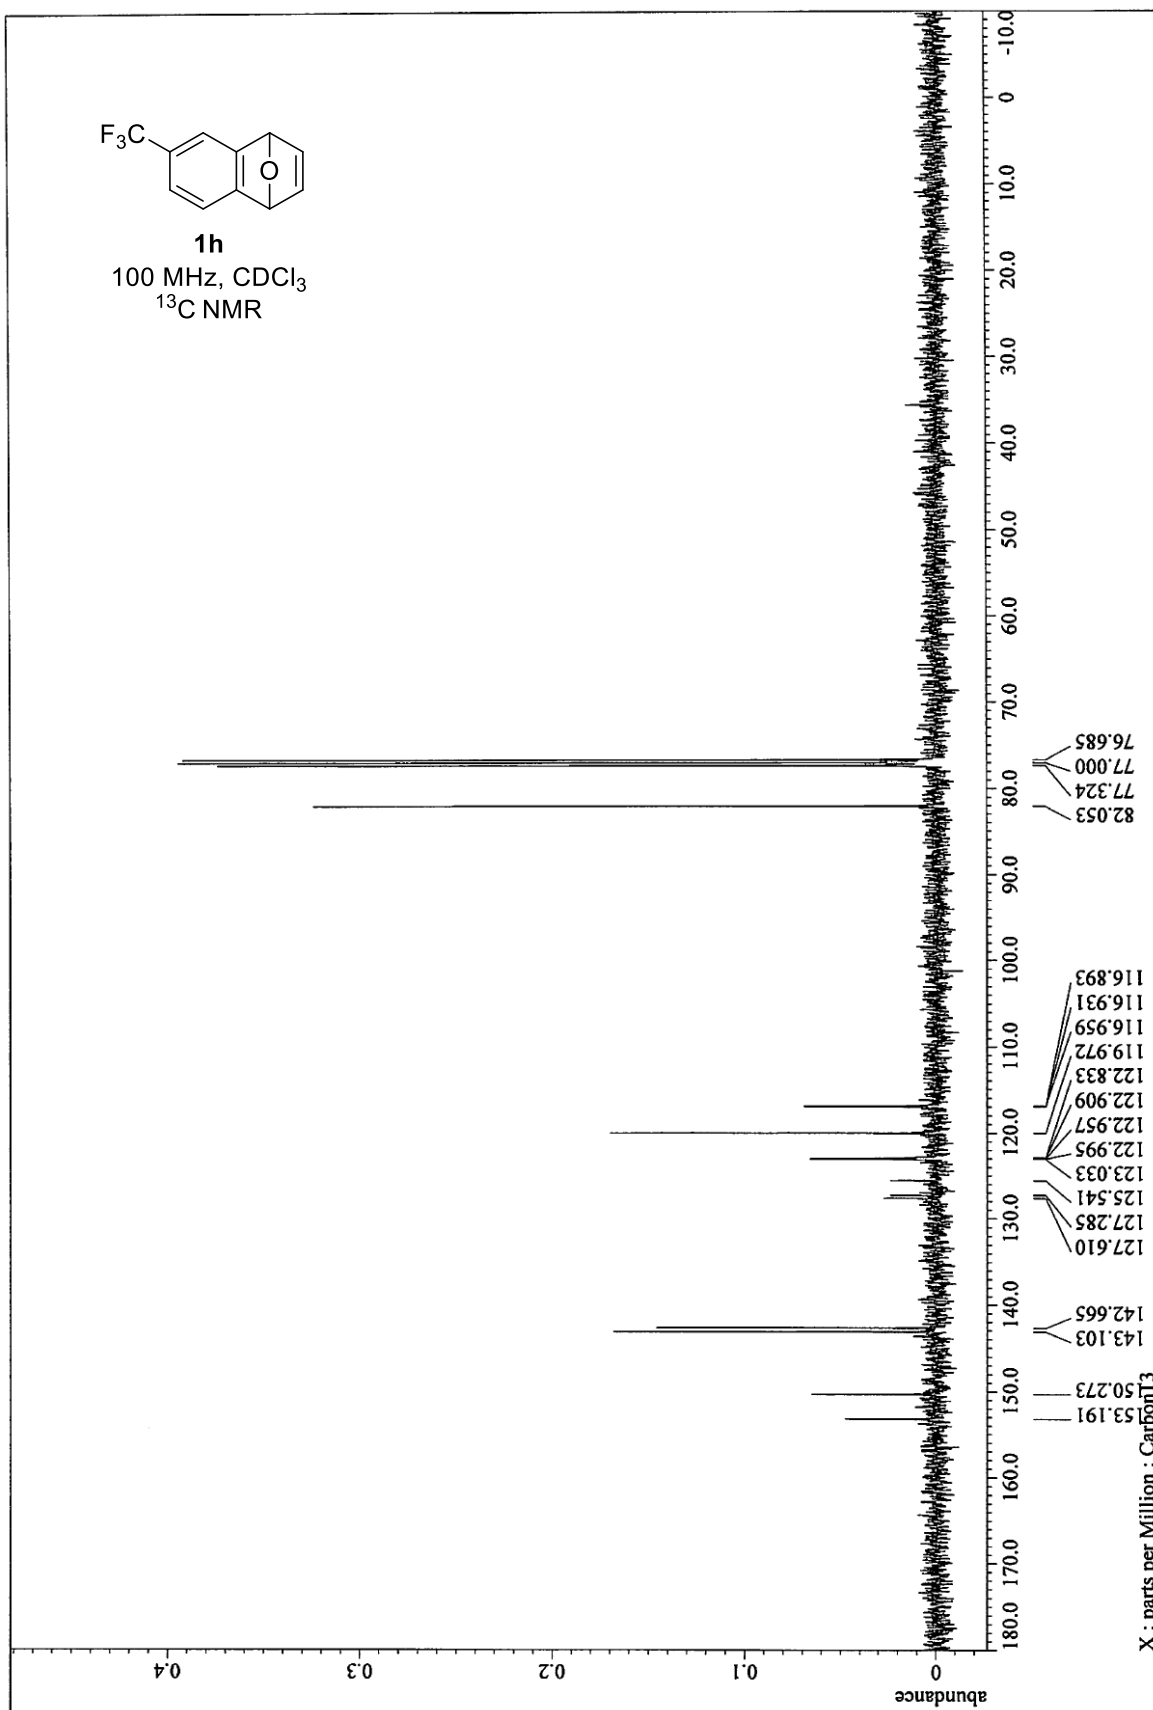

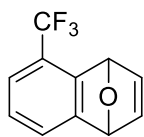

**1i**

400 MHz, CDCl<sub>3</sub>  
<sup>1</sup>H NMR

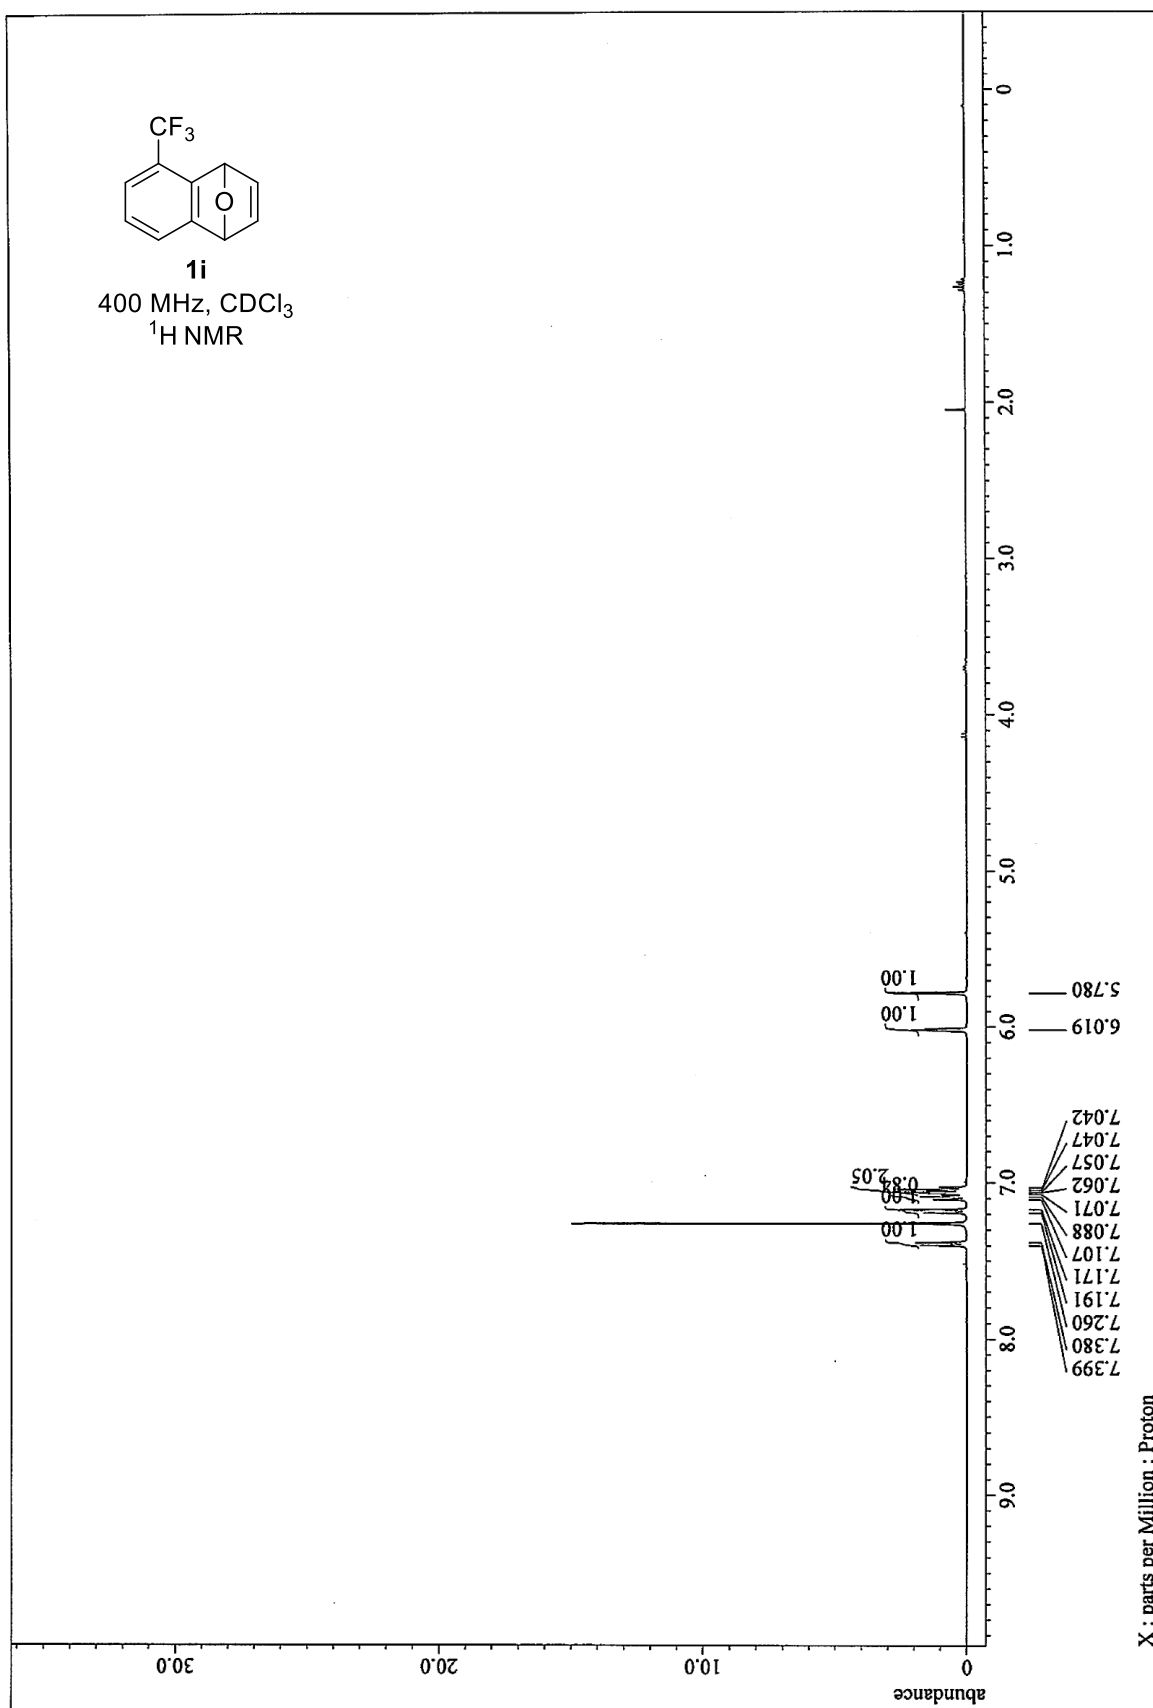

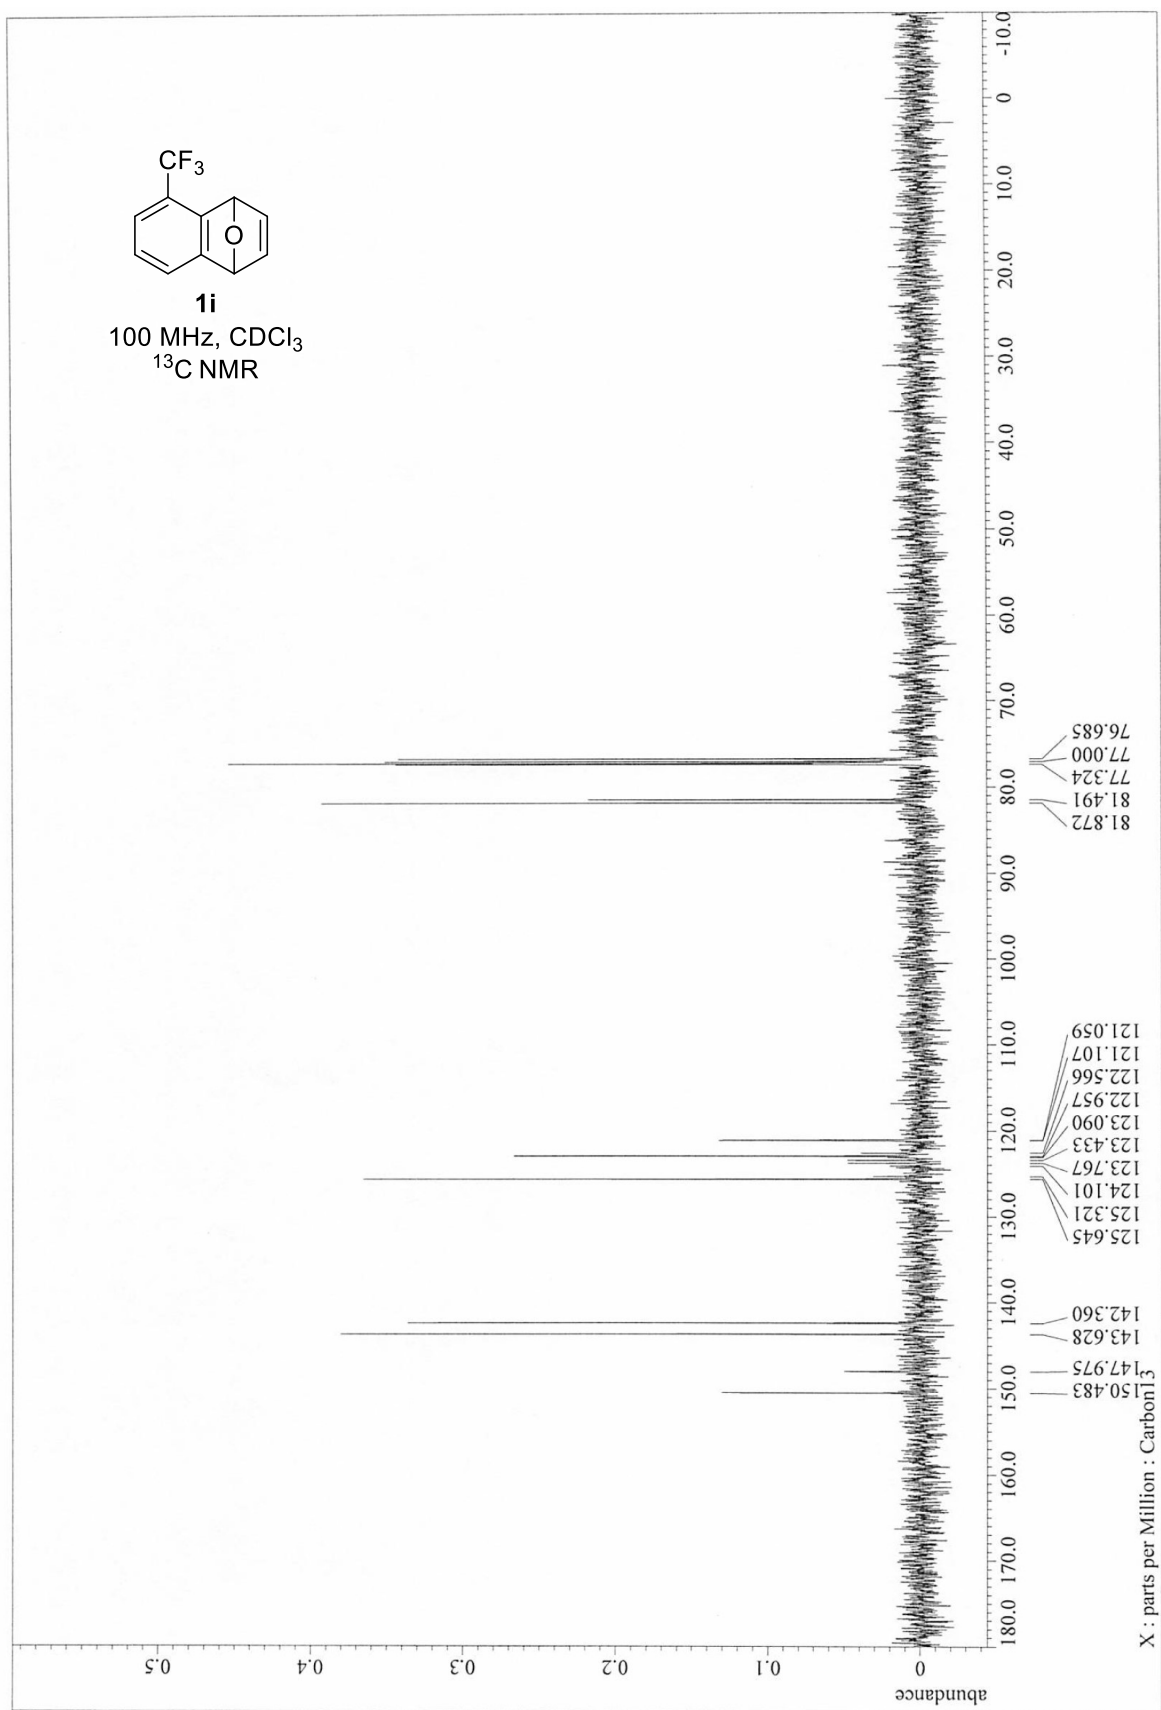

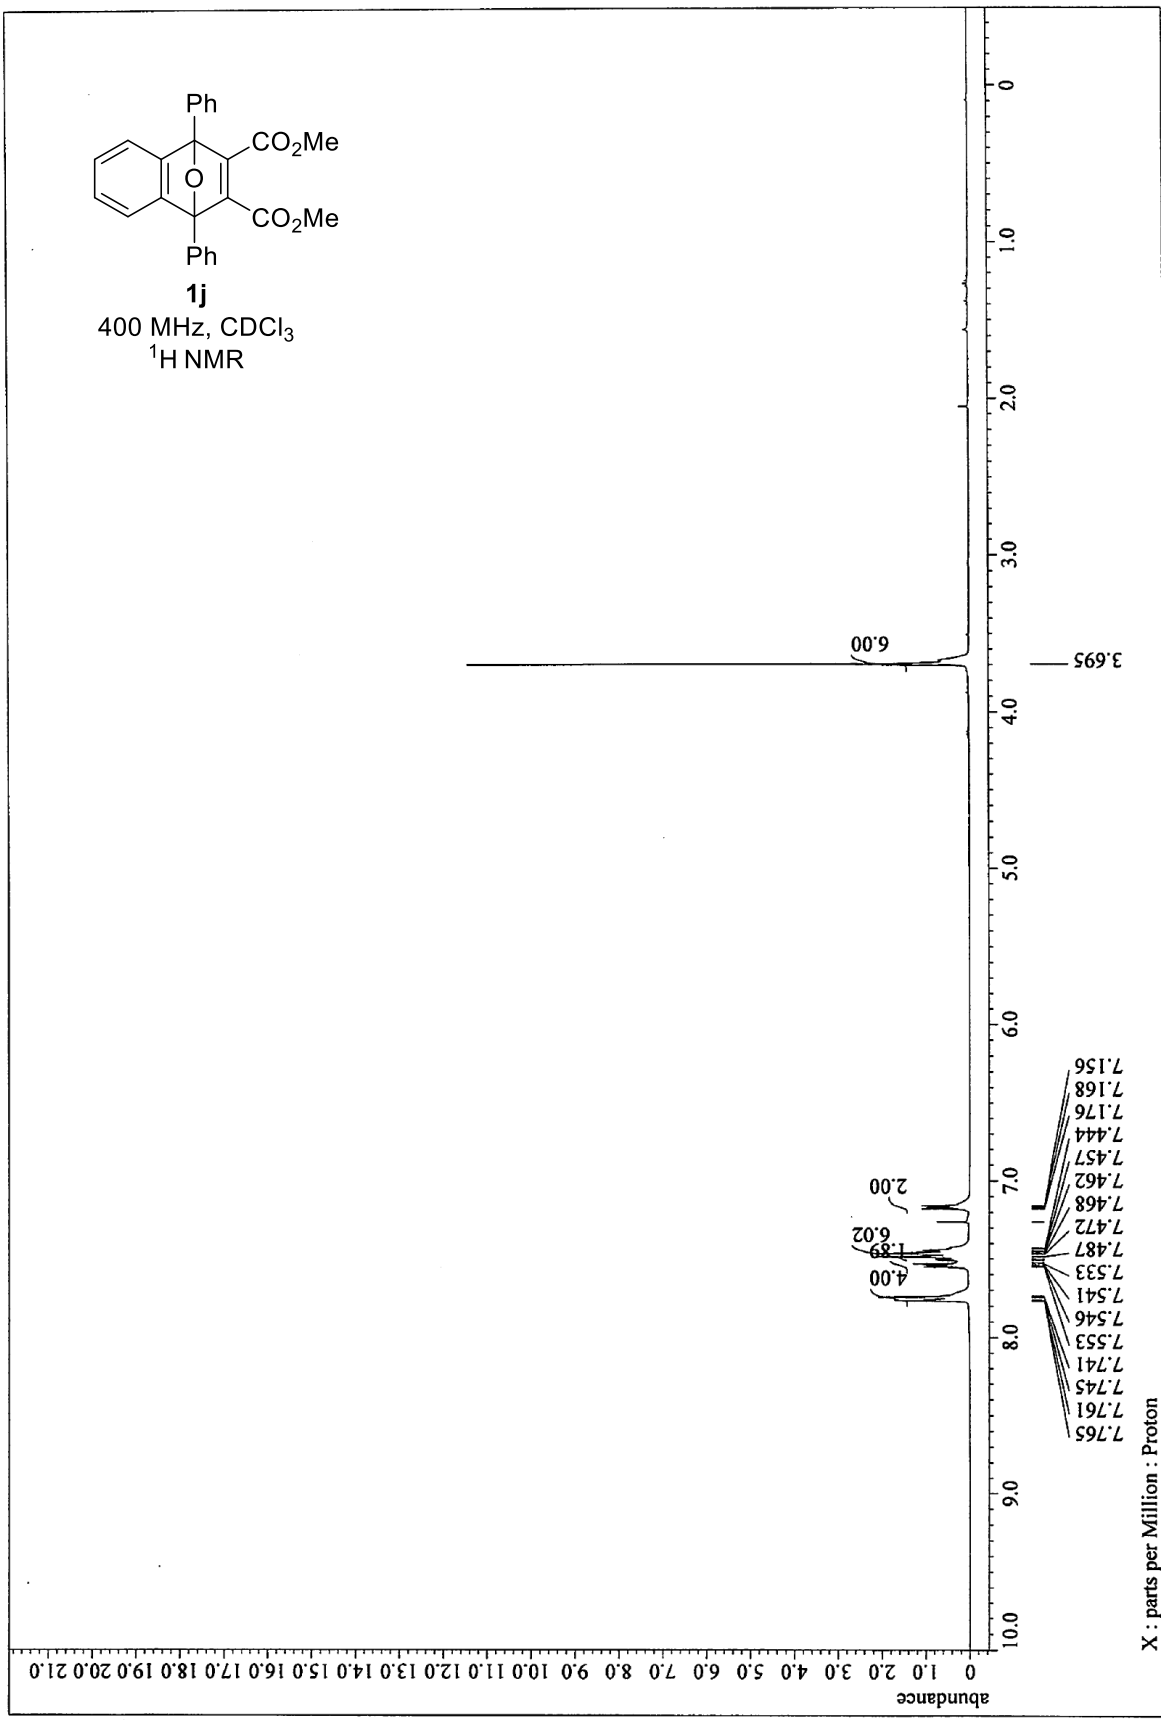

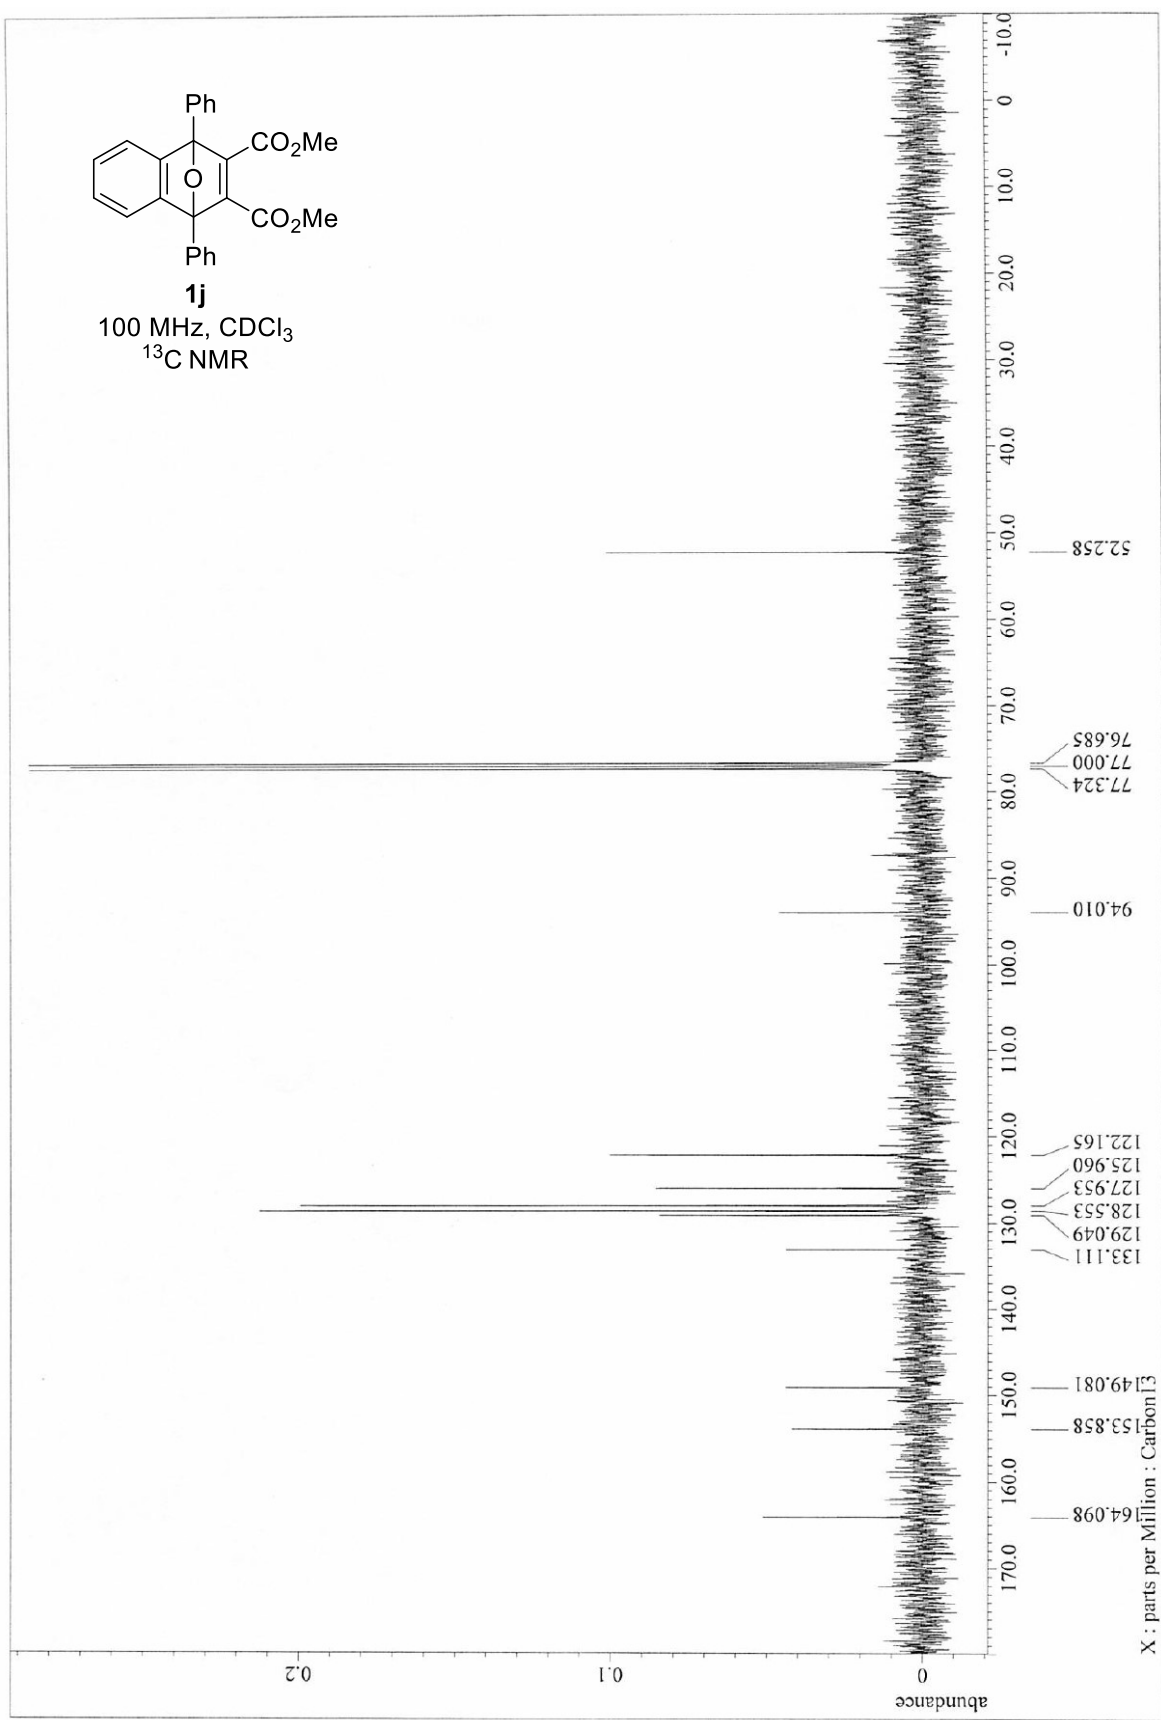

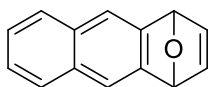

**1k**  
400 MHz, CDCl<sub>3</sub>  
<sup>1</sup>H NMR

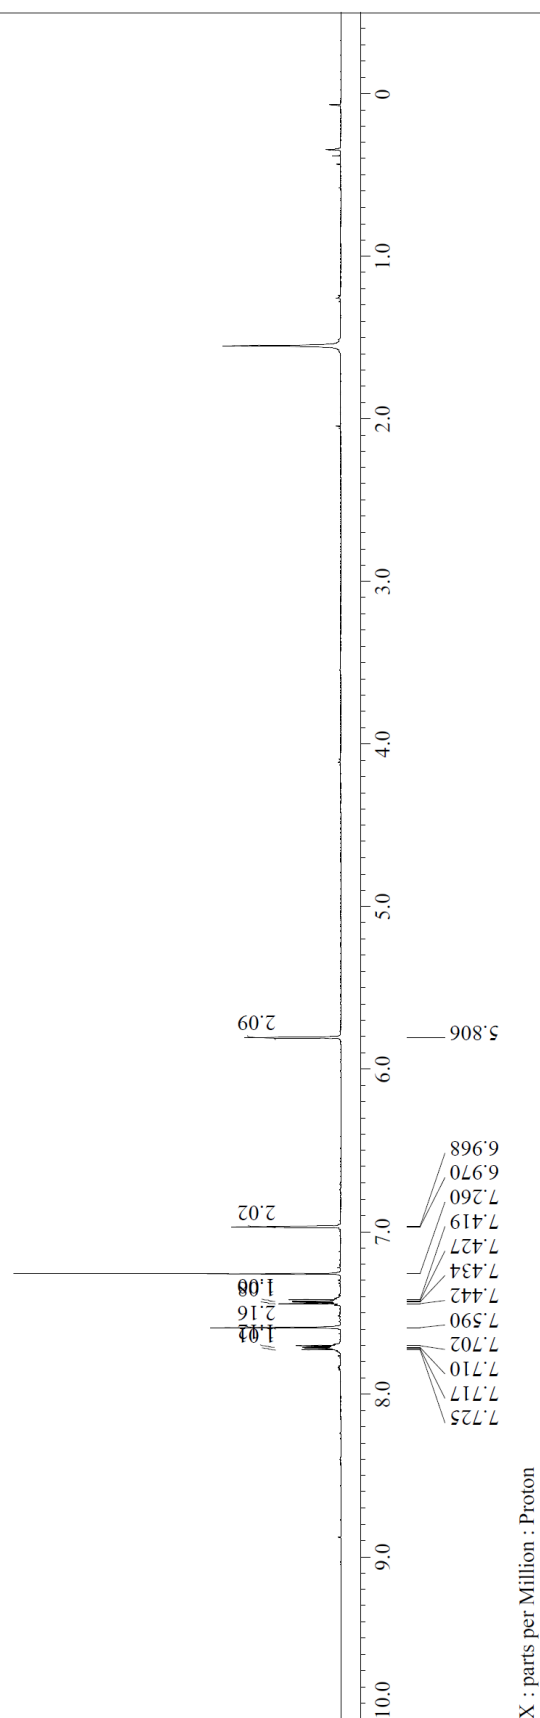



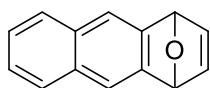

**1k**

100 MHz, CDCl<sub>3</sub>  
<sup>13</sup>C NMR

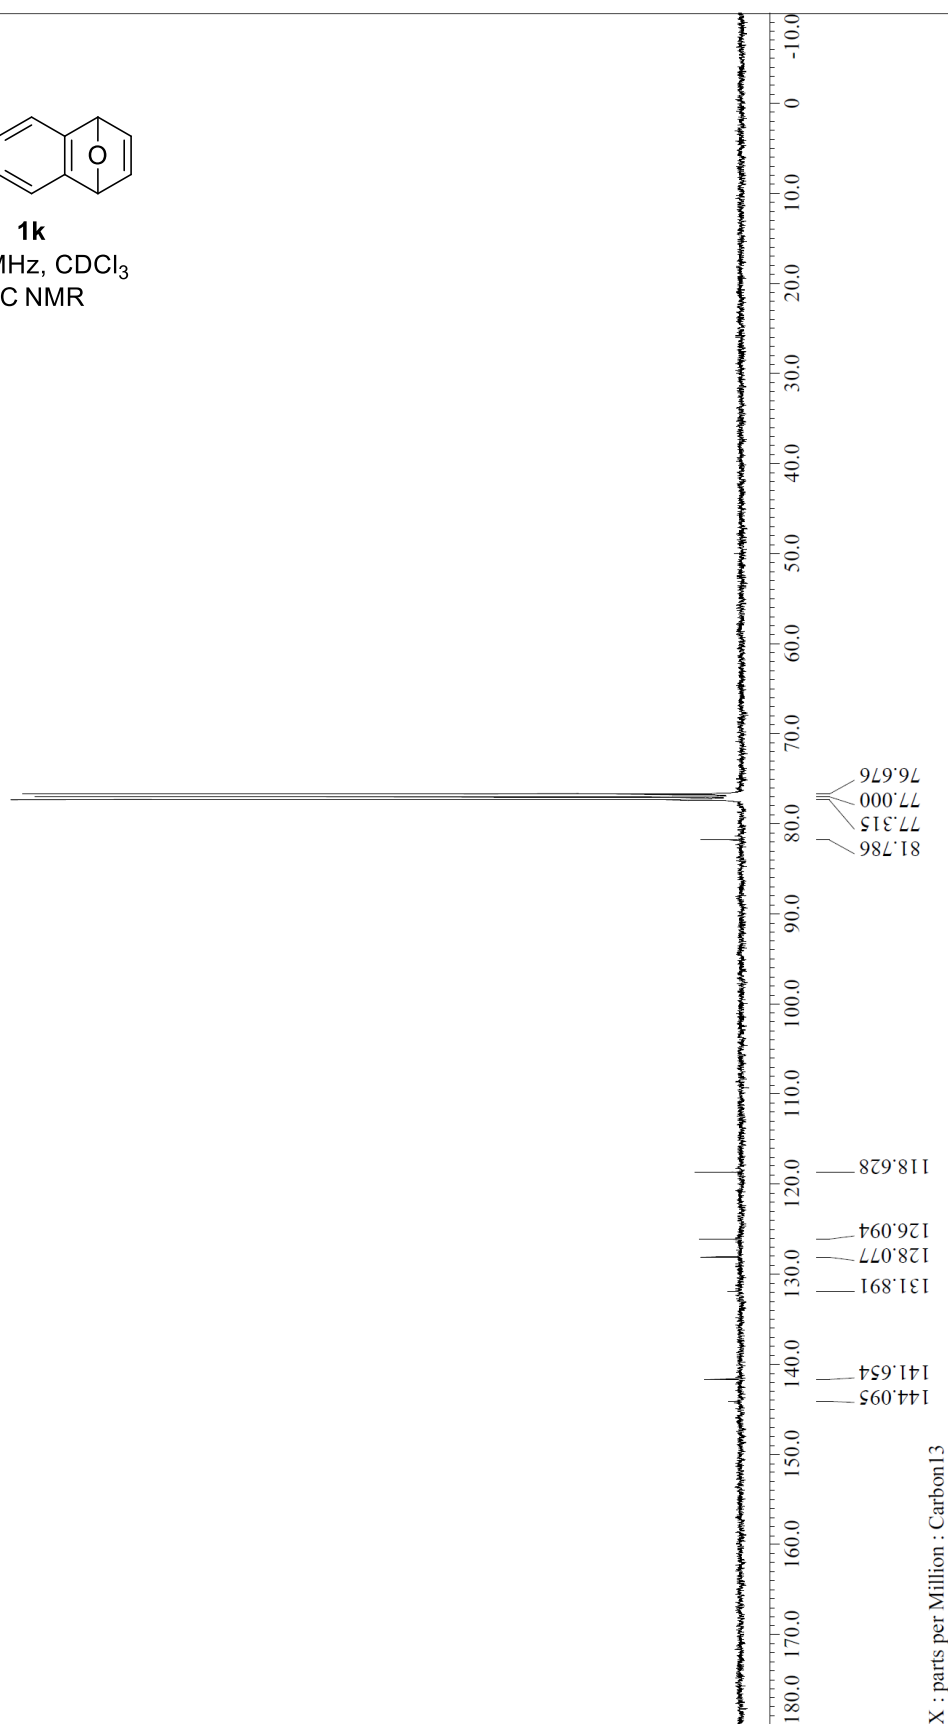

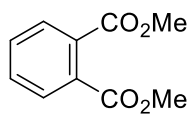

**2a**

400 MHz, CDCl<sub>3</sub>  
<sup>1</sup>H NMR

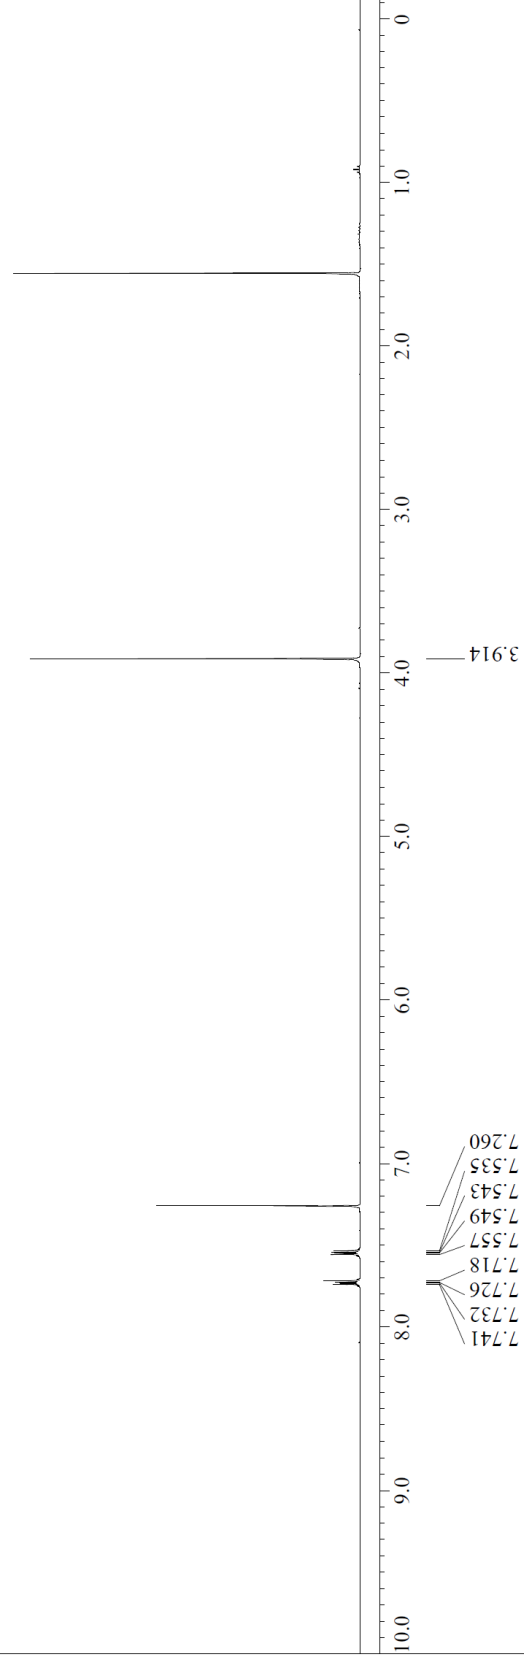

X : parts per Million : Proton

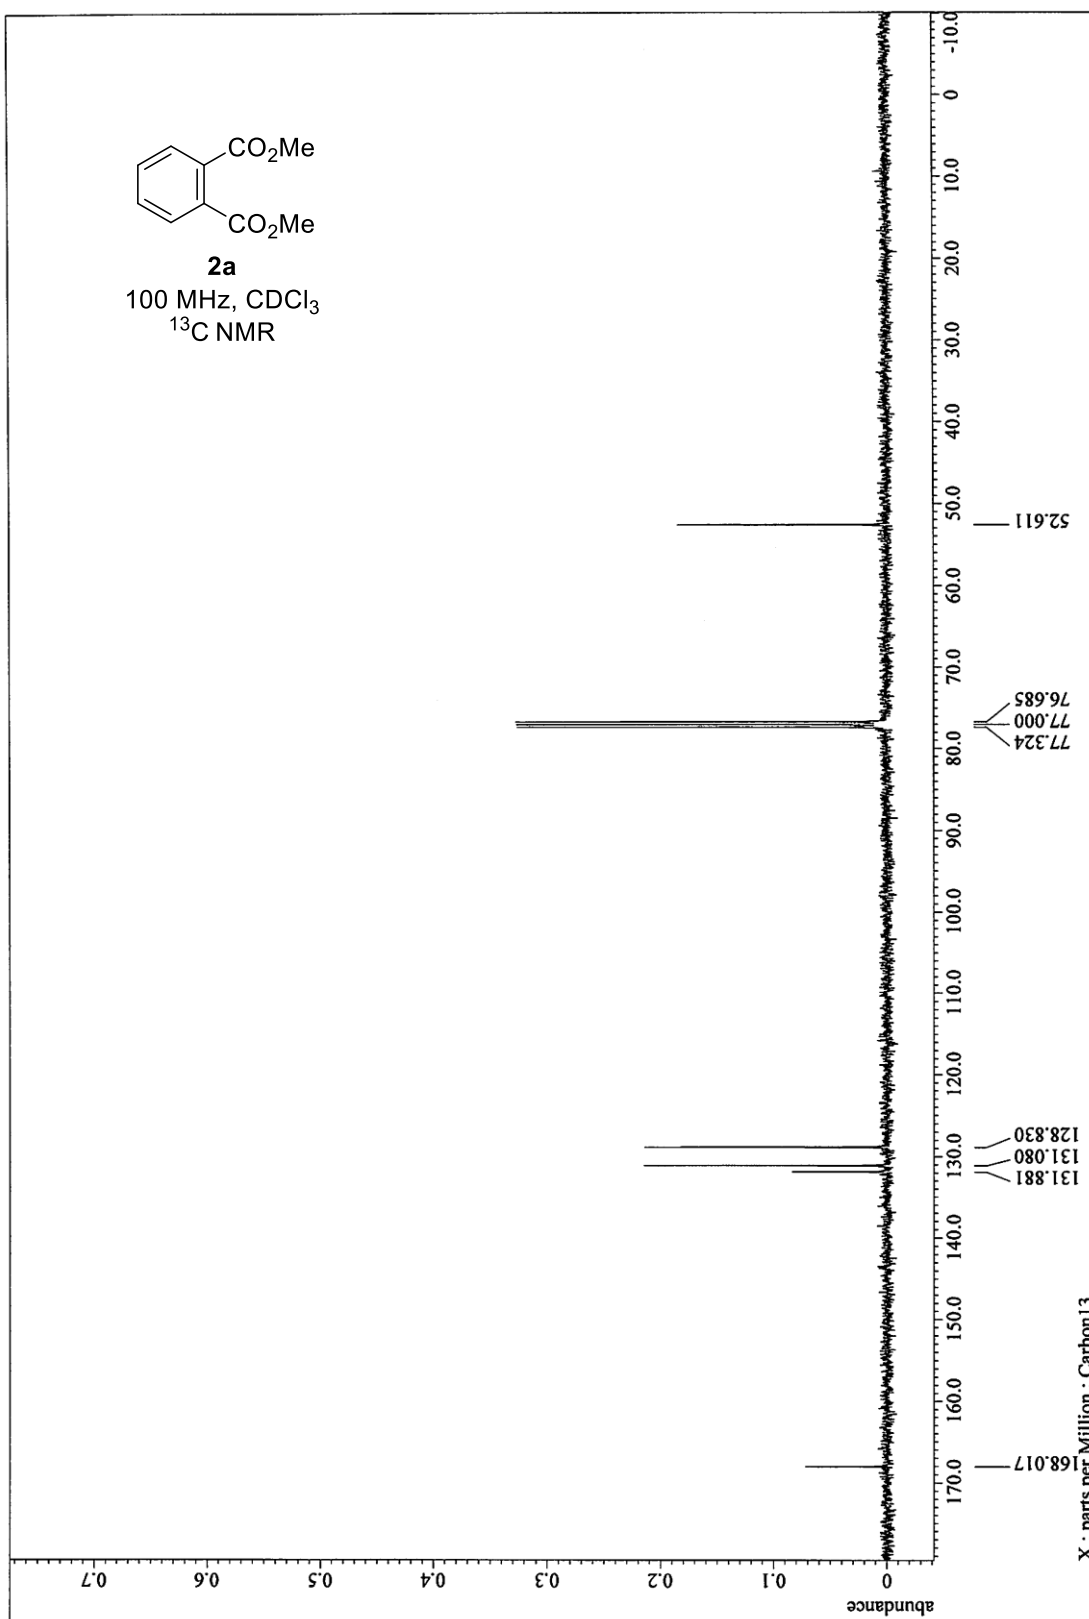

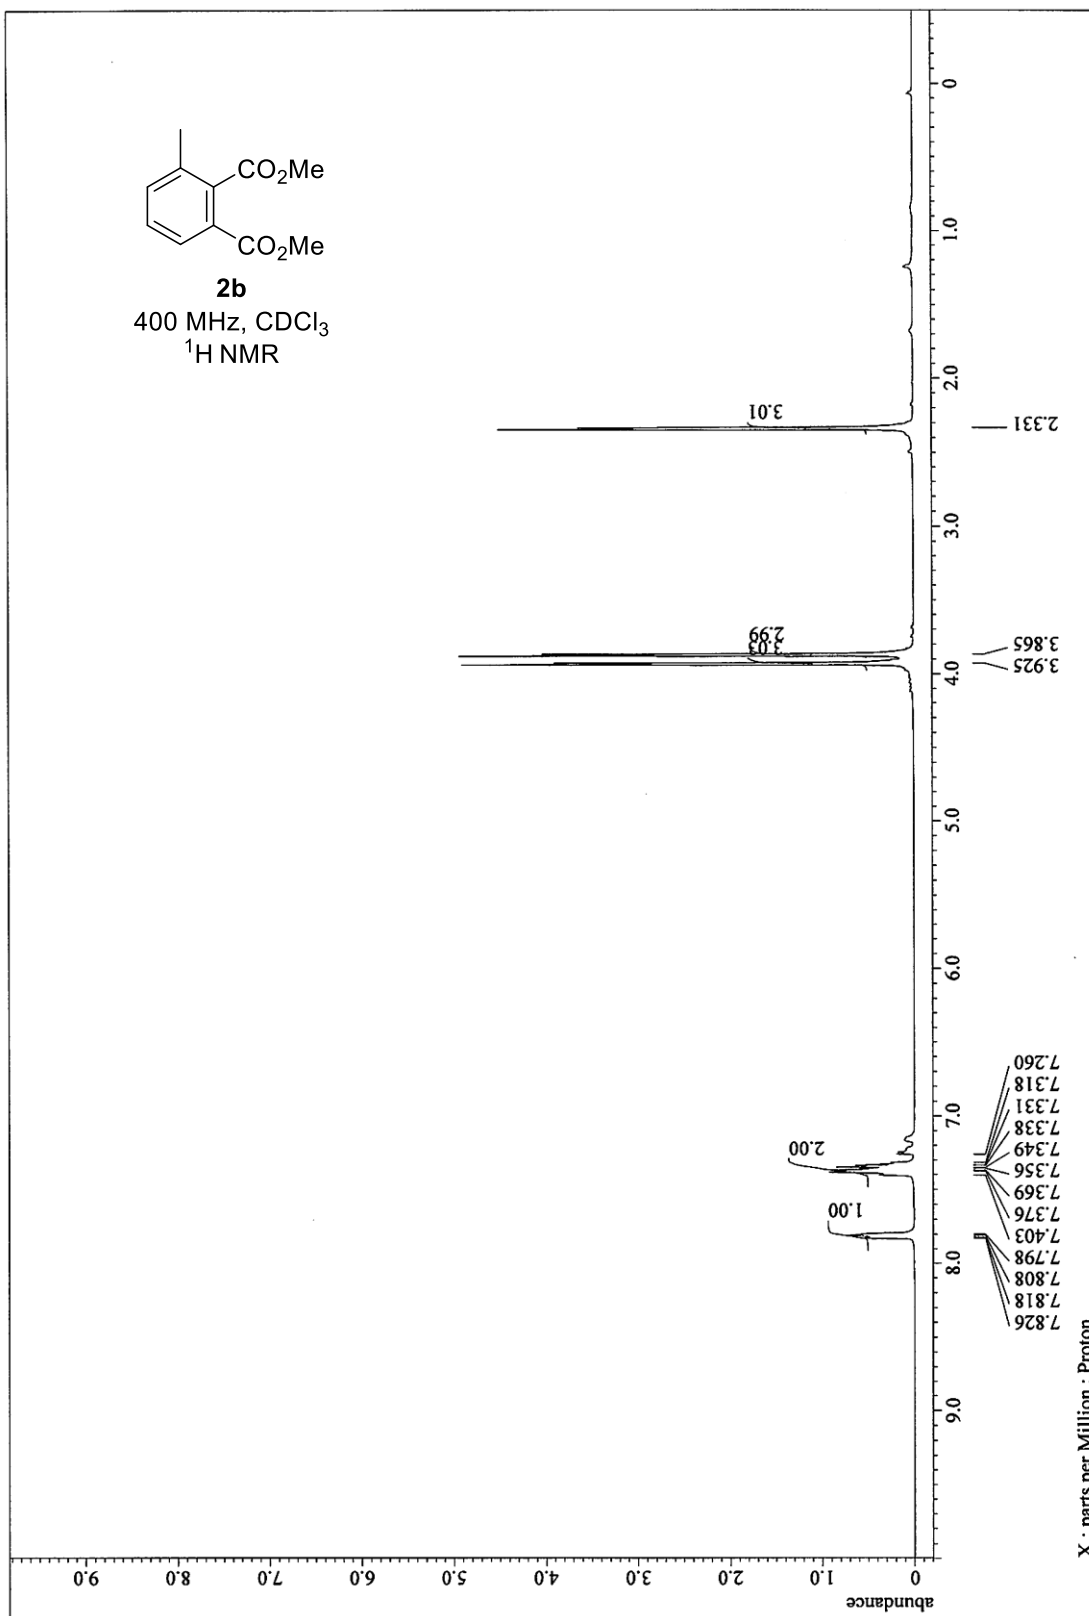

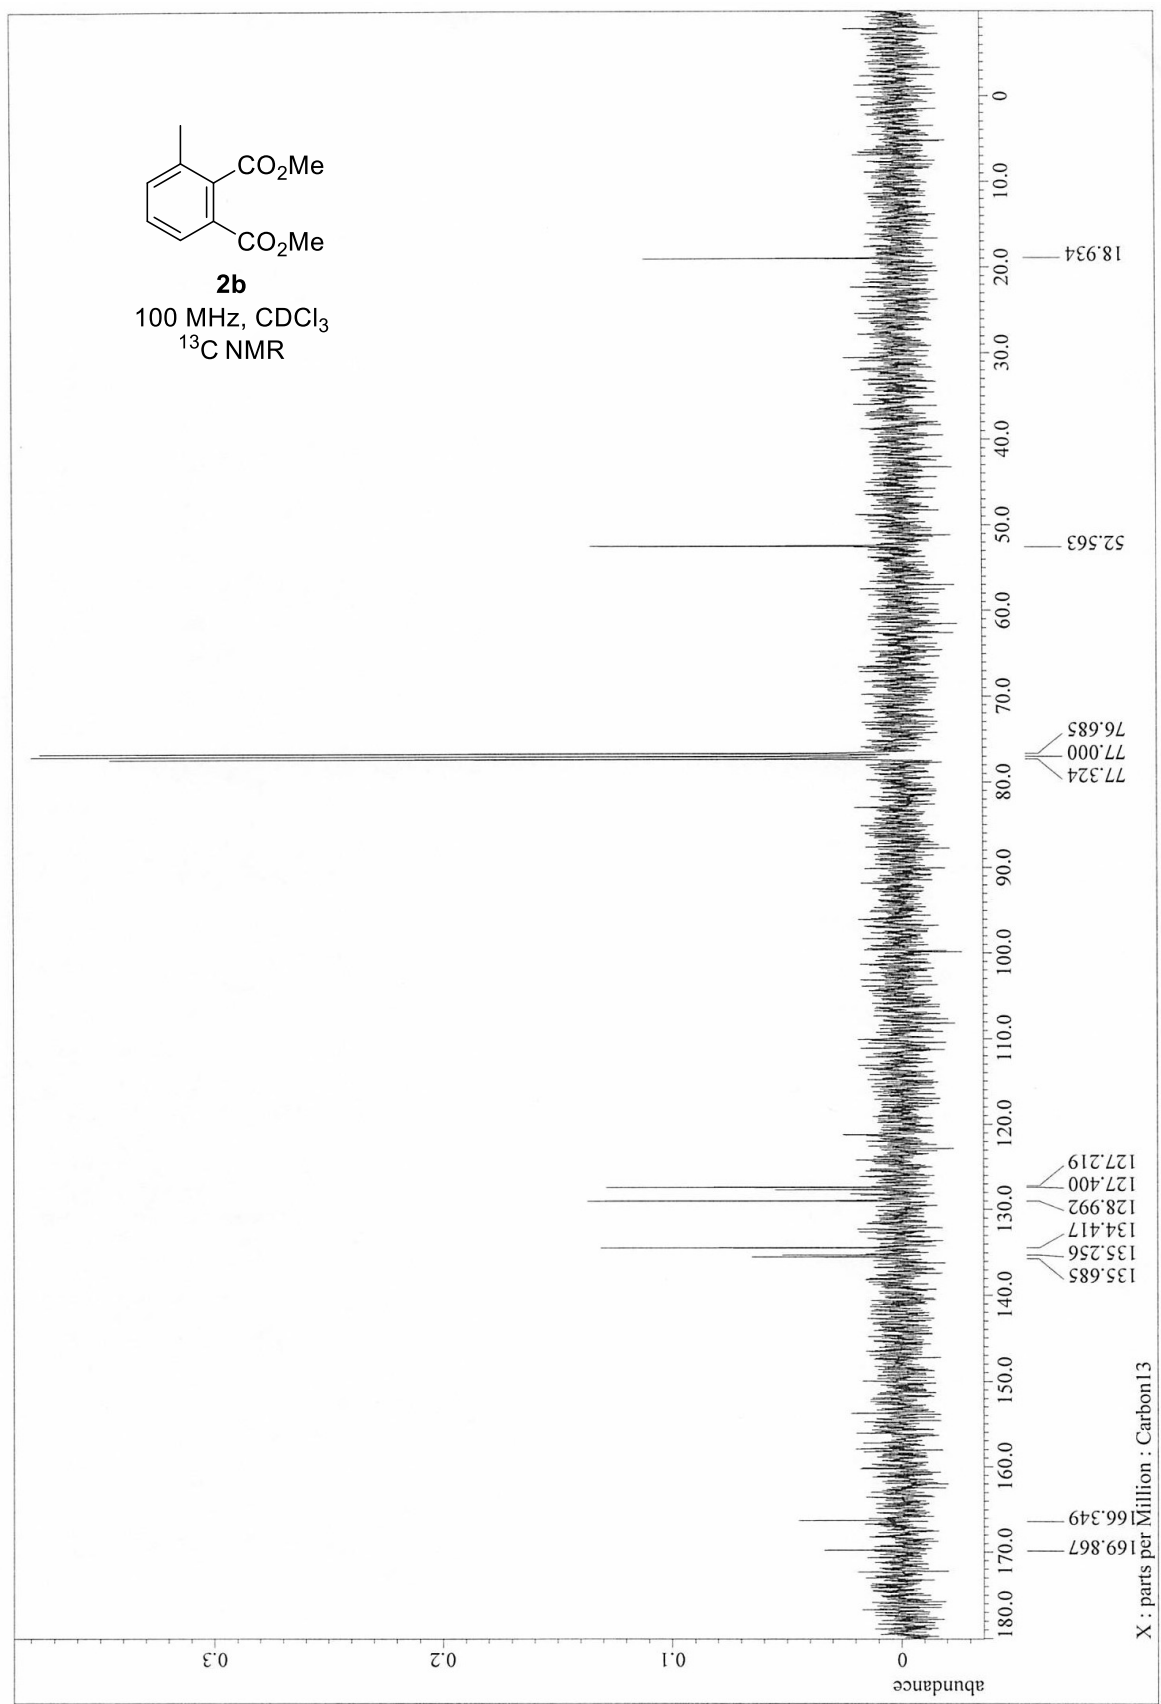

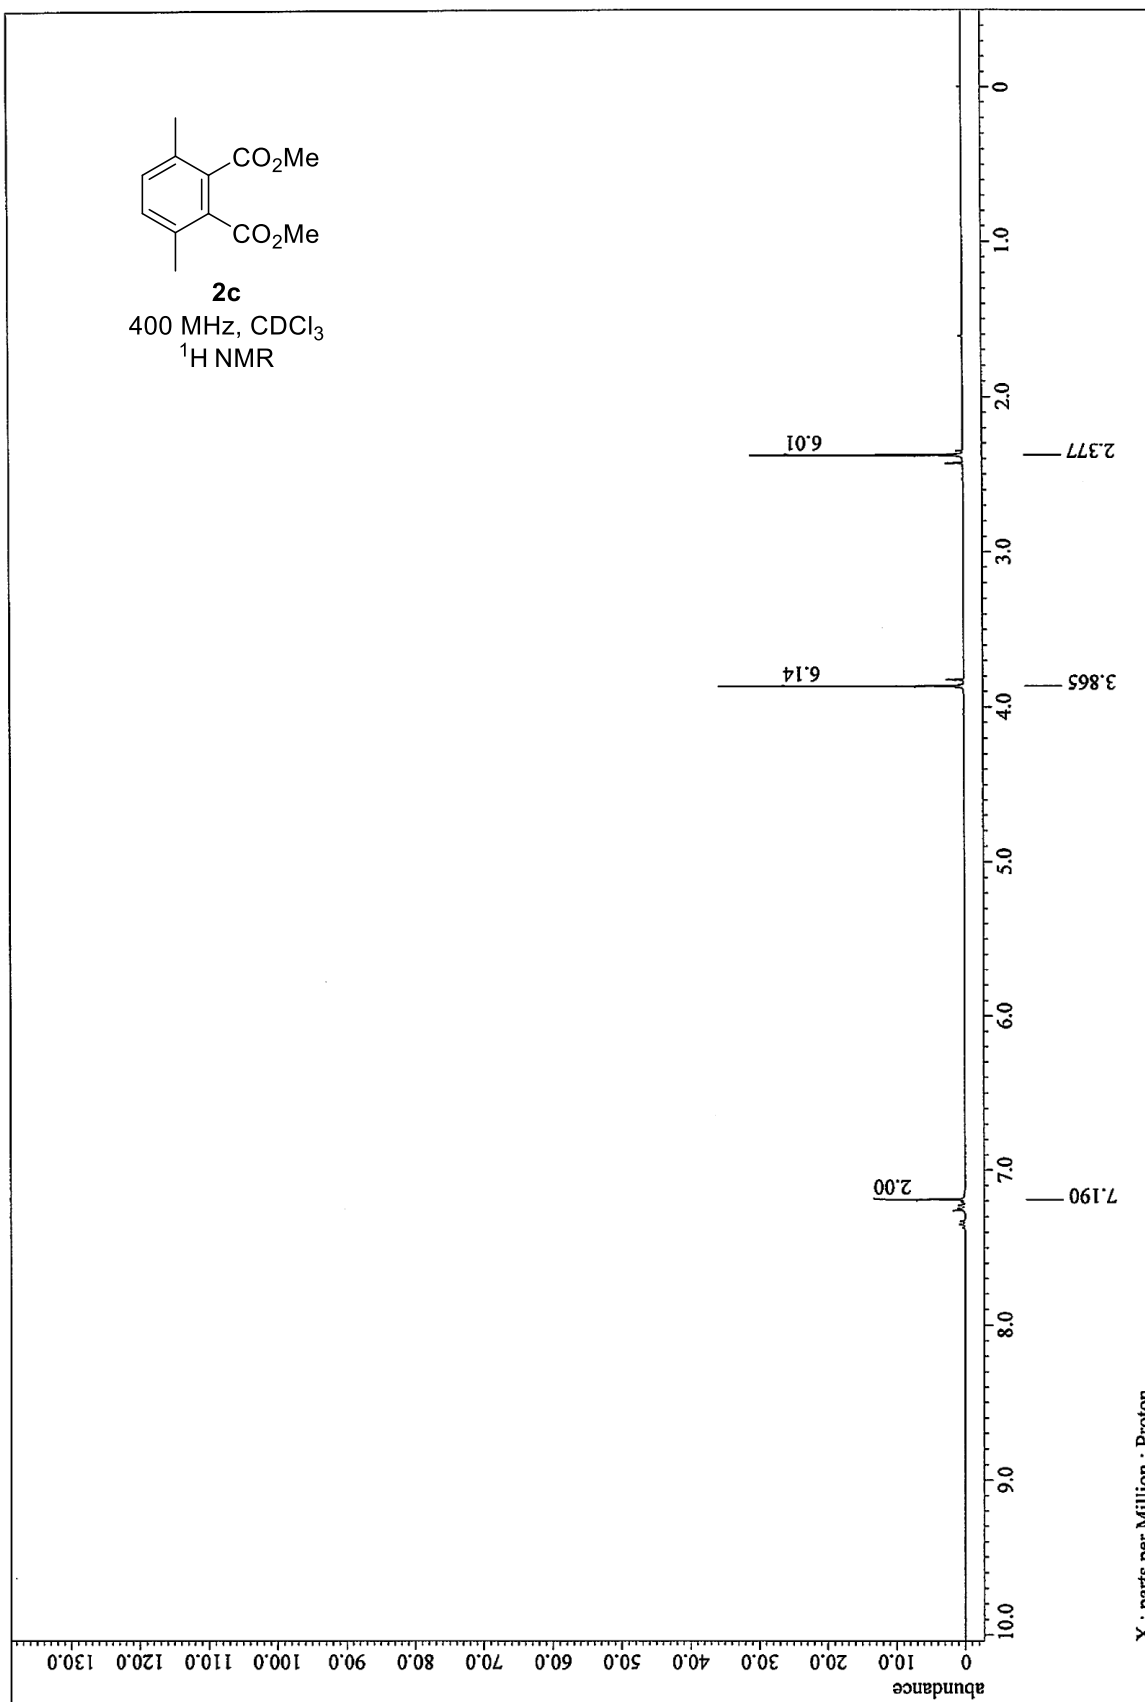

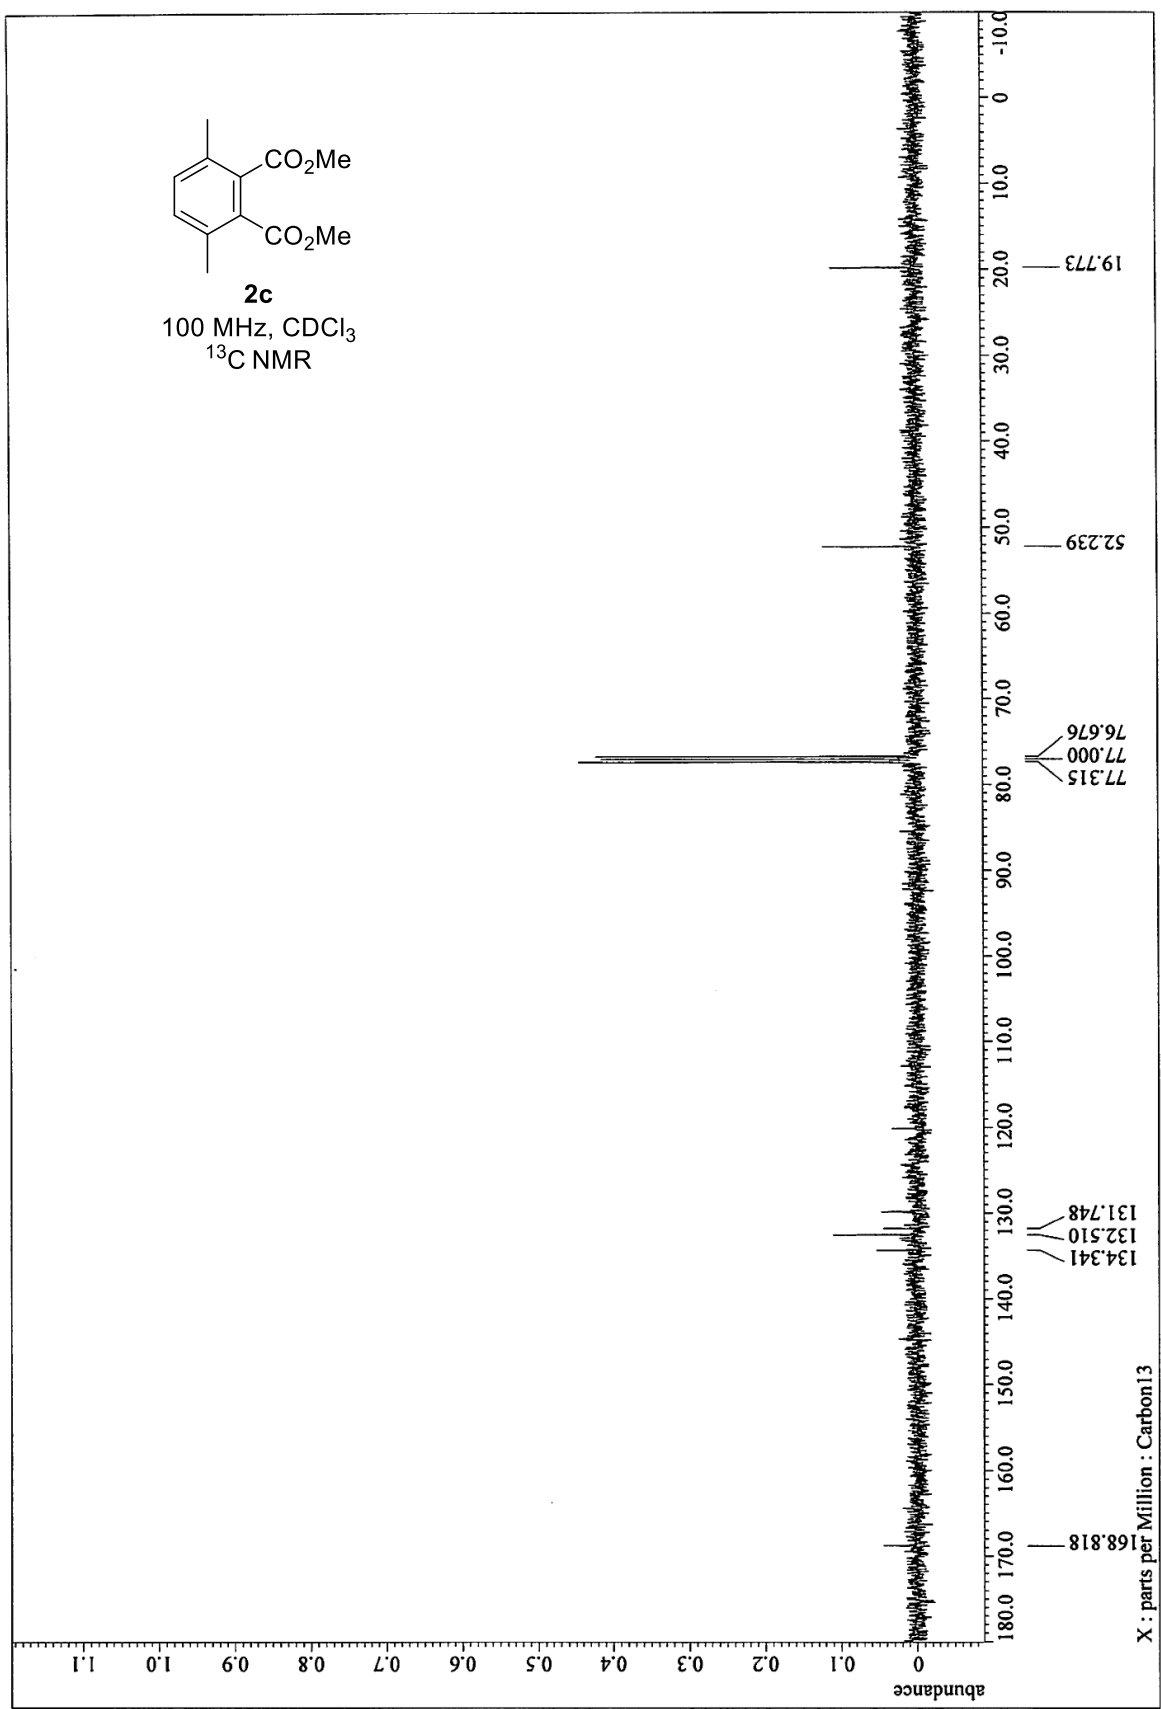

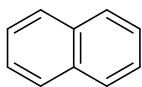

**2d**  
400 MHz, CDCl<sub>3</sub>  
<sup>1</sup>H NMR

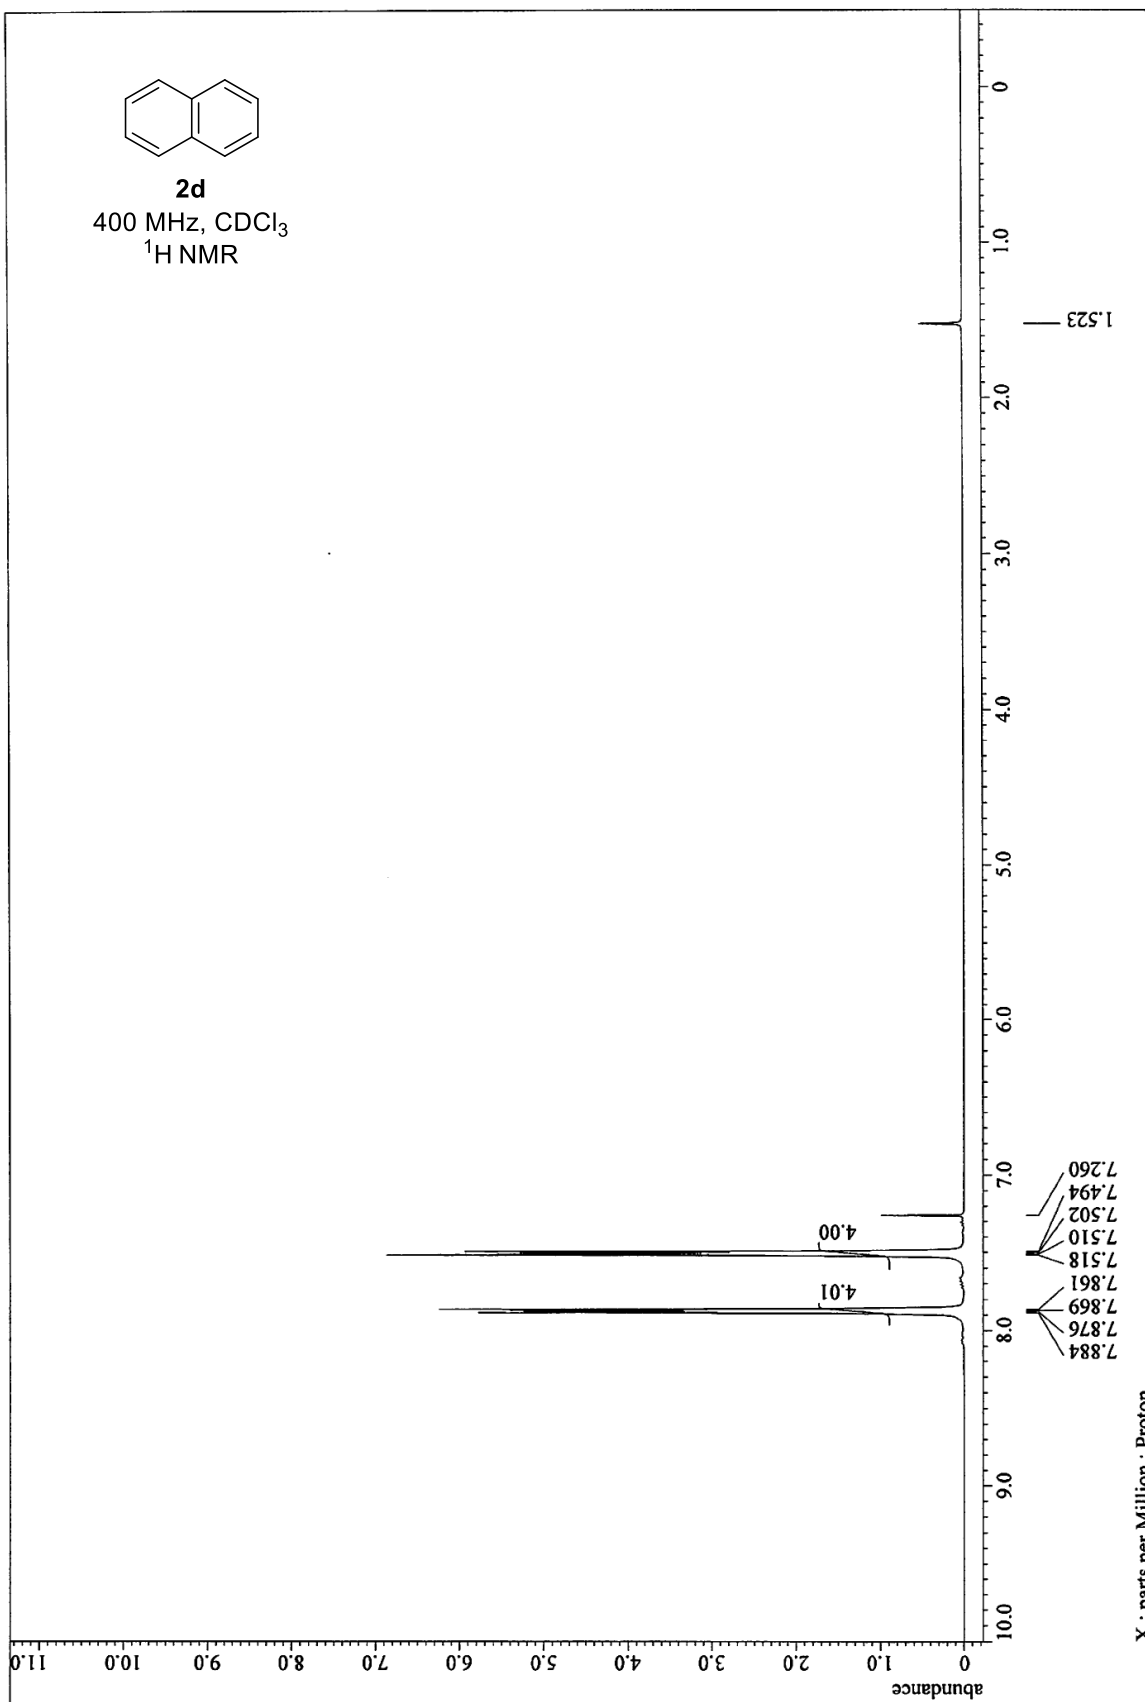



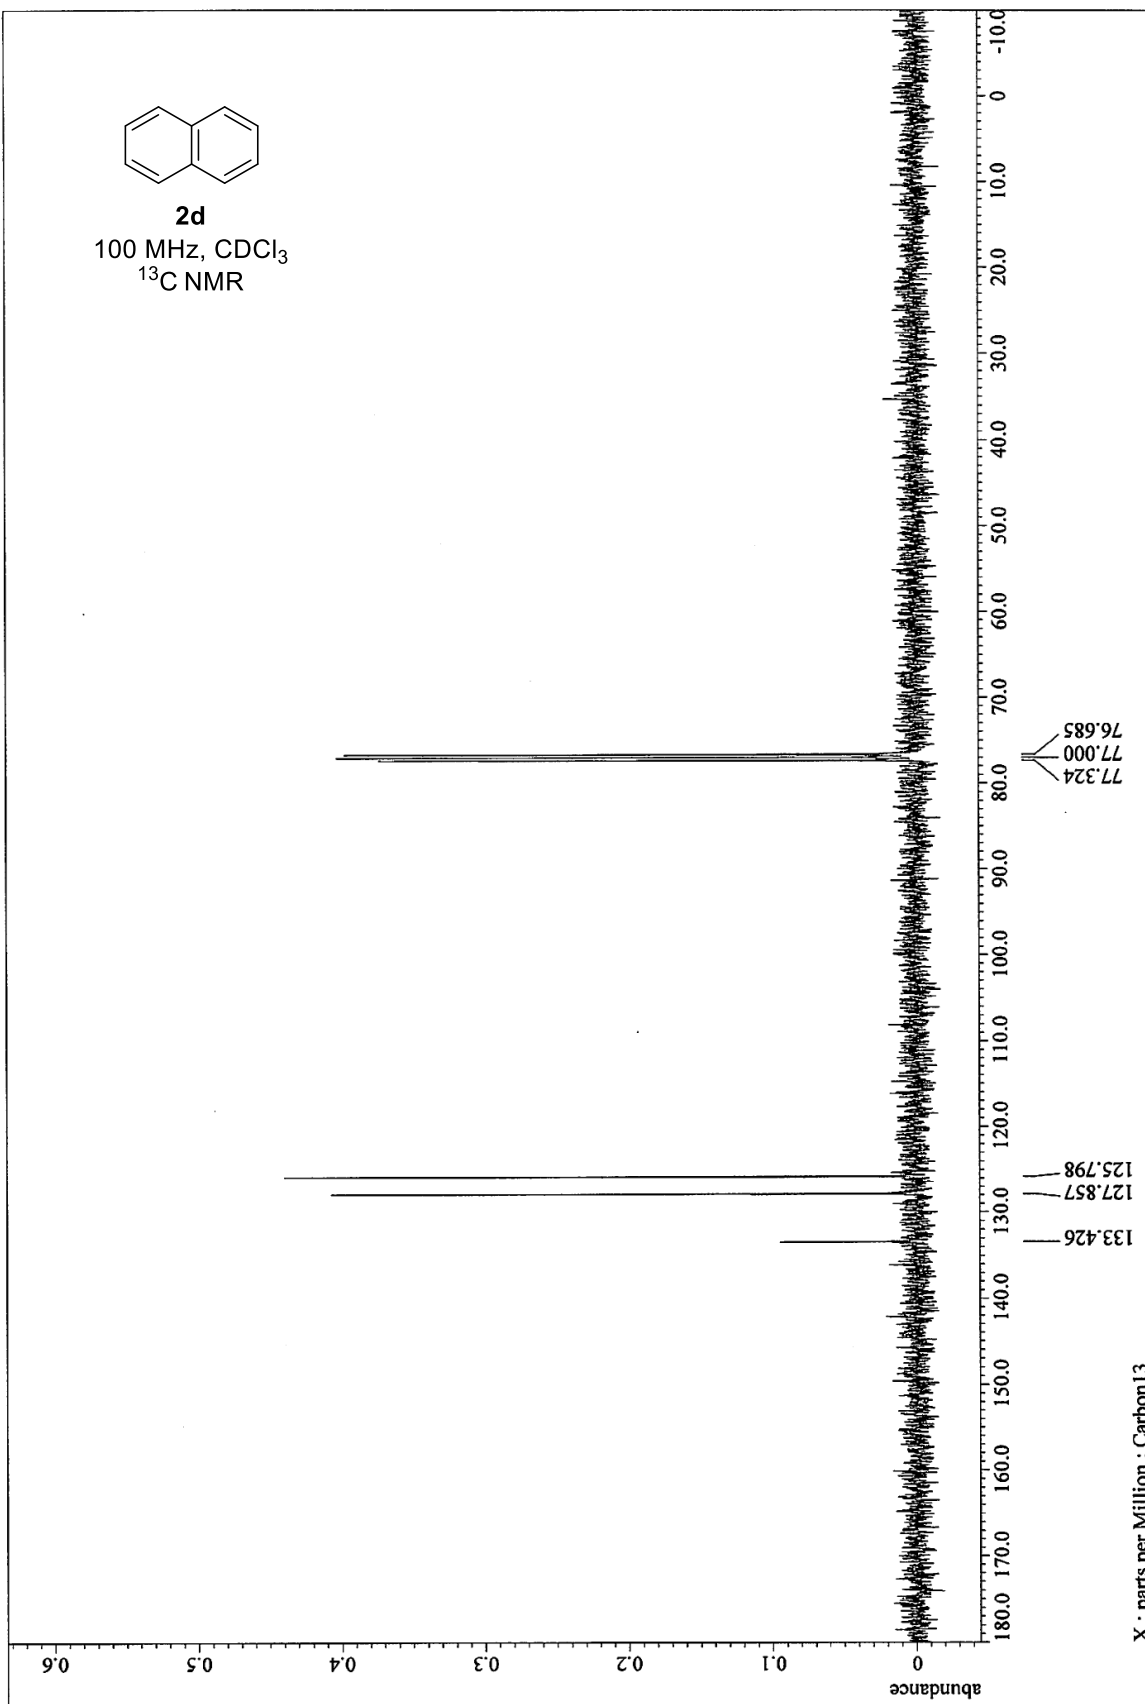

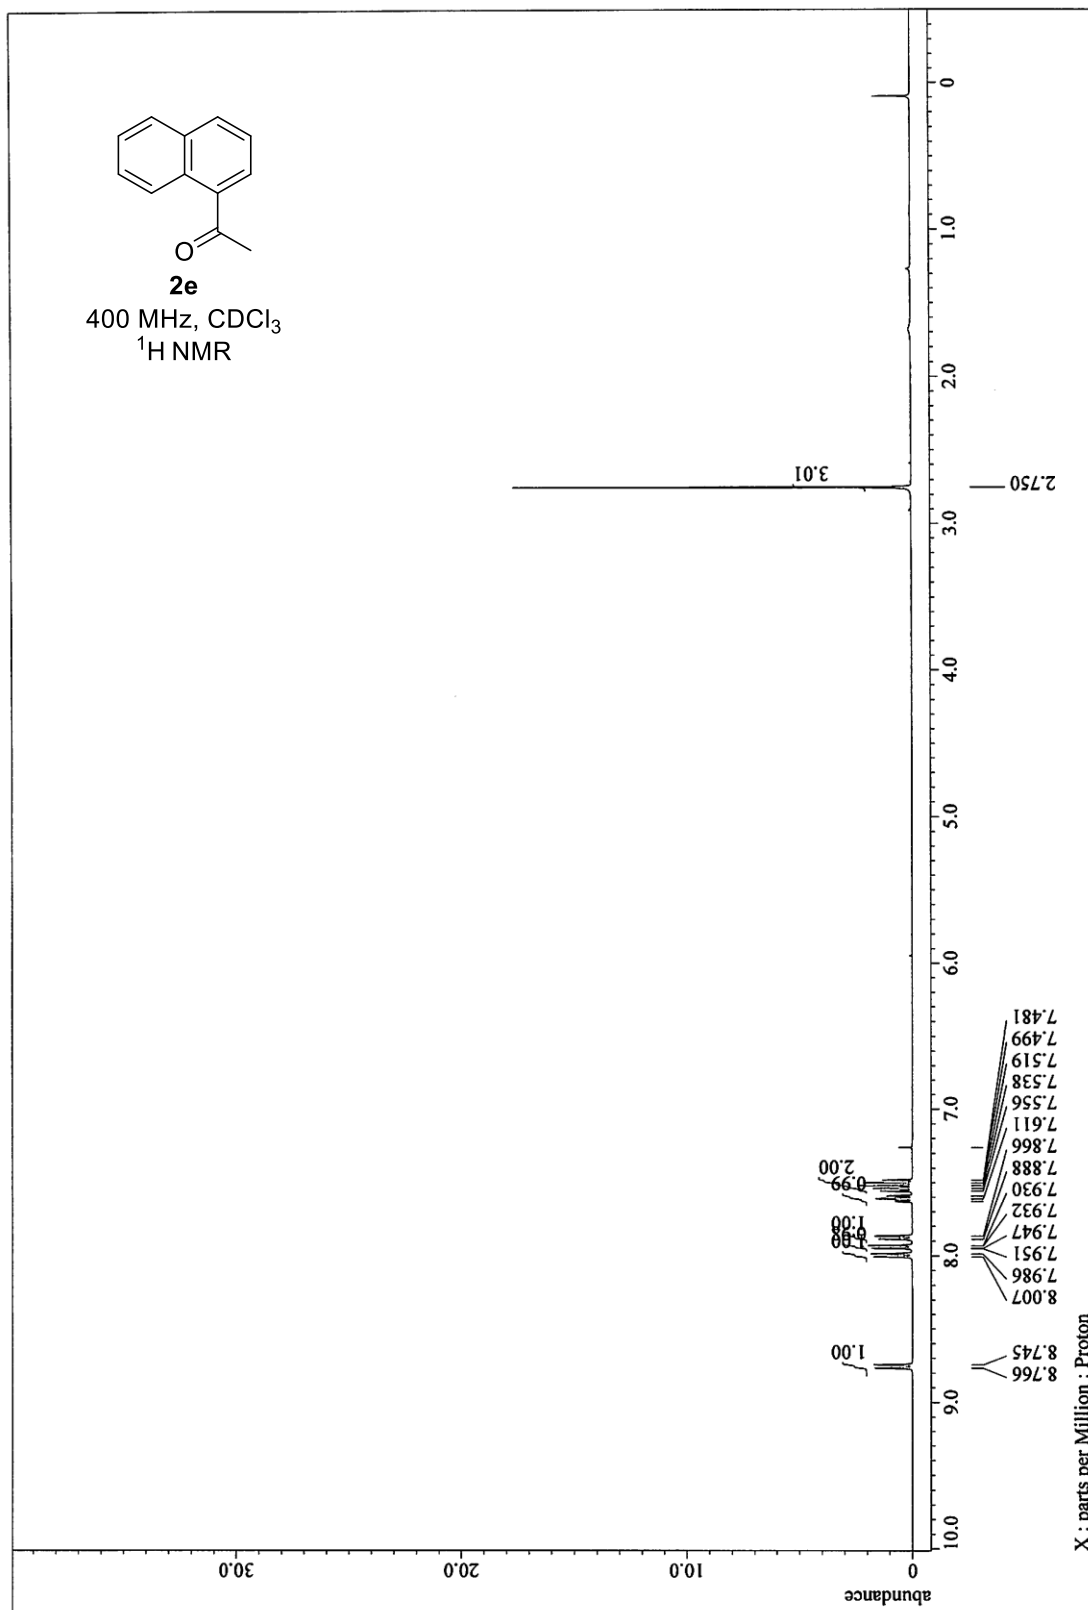

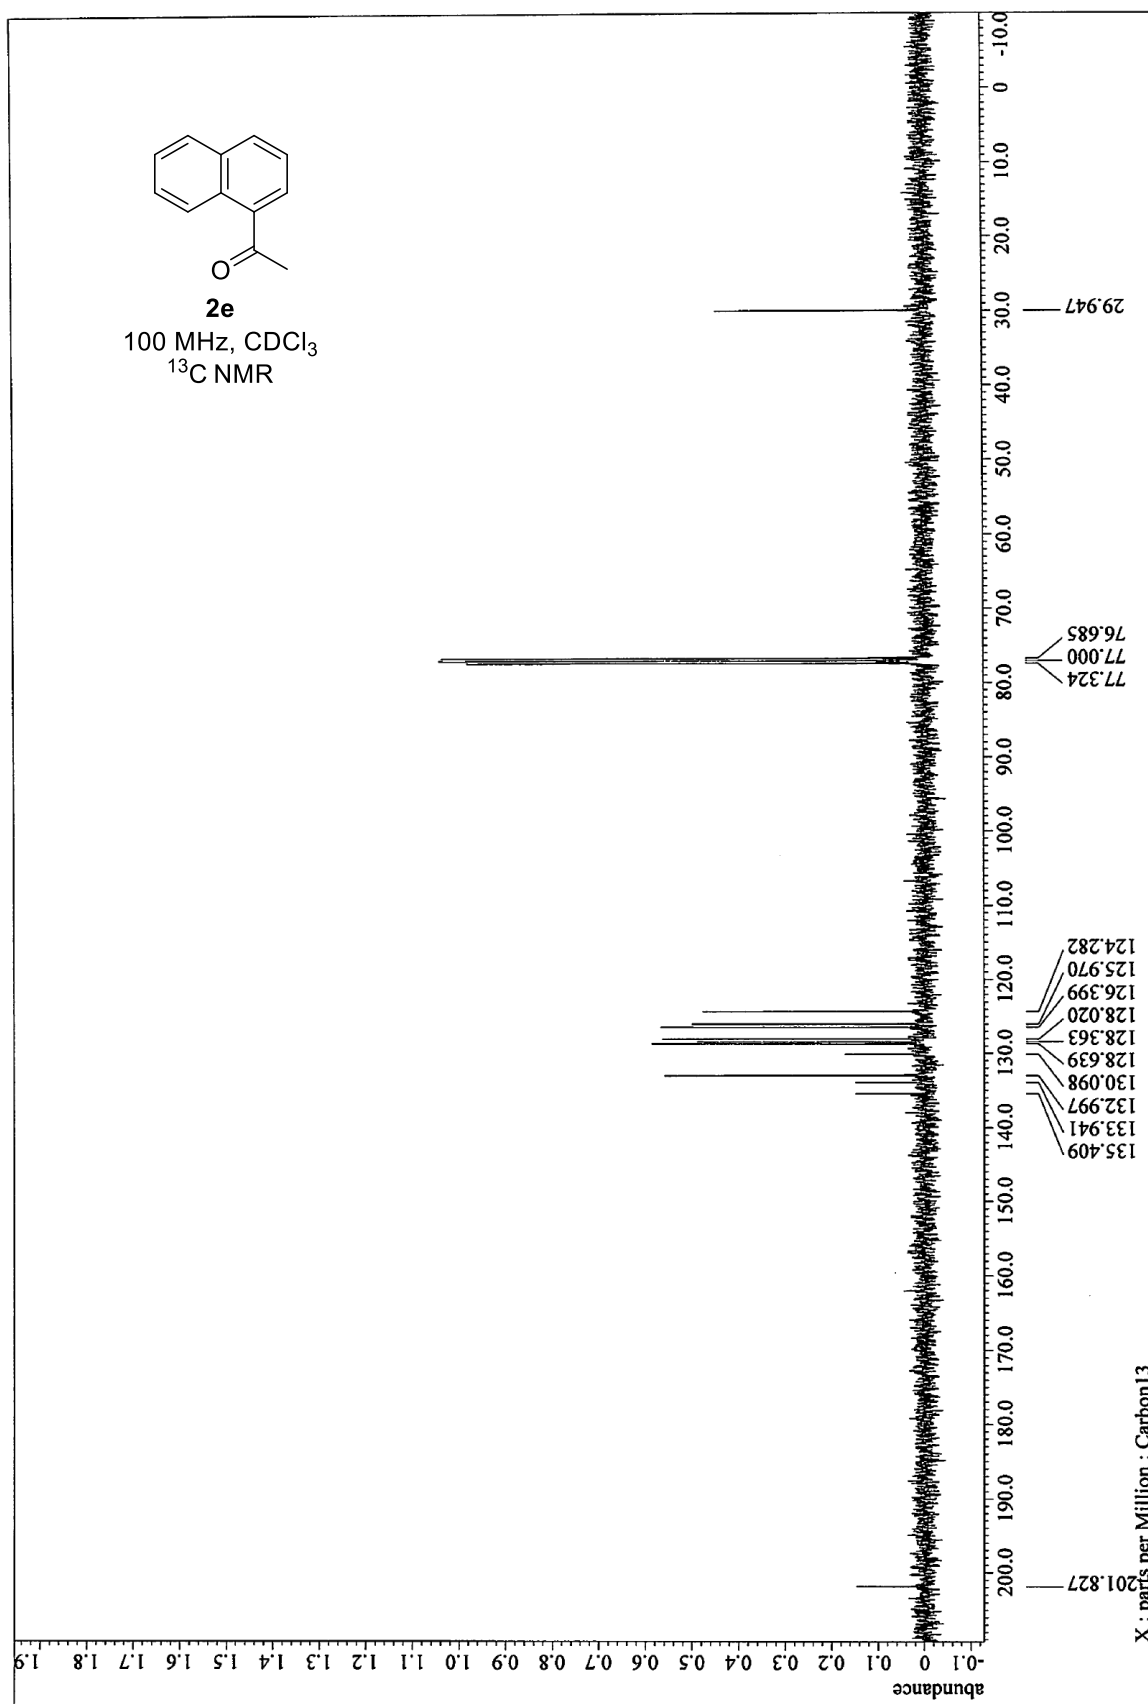



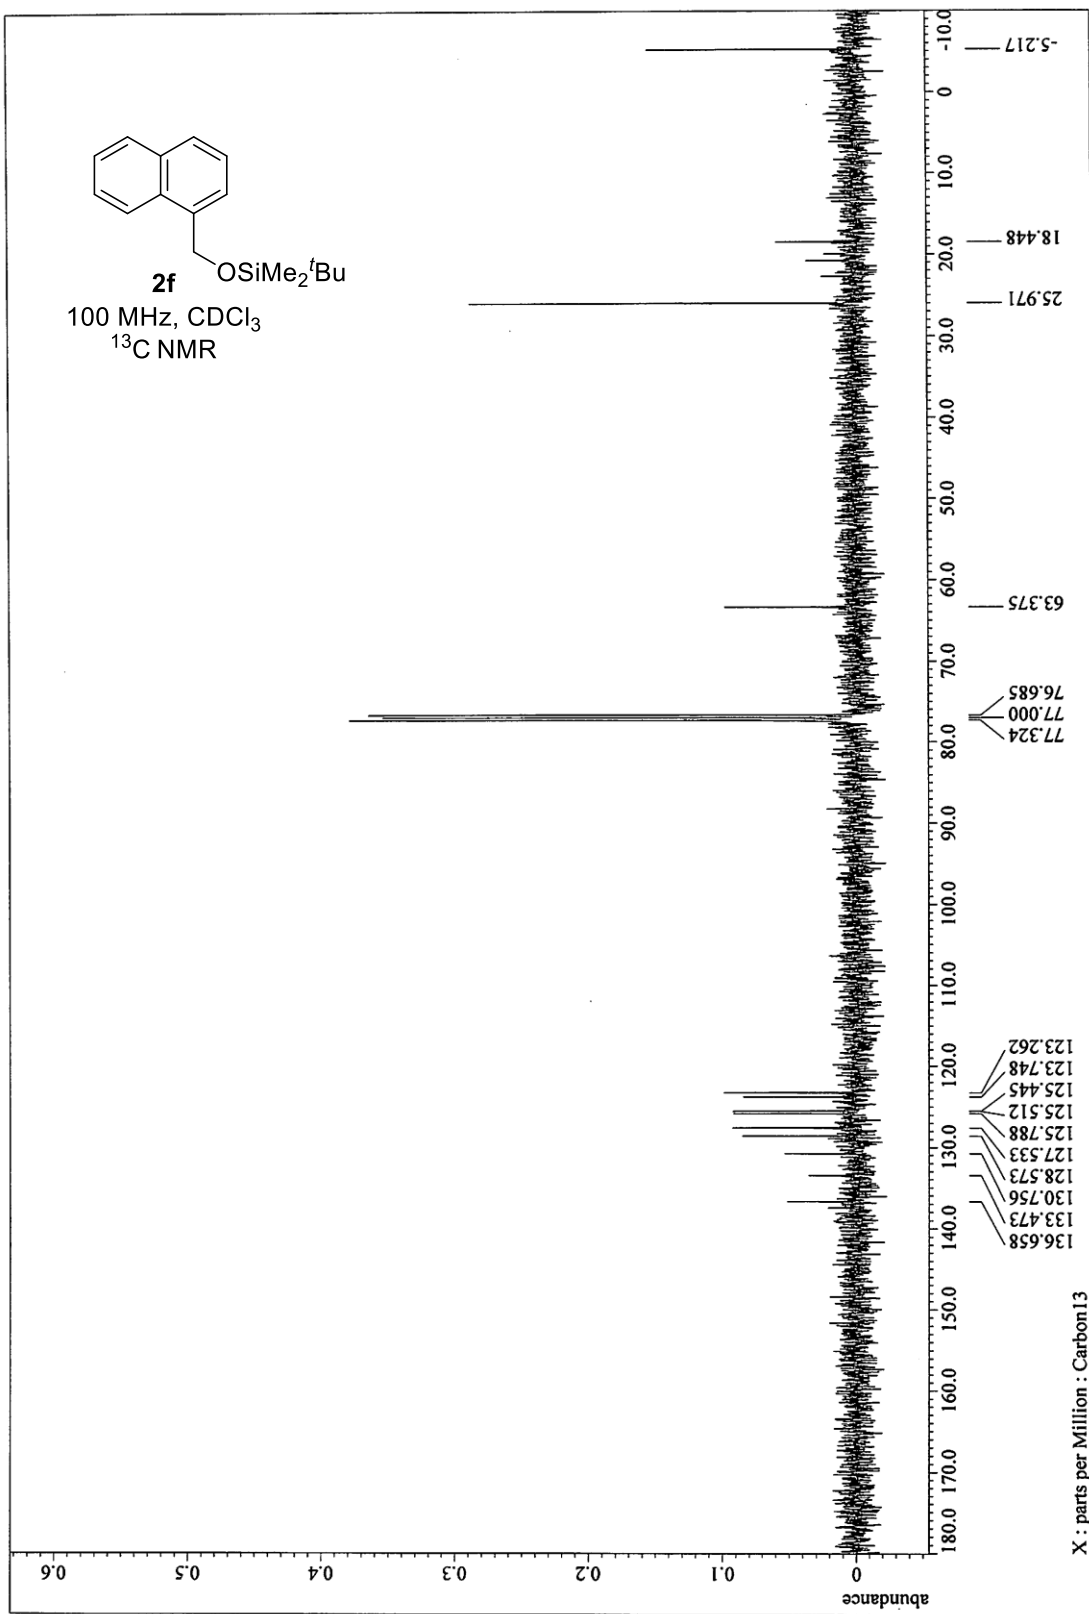

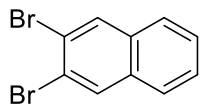

**2g**

400 MHz, CDCl<sub>3</sub>  
<sup>1</sup>H NMR

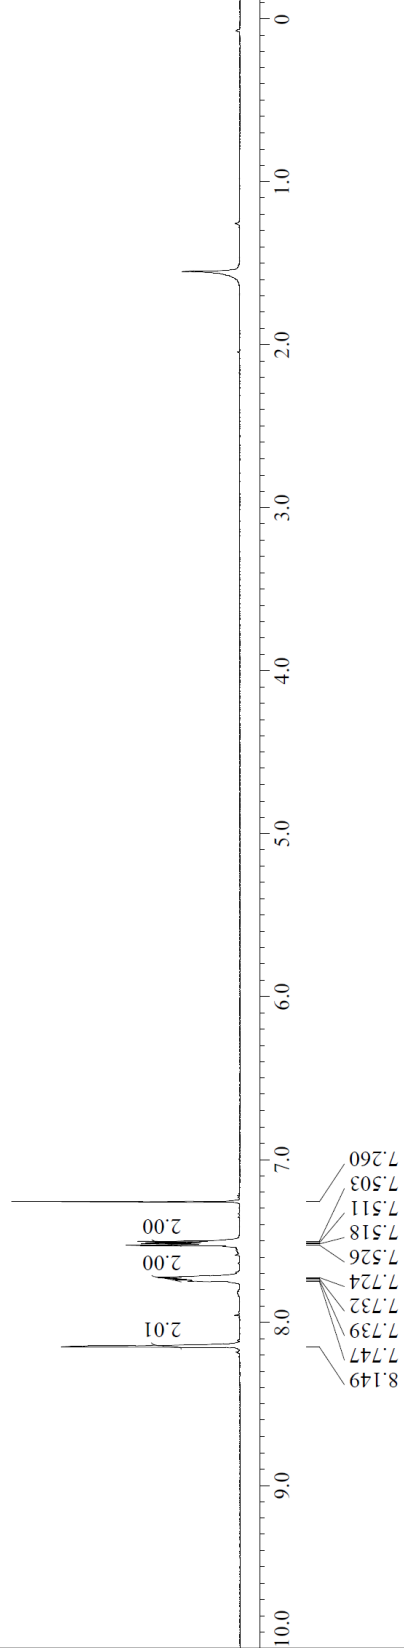

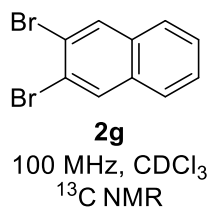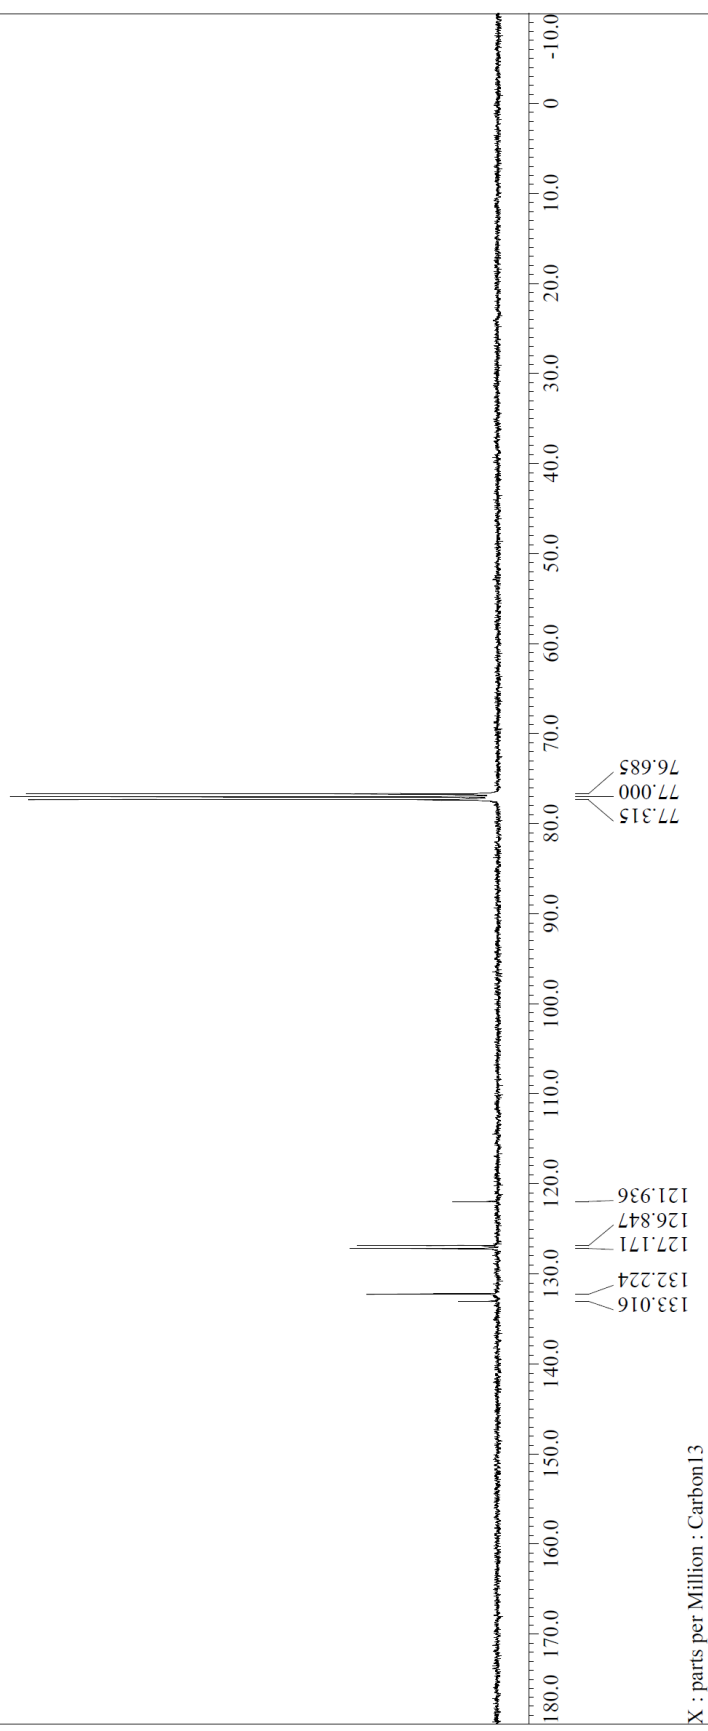

X : parts per Million : Carbon13

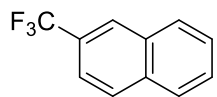

**2h**  
400 MHz, CDCl<sub>3</sub>  
<sup>1</sup>H NMR

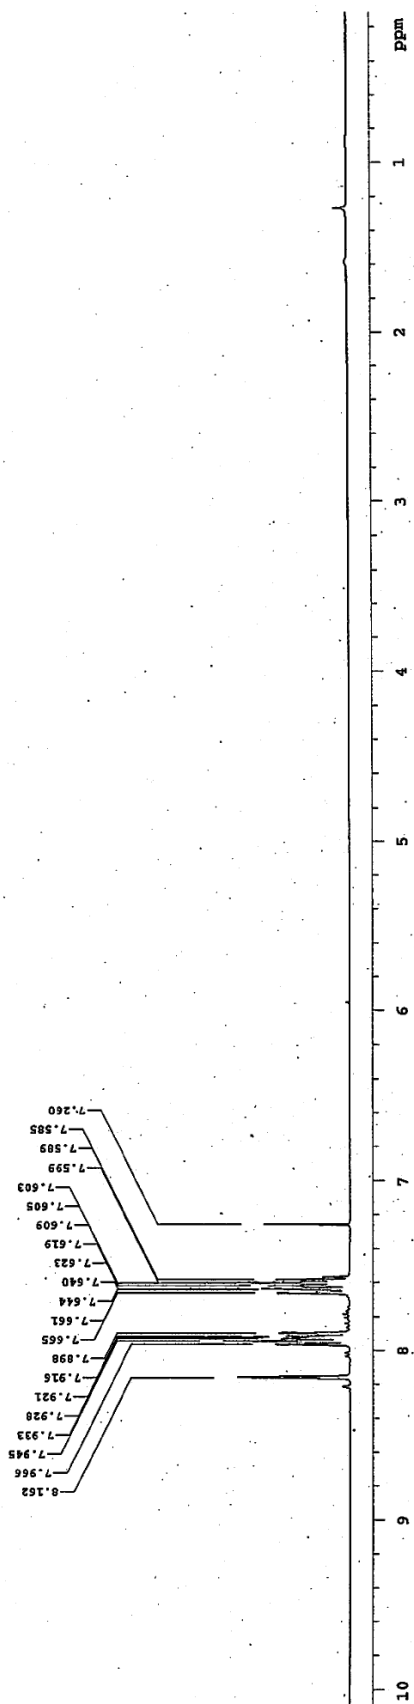



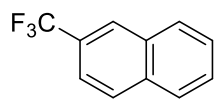

**2h**

100 MHz, CDCl<sub>3</sub>  
<sup>13</sup>C NMR

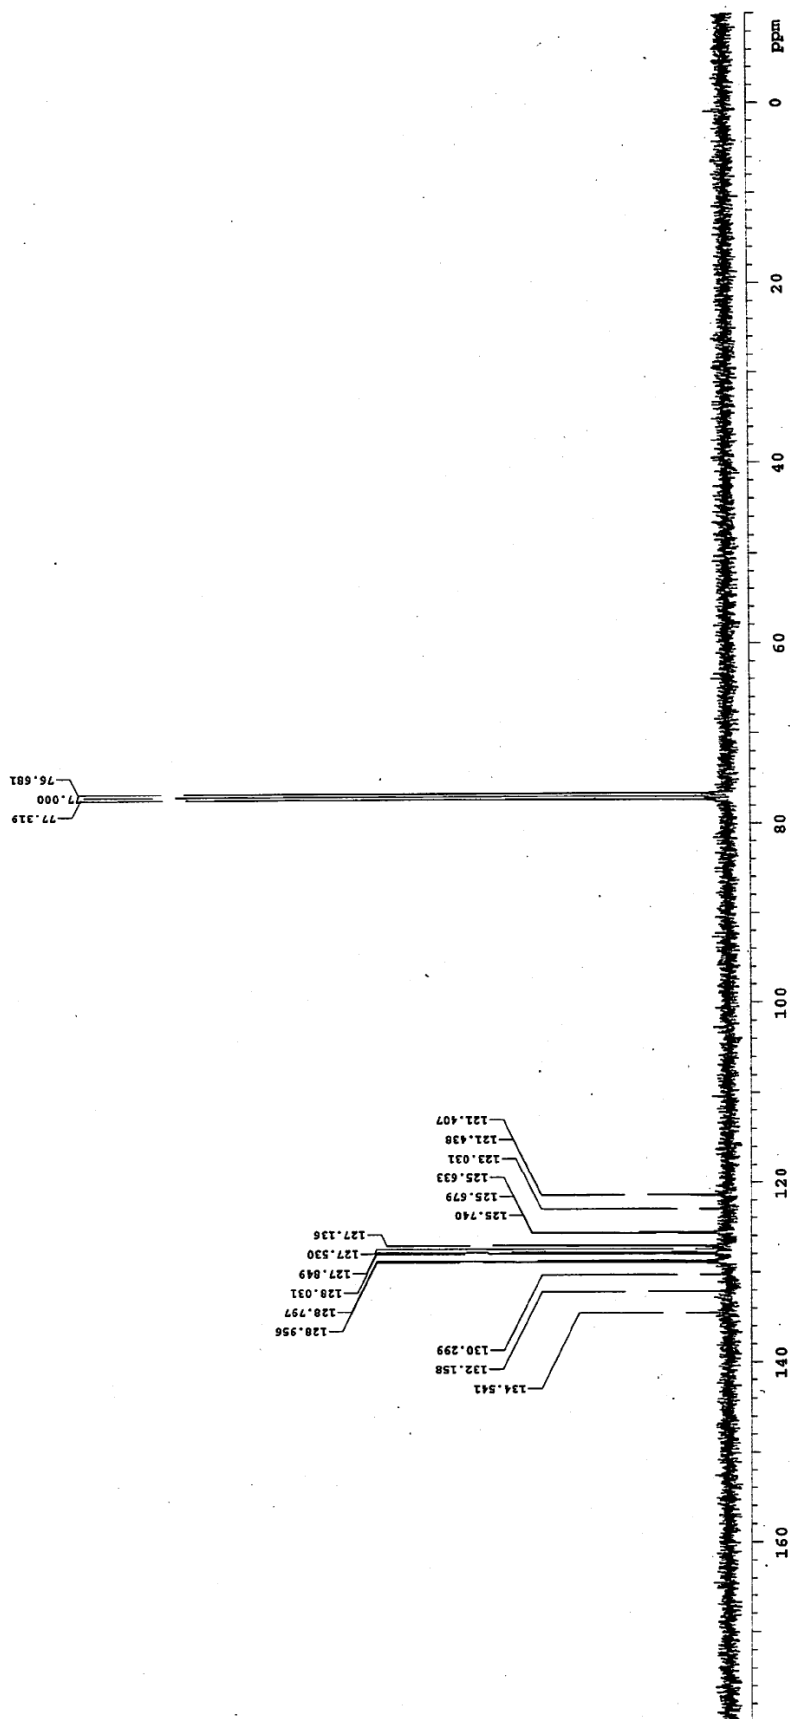

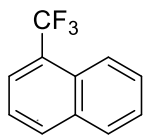

**2i**  
400 MHz, CDCl<sub>3</sub>  
<sup>1</sup>H NMR

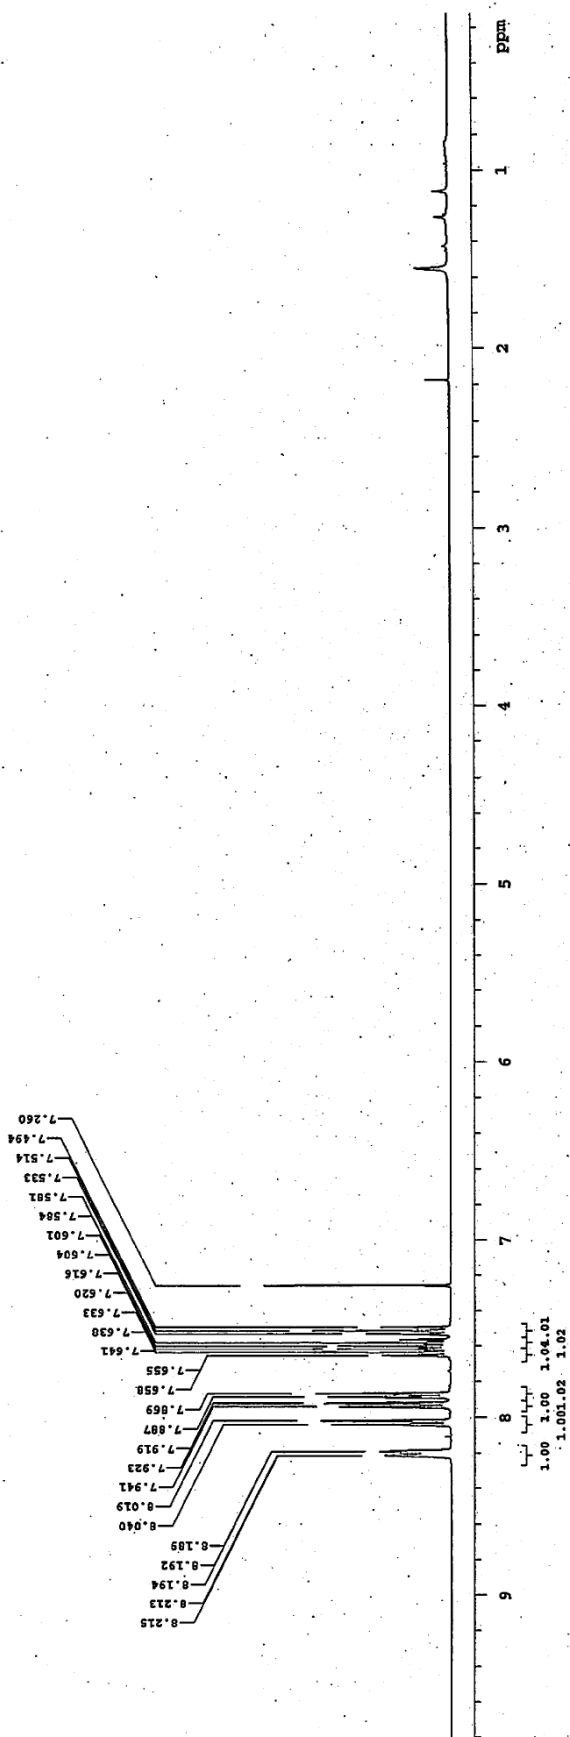

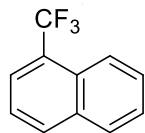

**2i**

100 MHz, CDCl<sub>3</sub>  
<sup>13</sup>C NMR

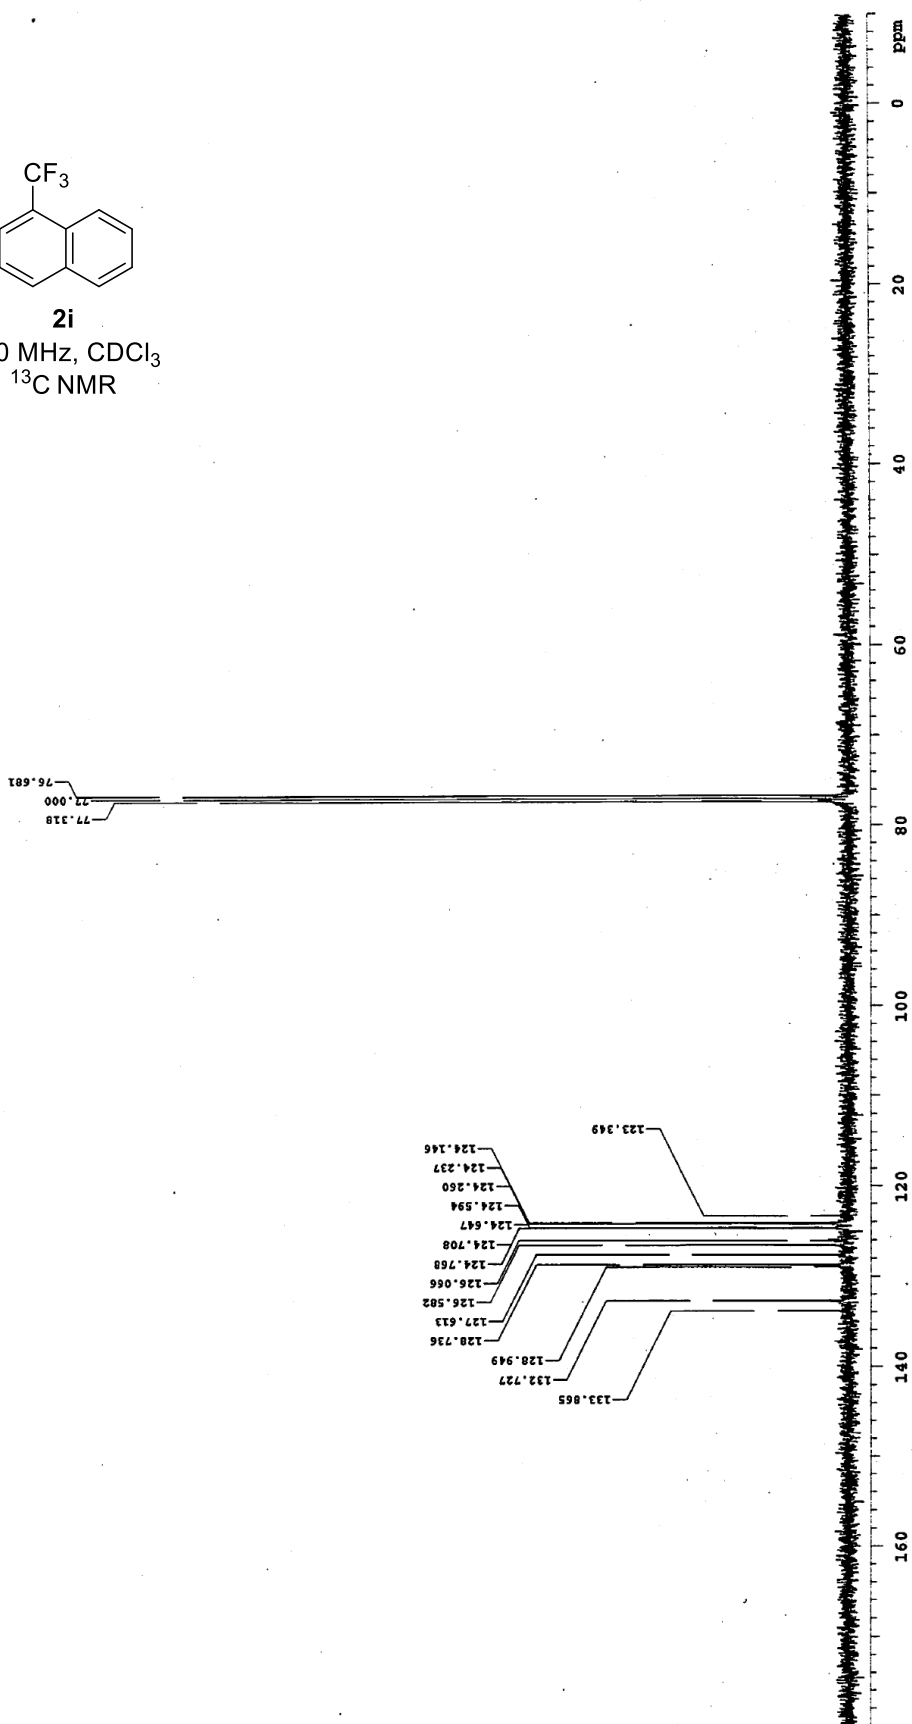

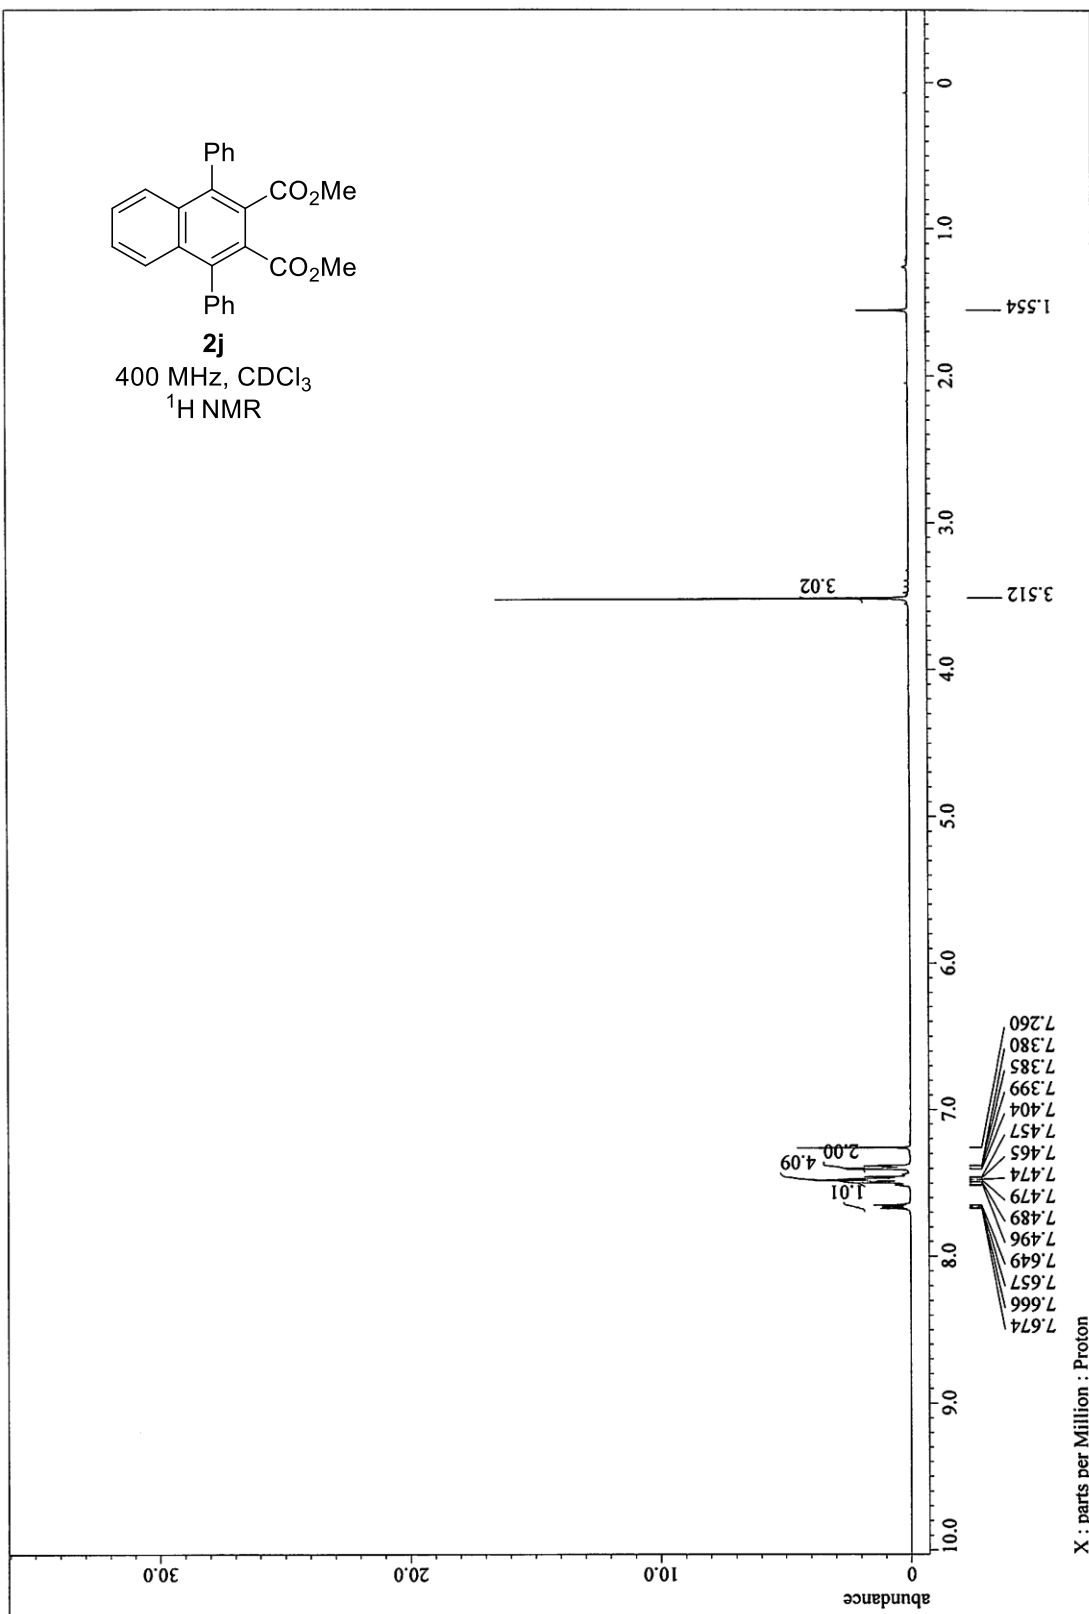

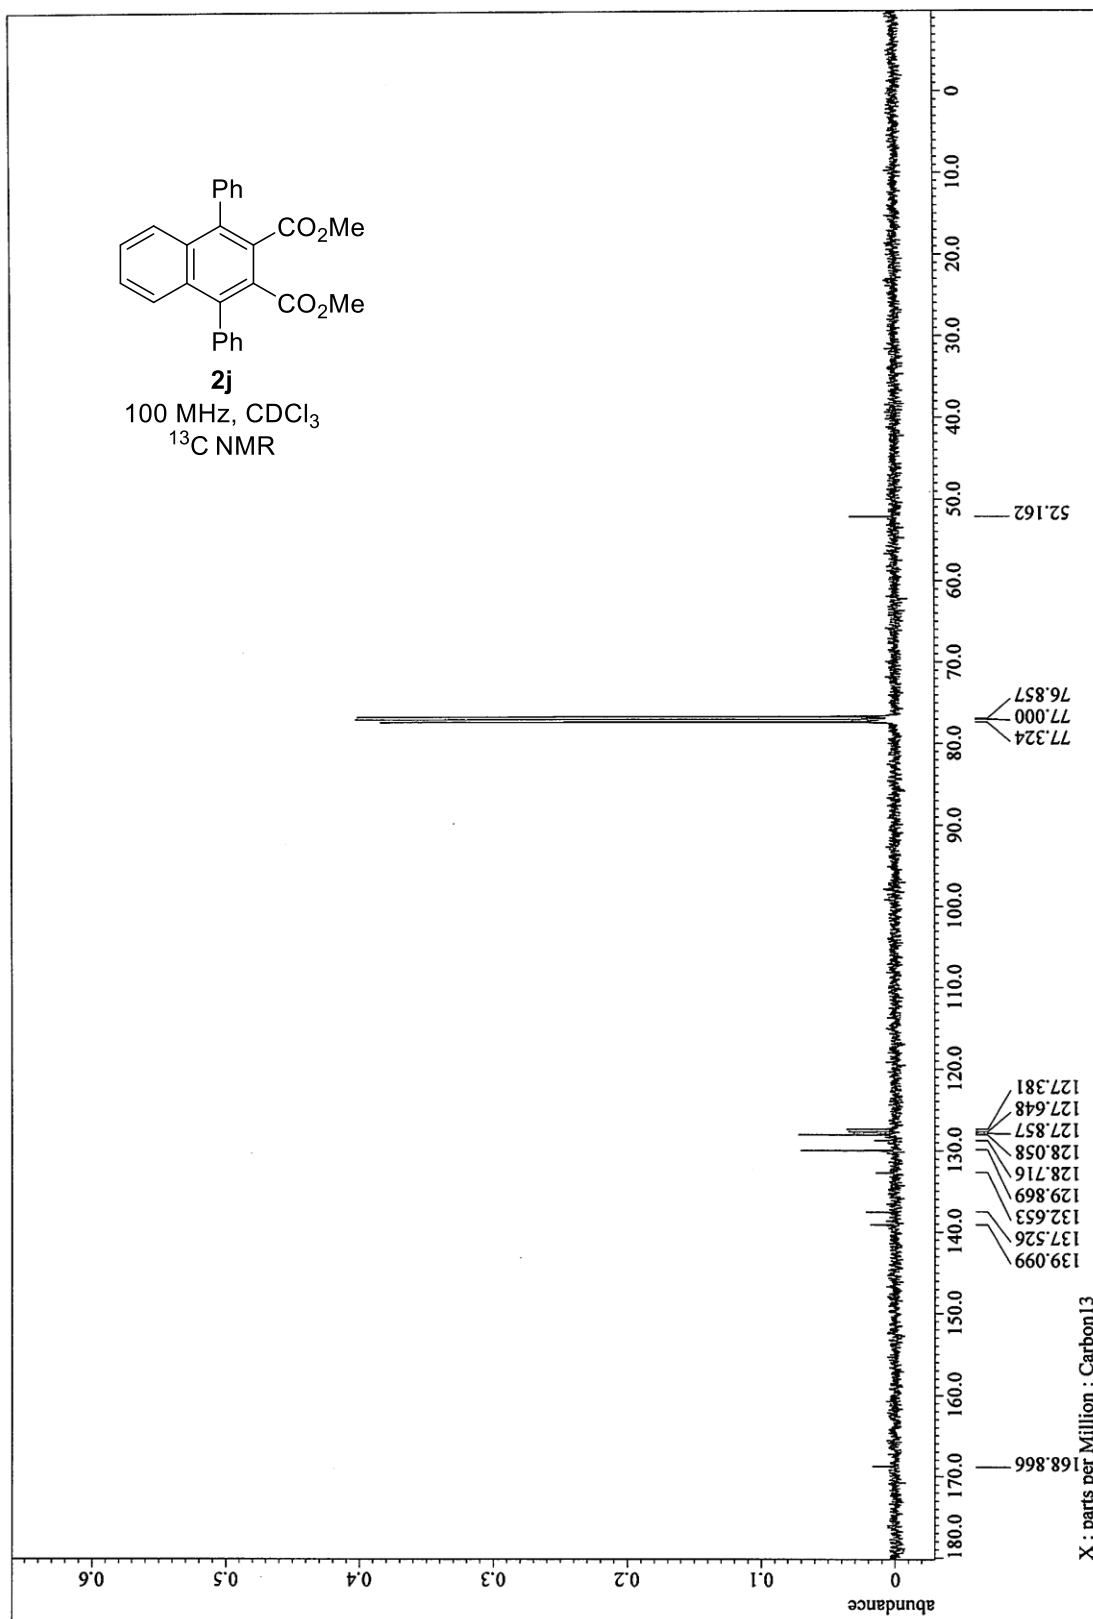

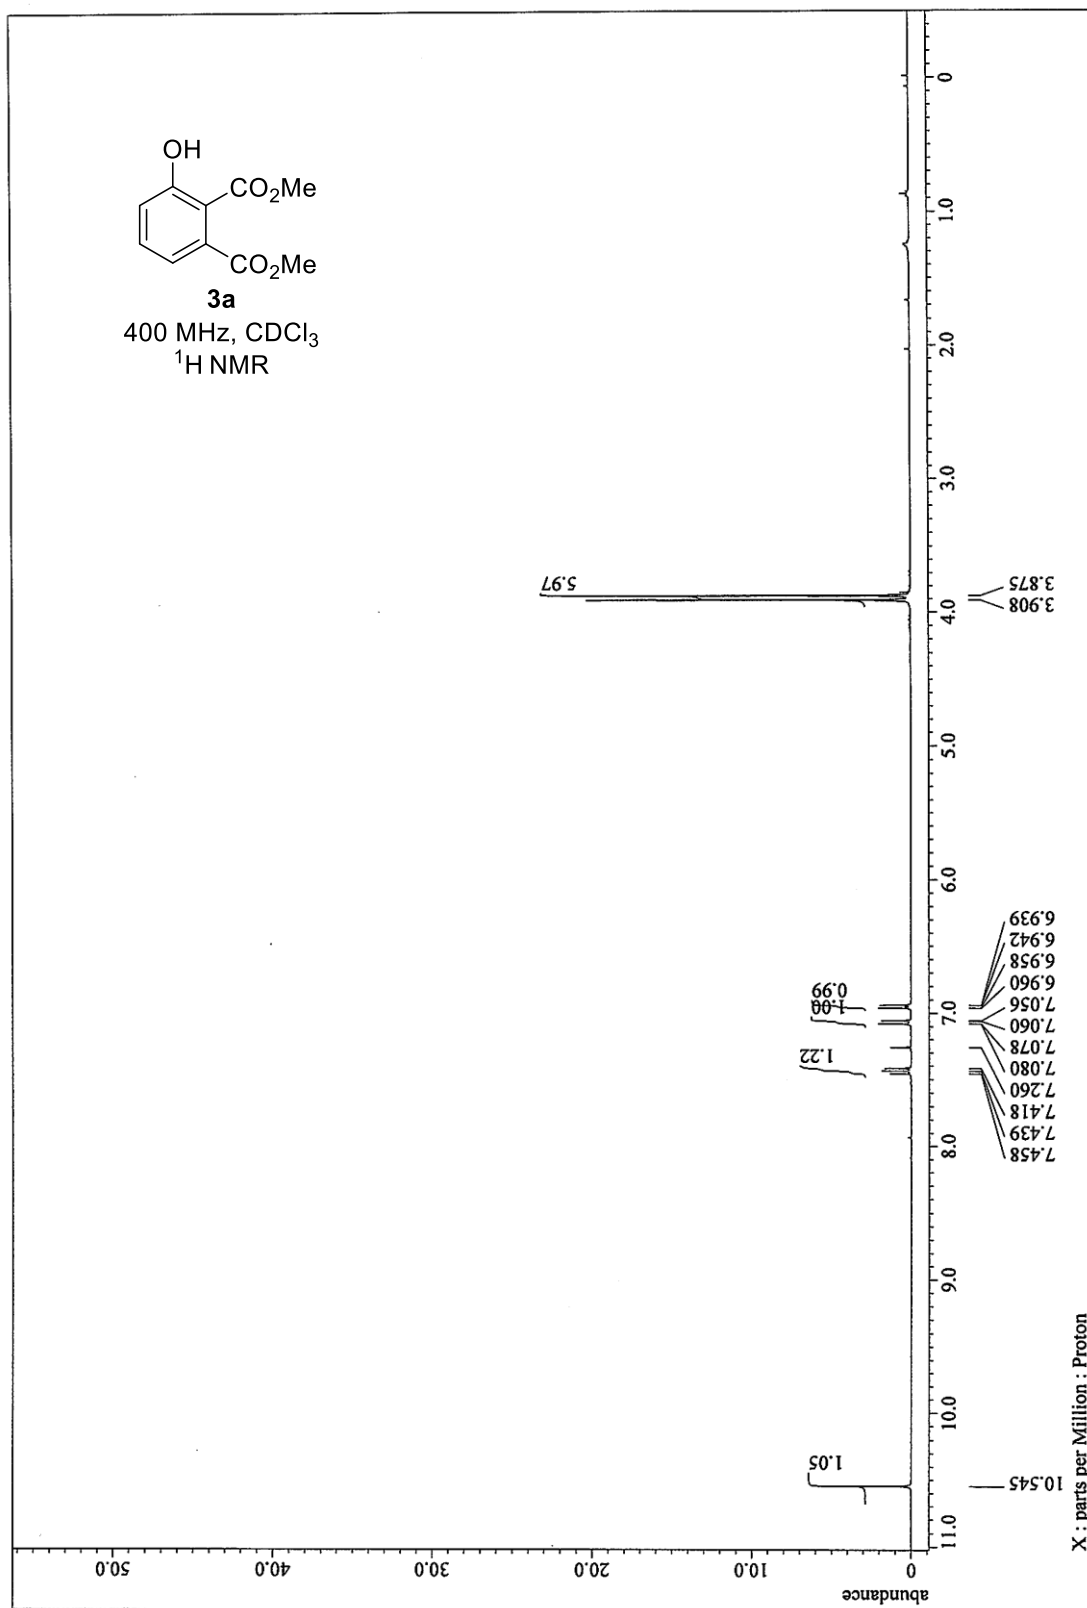

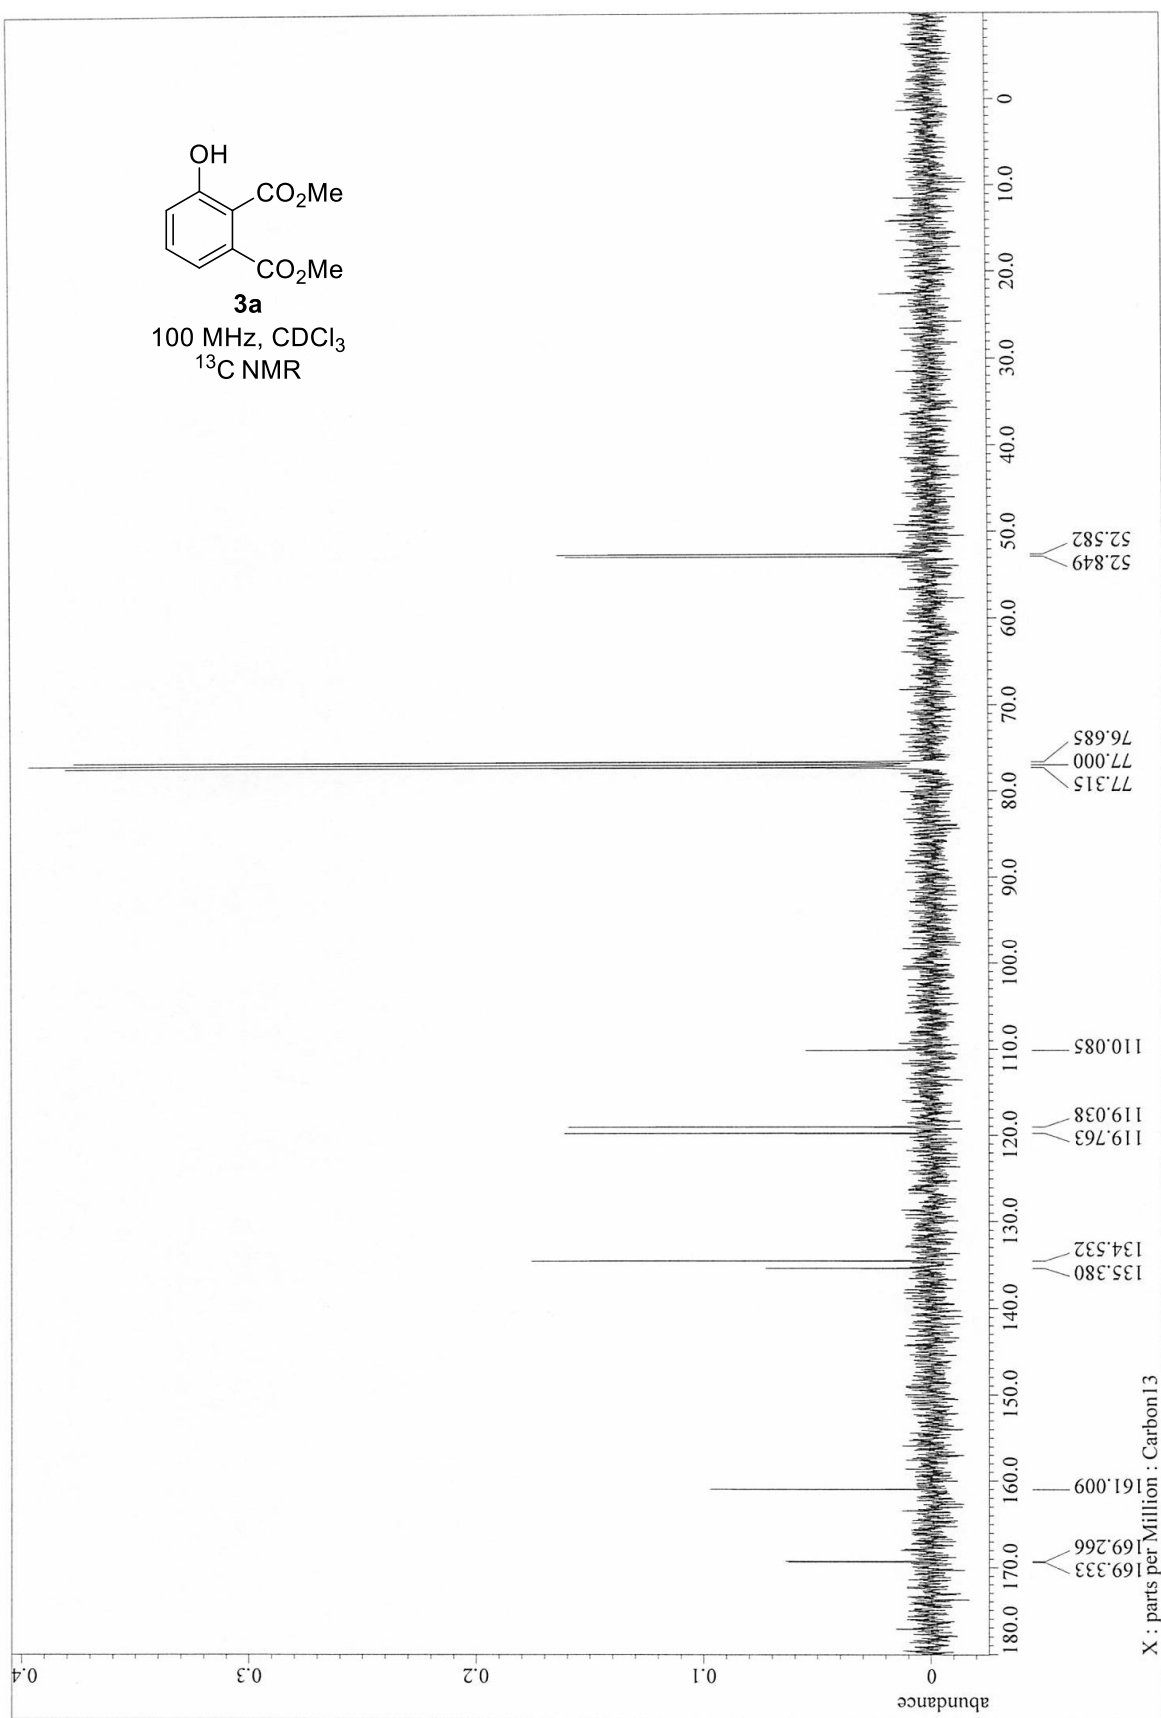

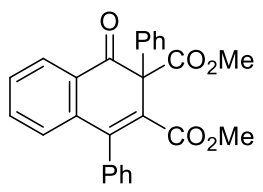

**3j**  
400 MHz, CDCl<sub>3</sub>  
<sup>1</sup>H NMR

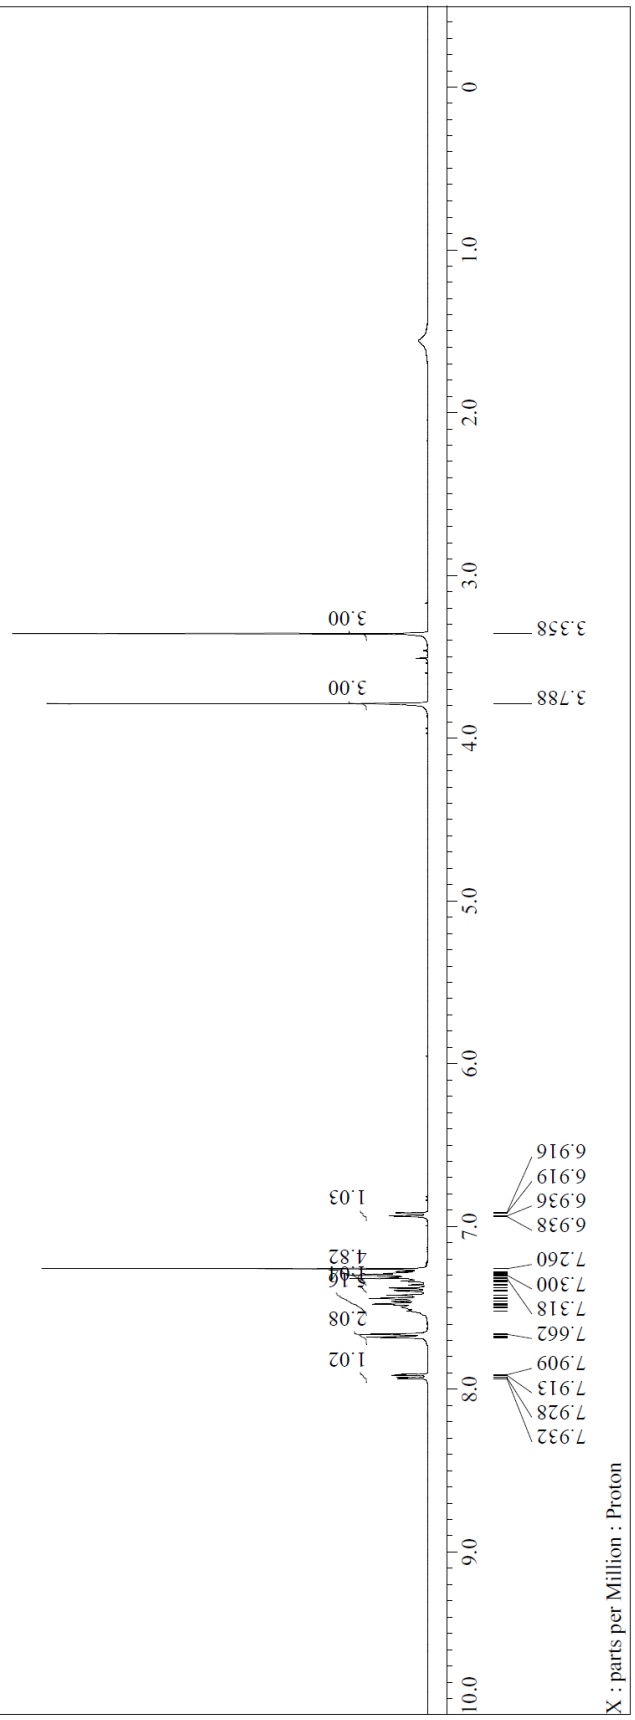



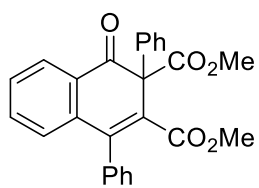

**3j**

100 MHz, CDCl<sub>3</sub>  
<sup>13</sup>C NMR

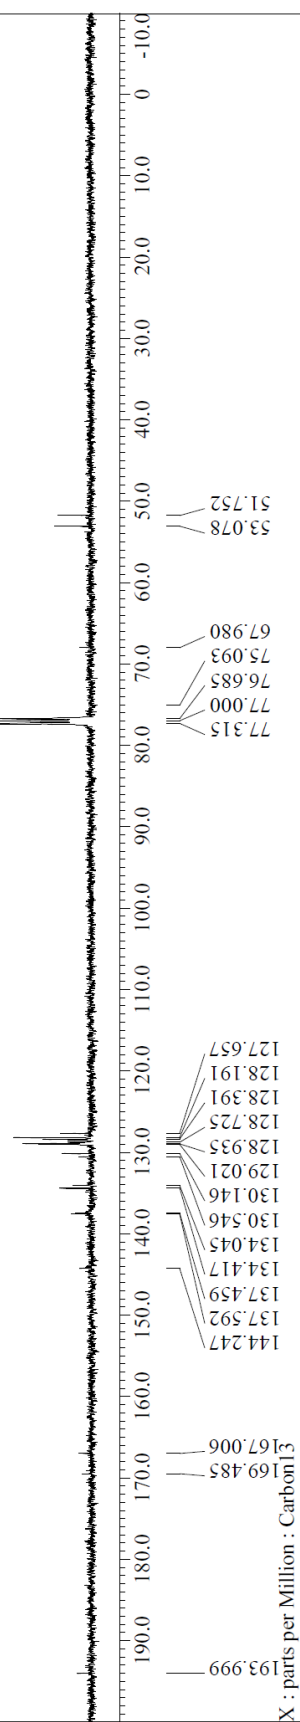

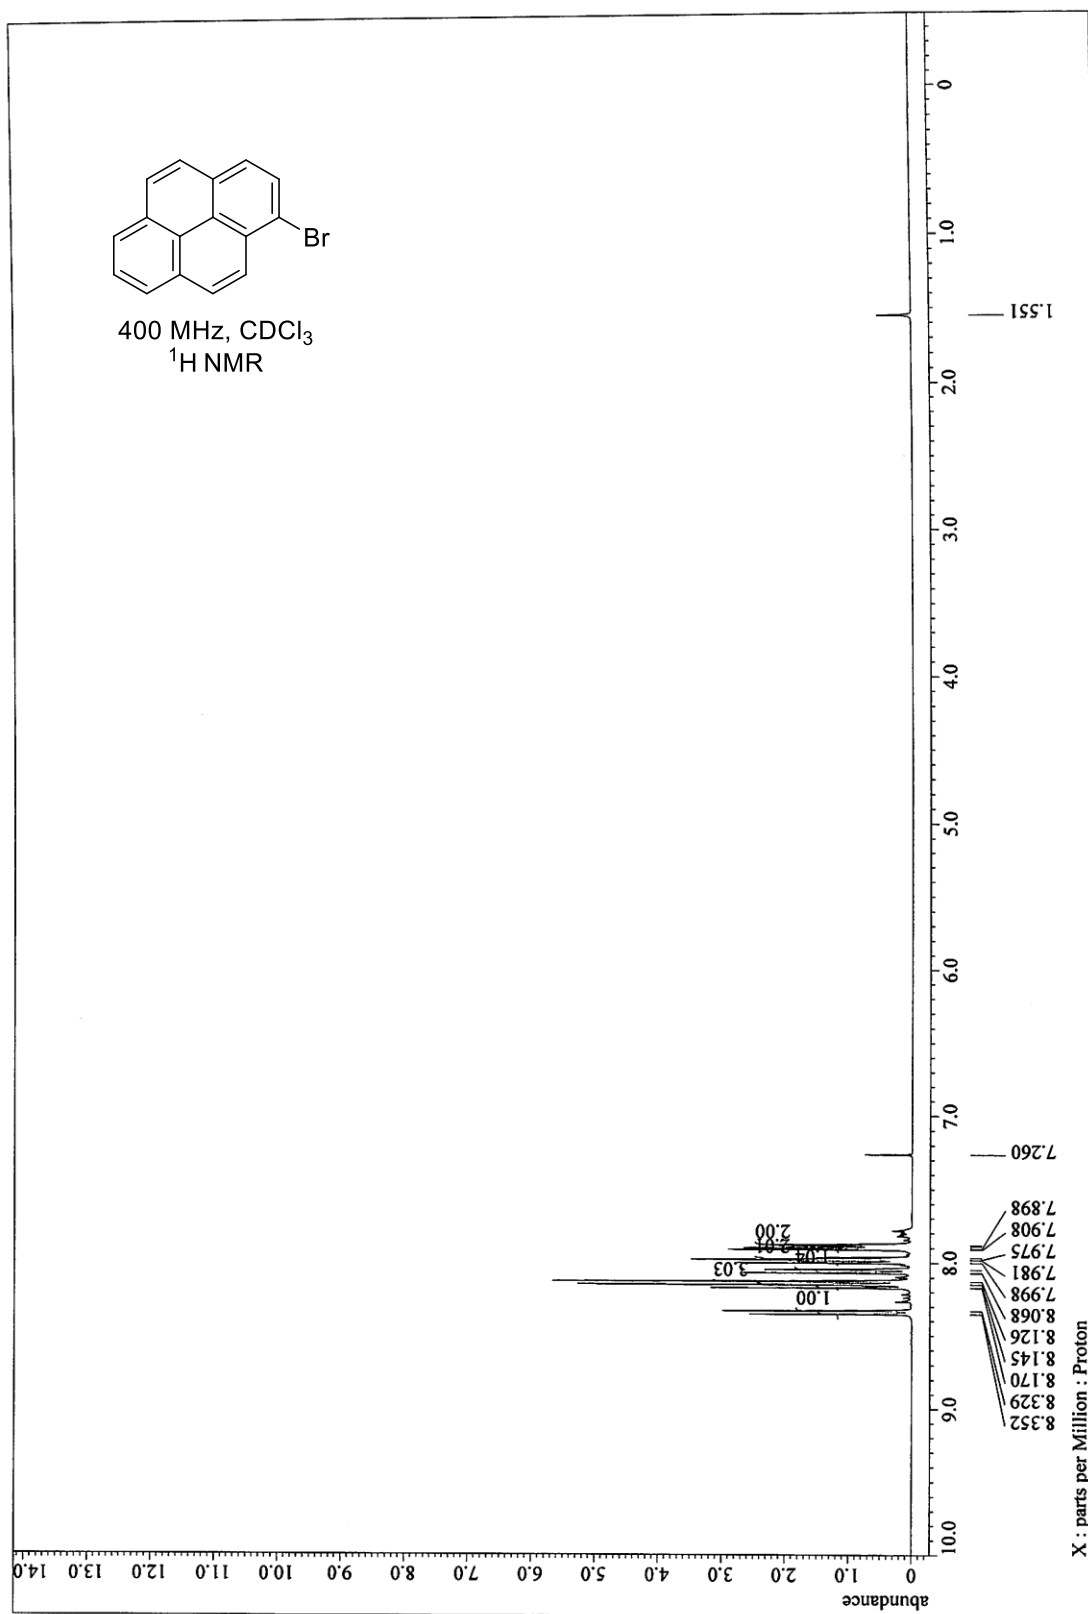

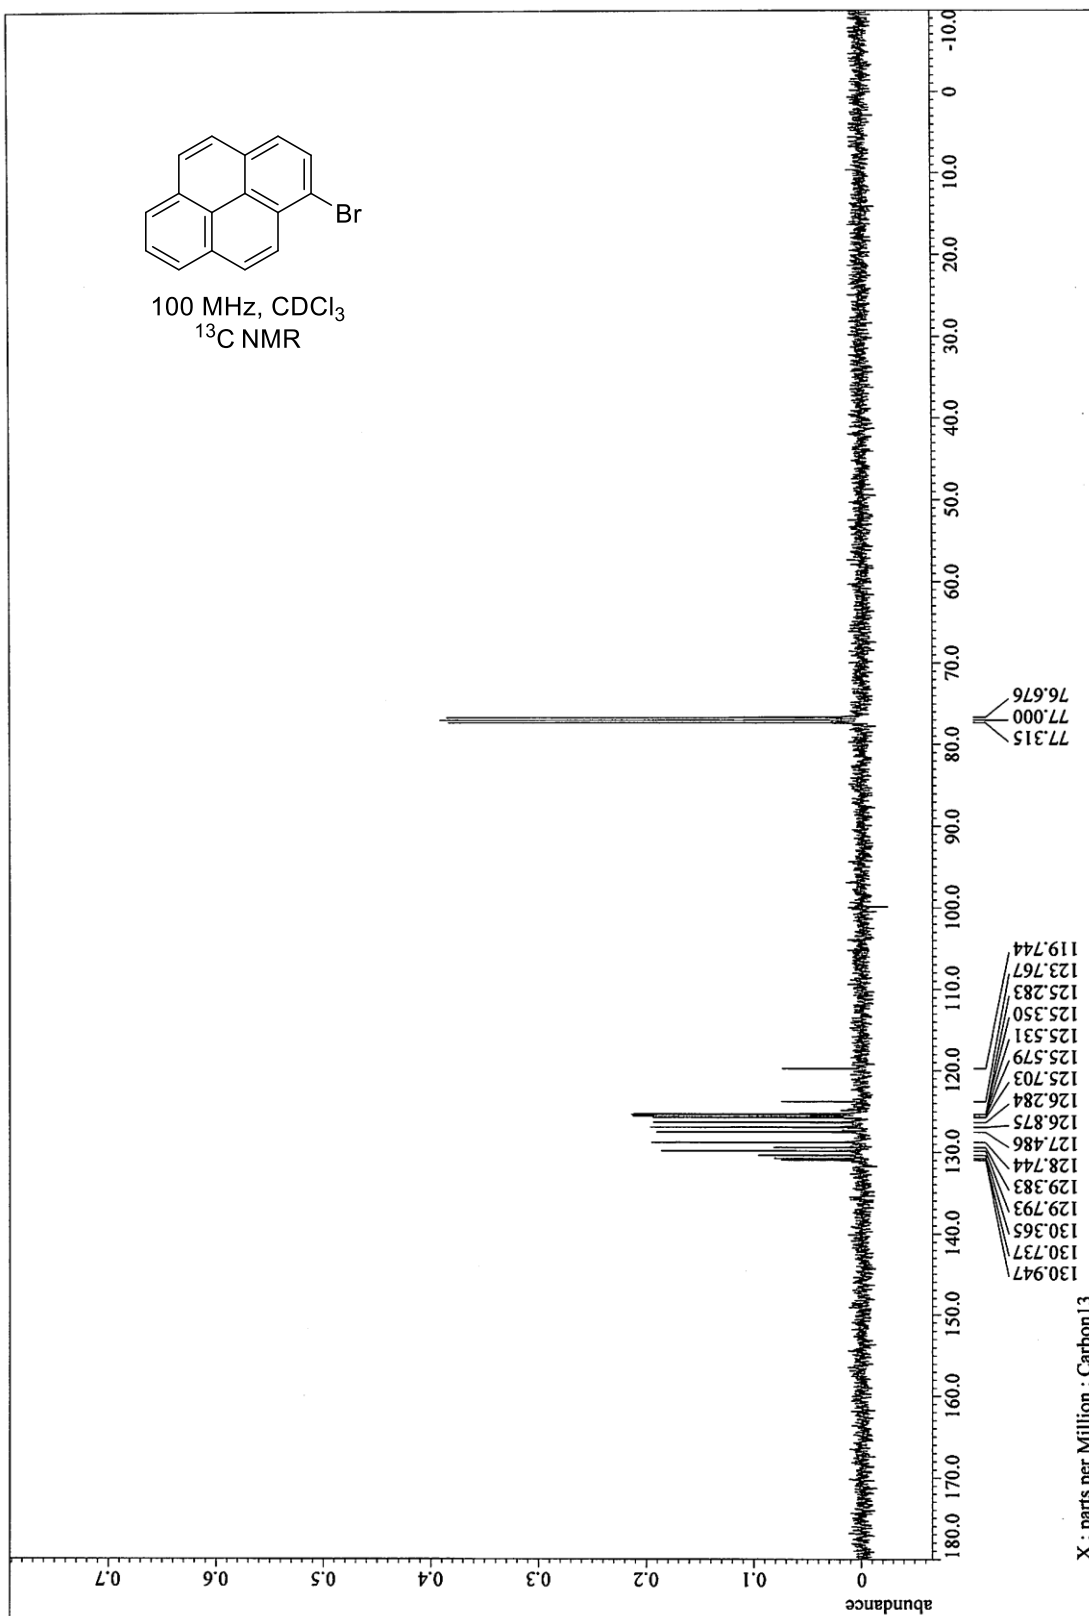

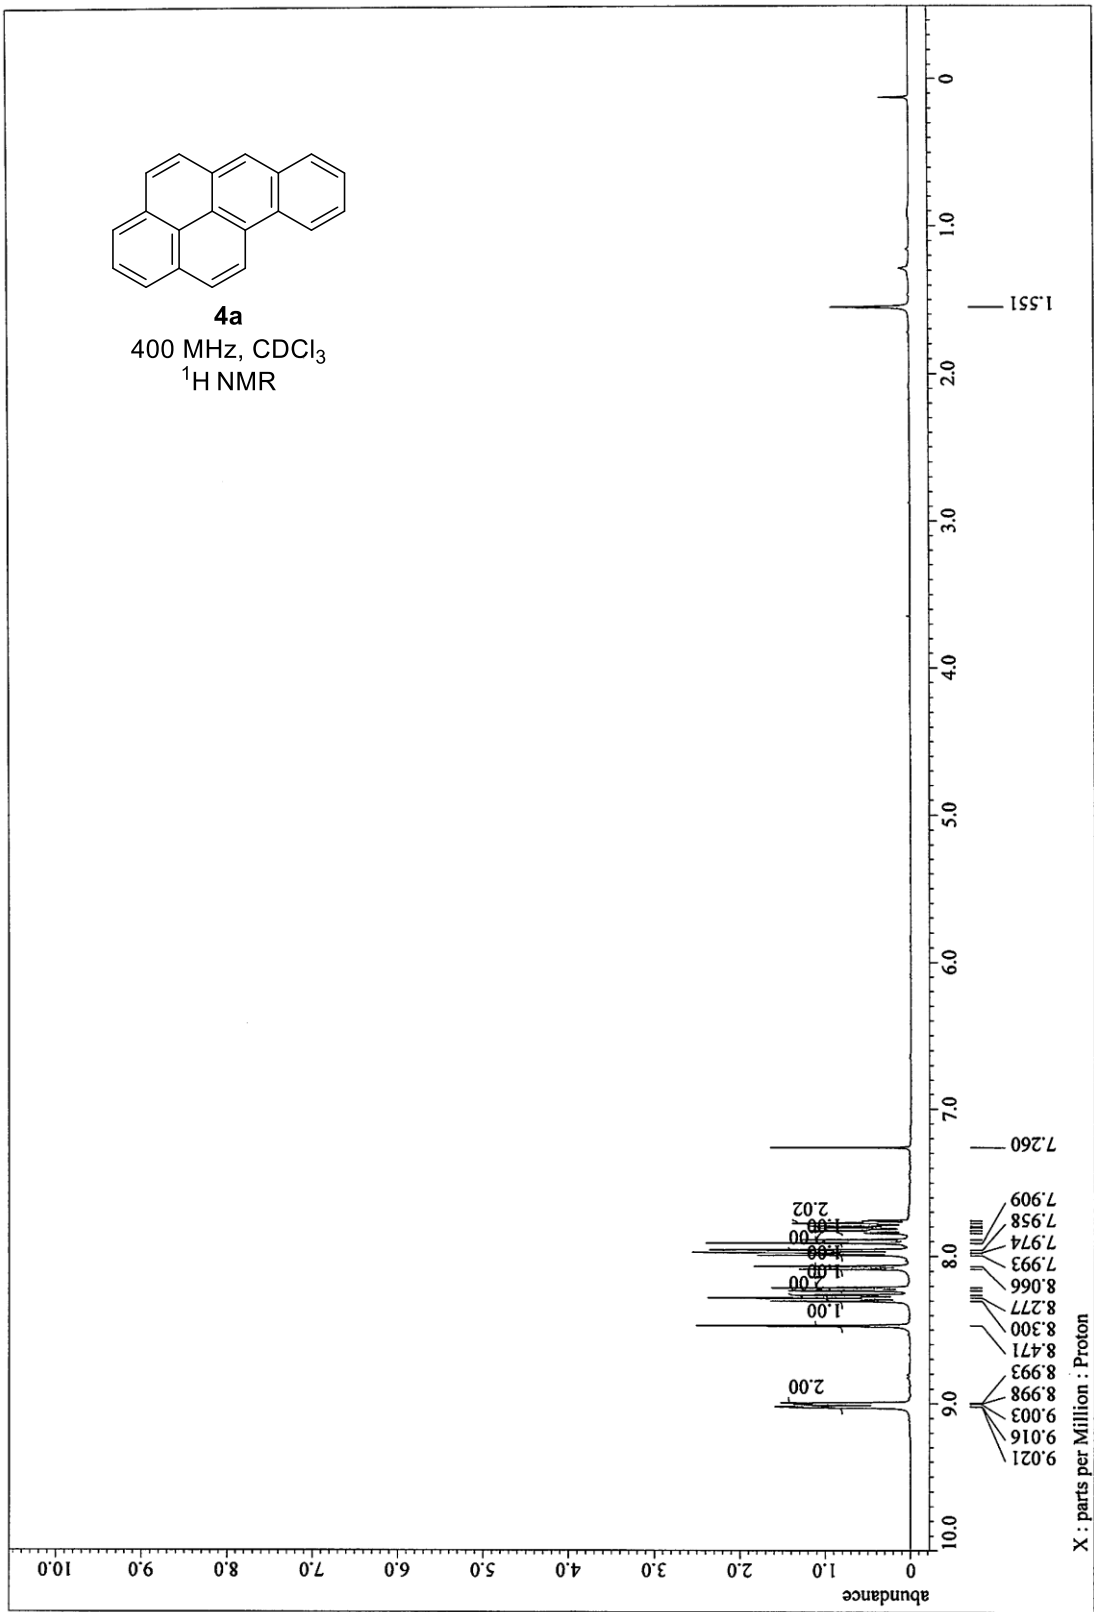

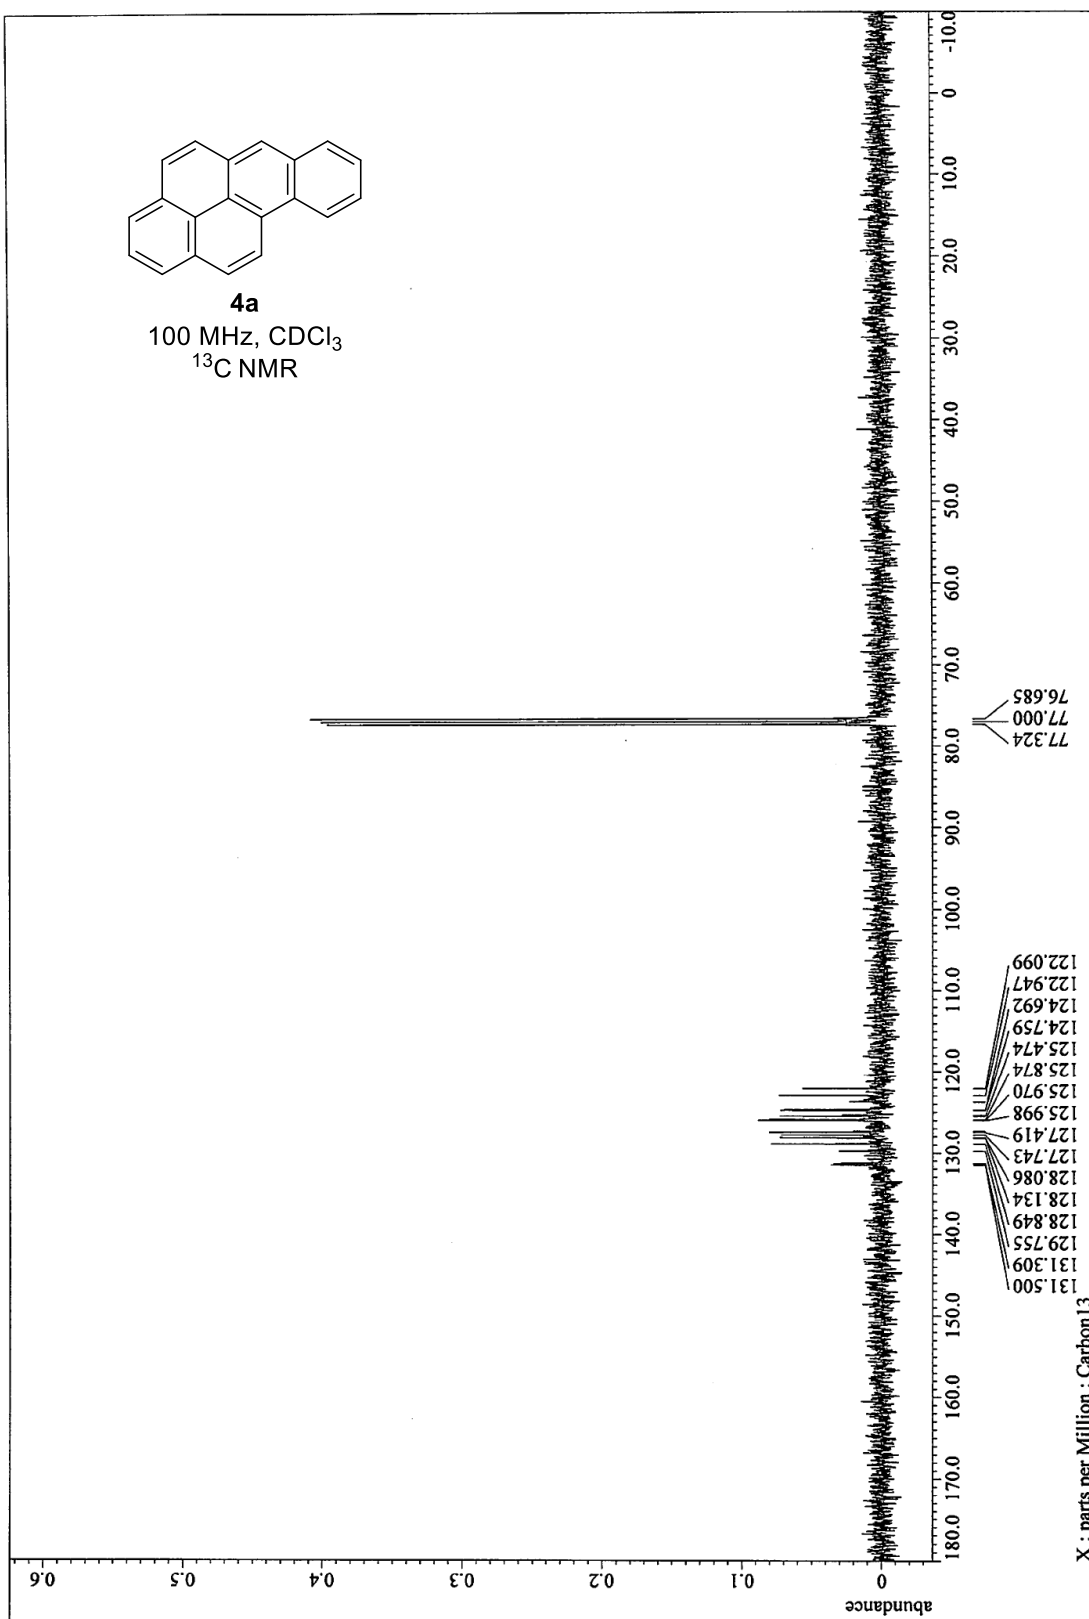

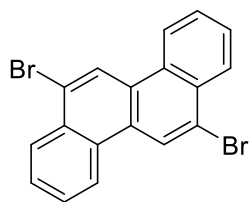

400 MHz, CDCl<sub>3</sub>  
<sup>1</sup>H NMR

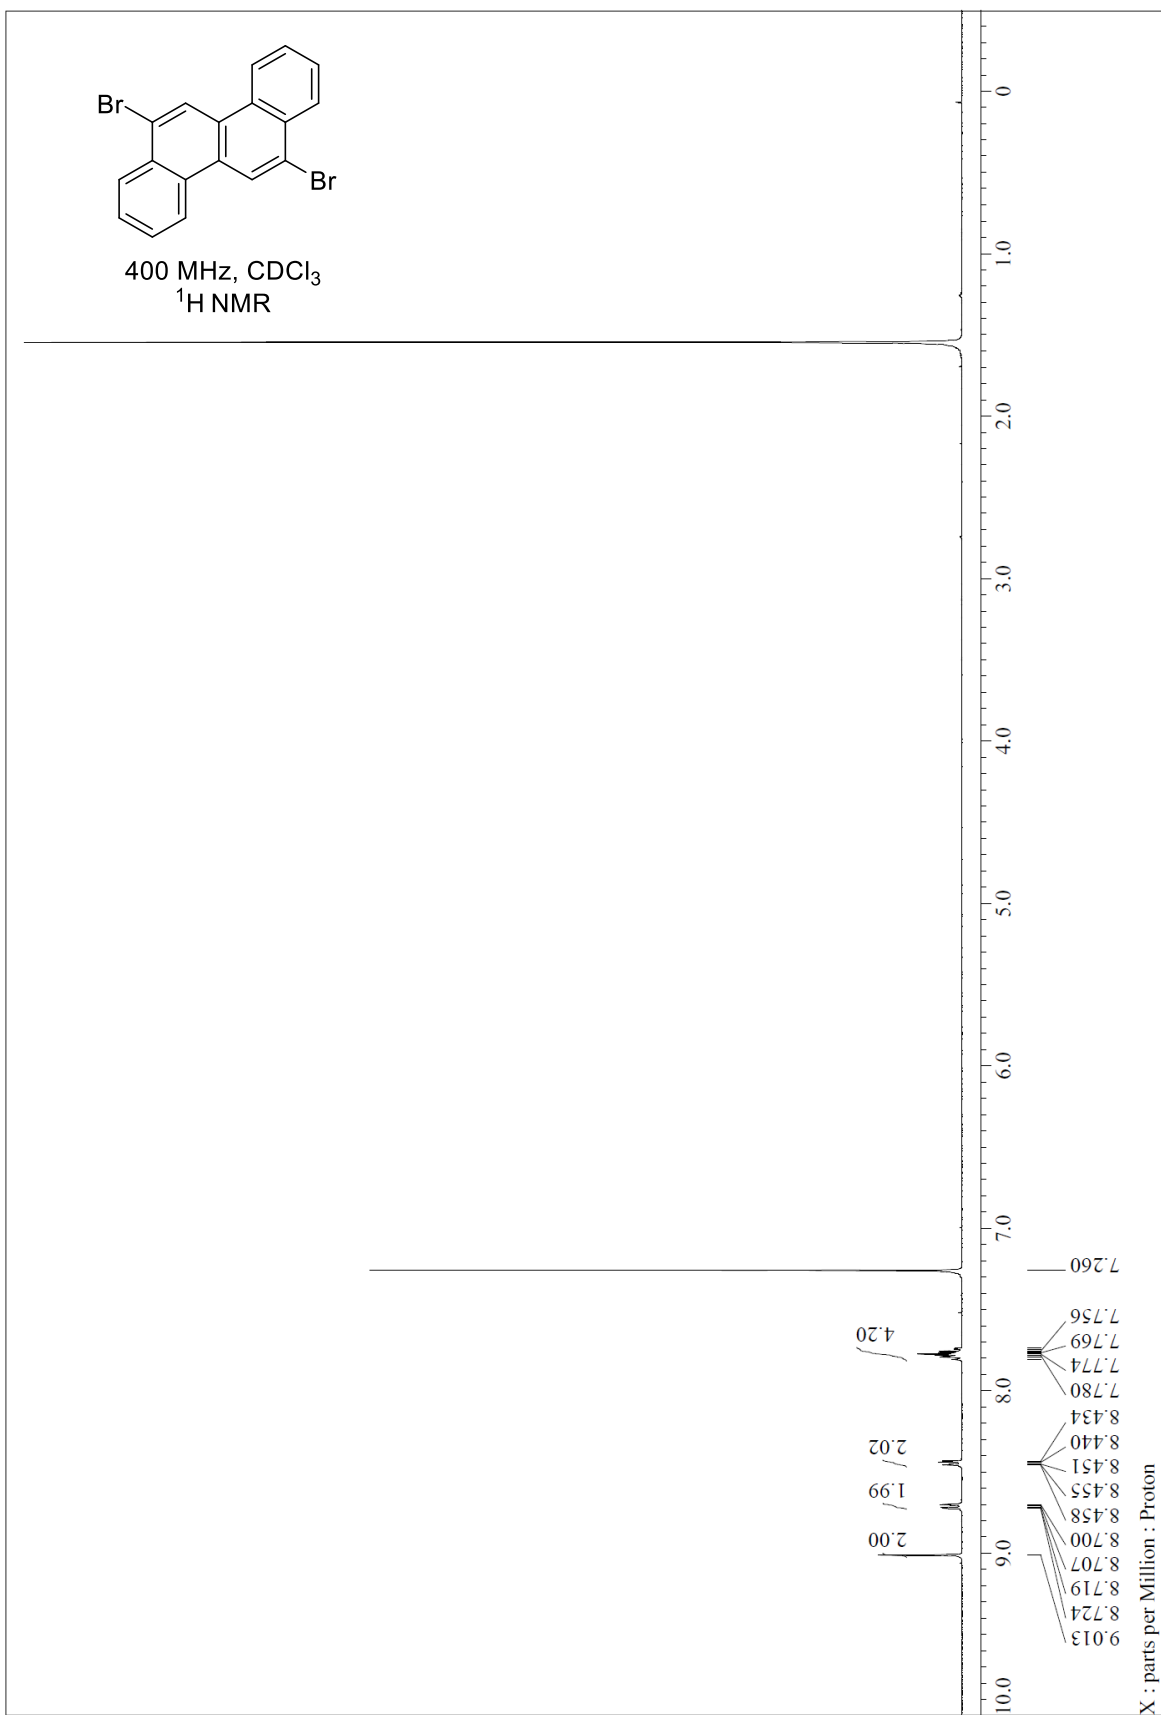

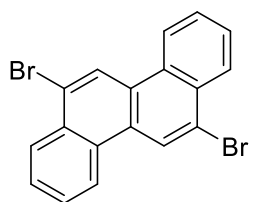

100 MHz, CDCl<sub>3</sub>  
<sup>13</sup>C NMR

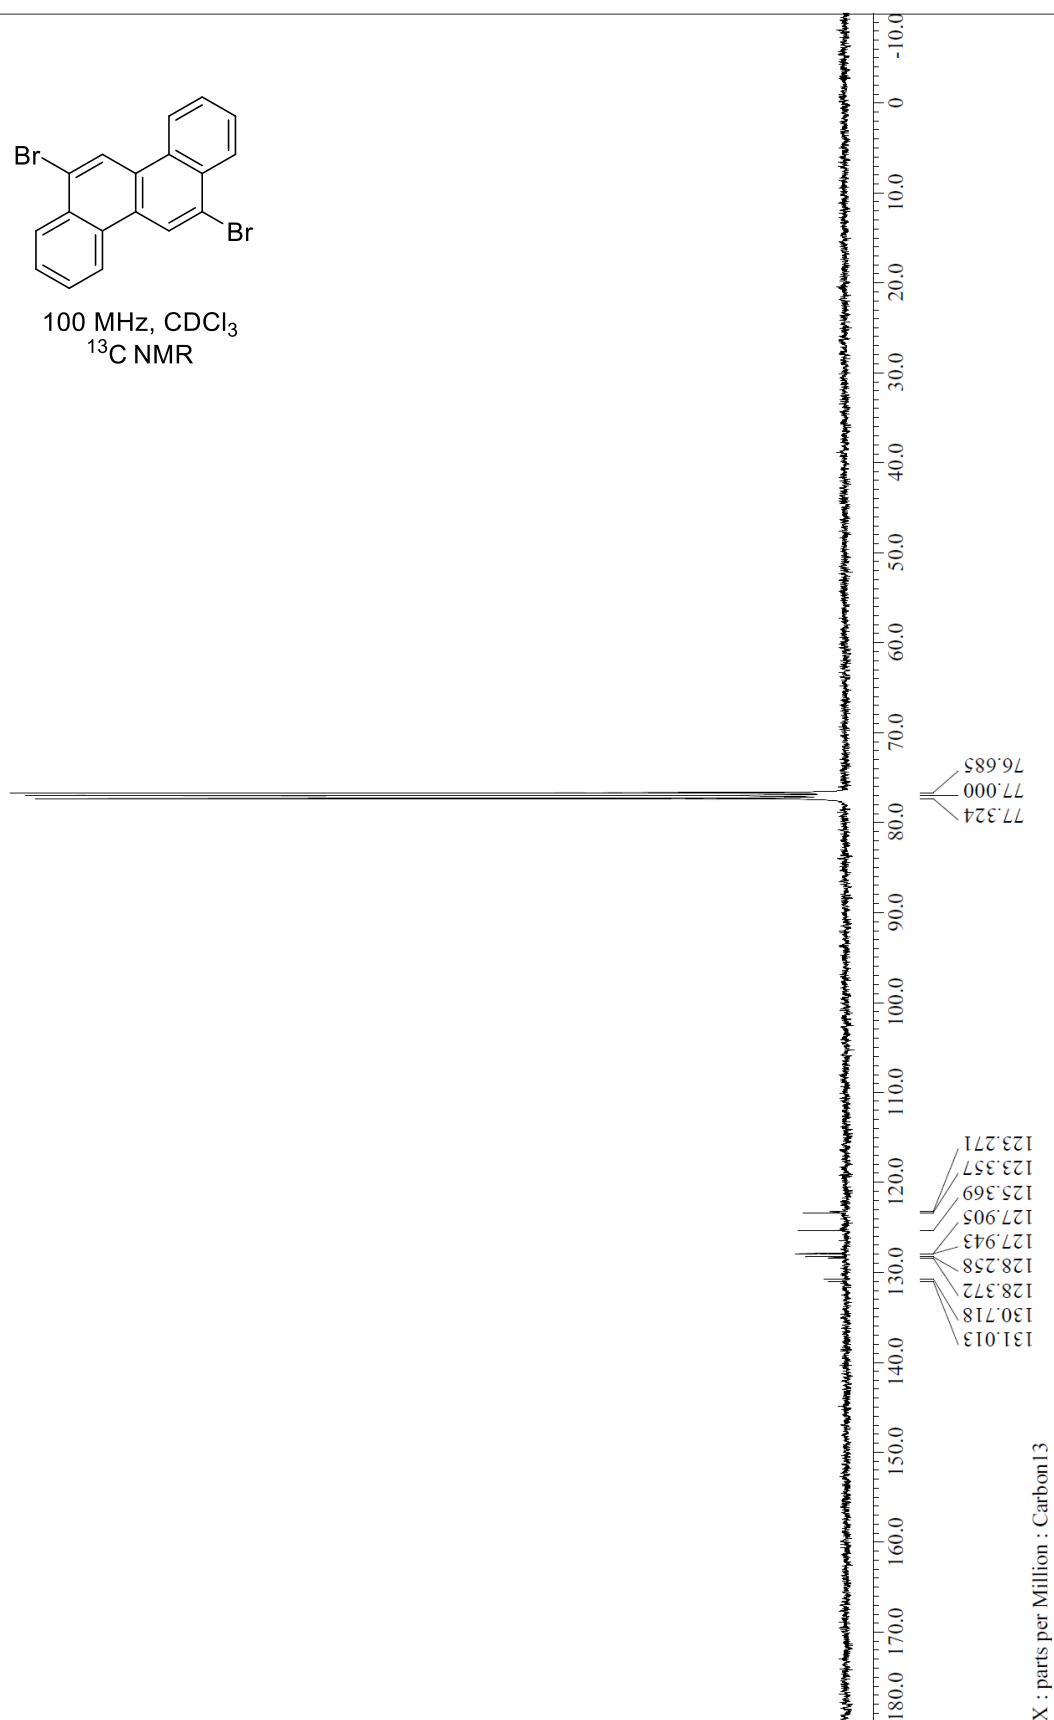

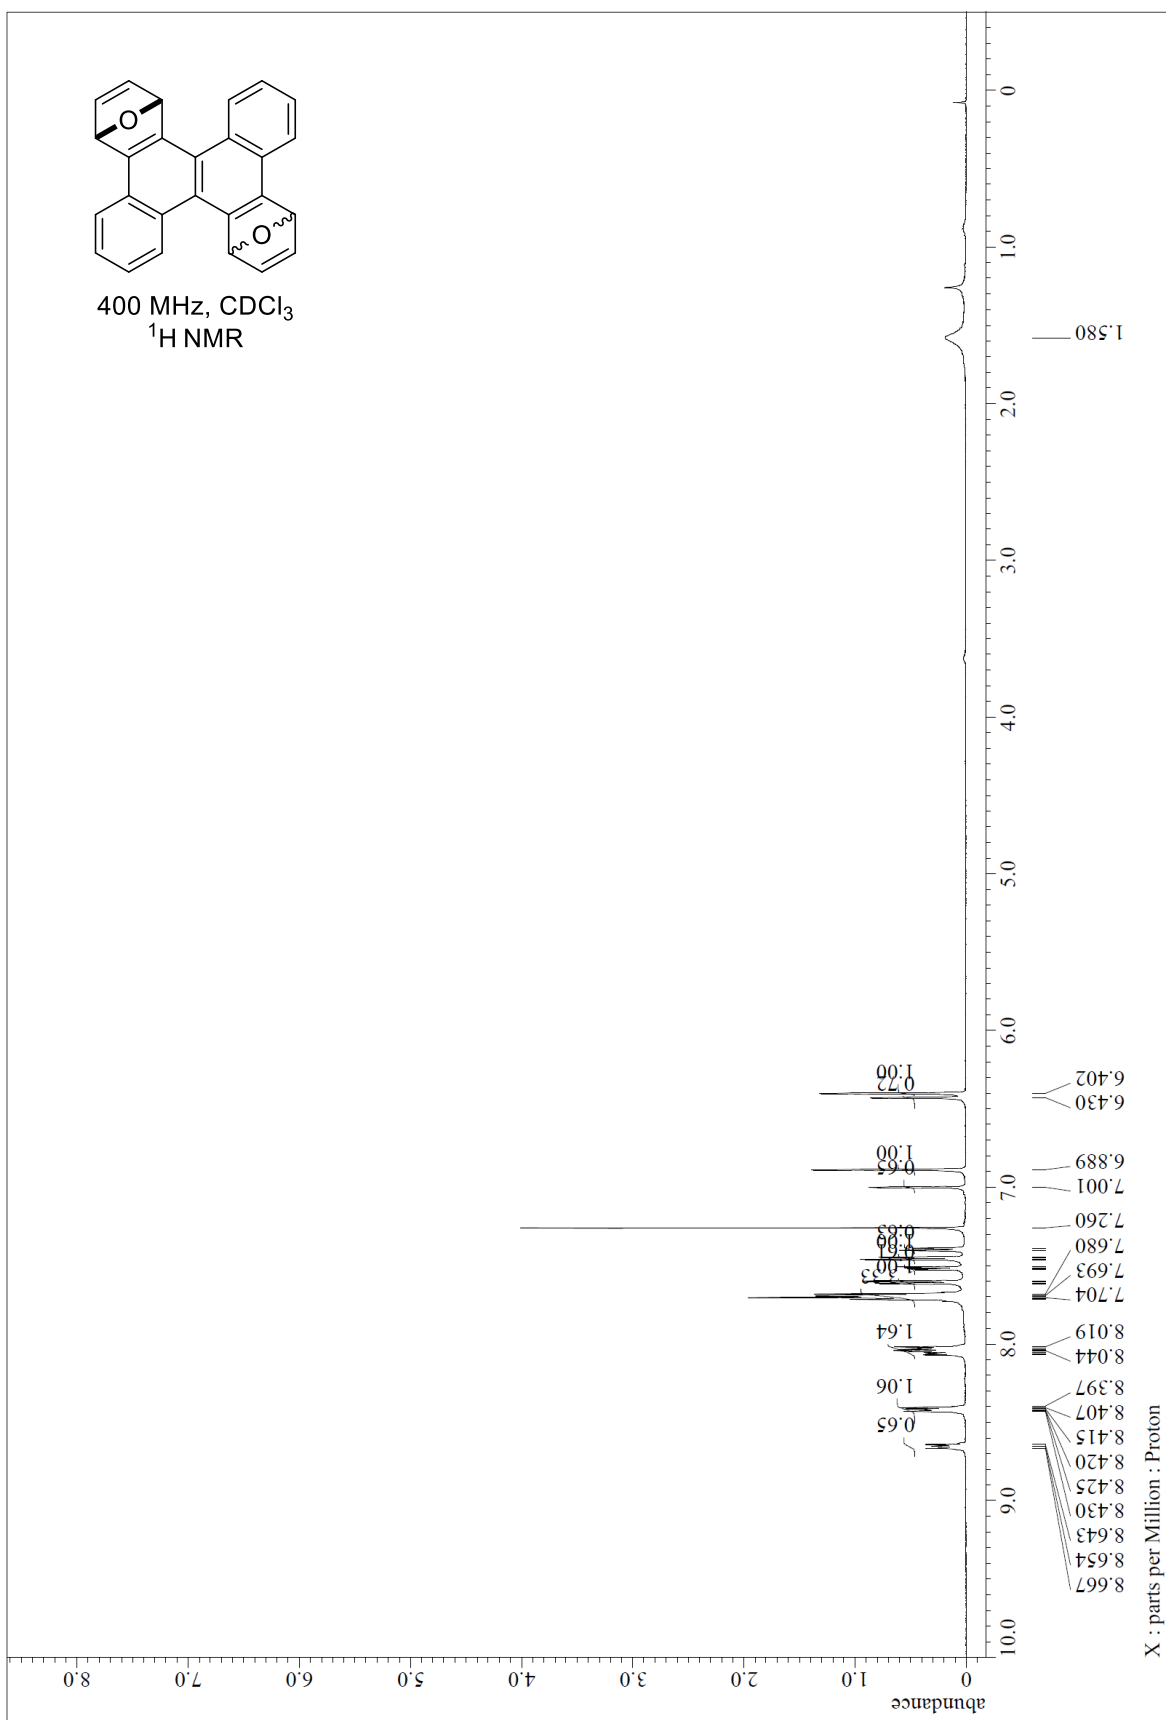



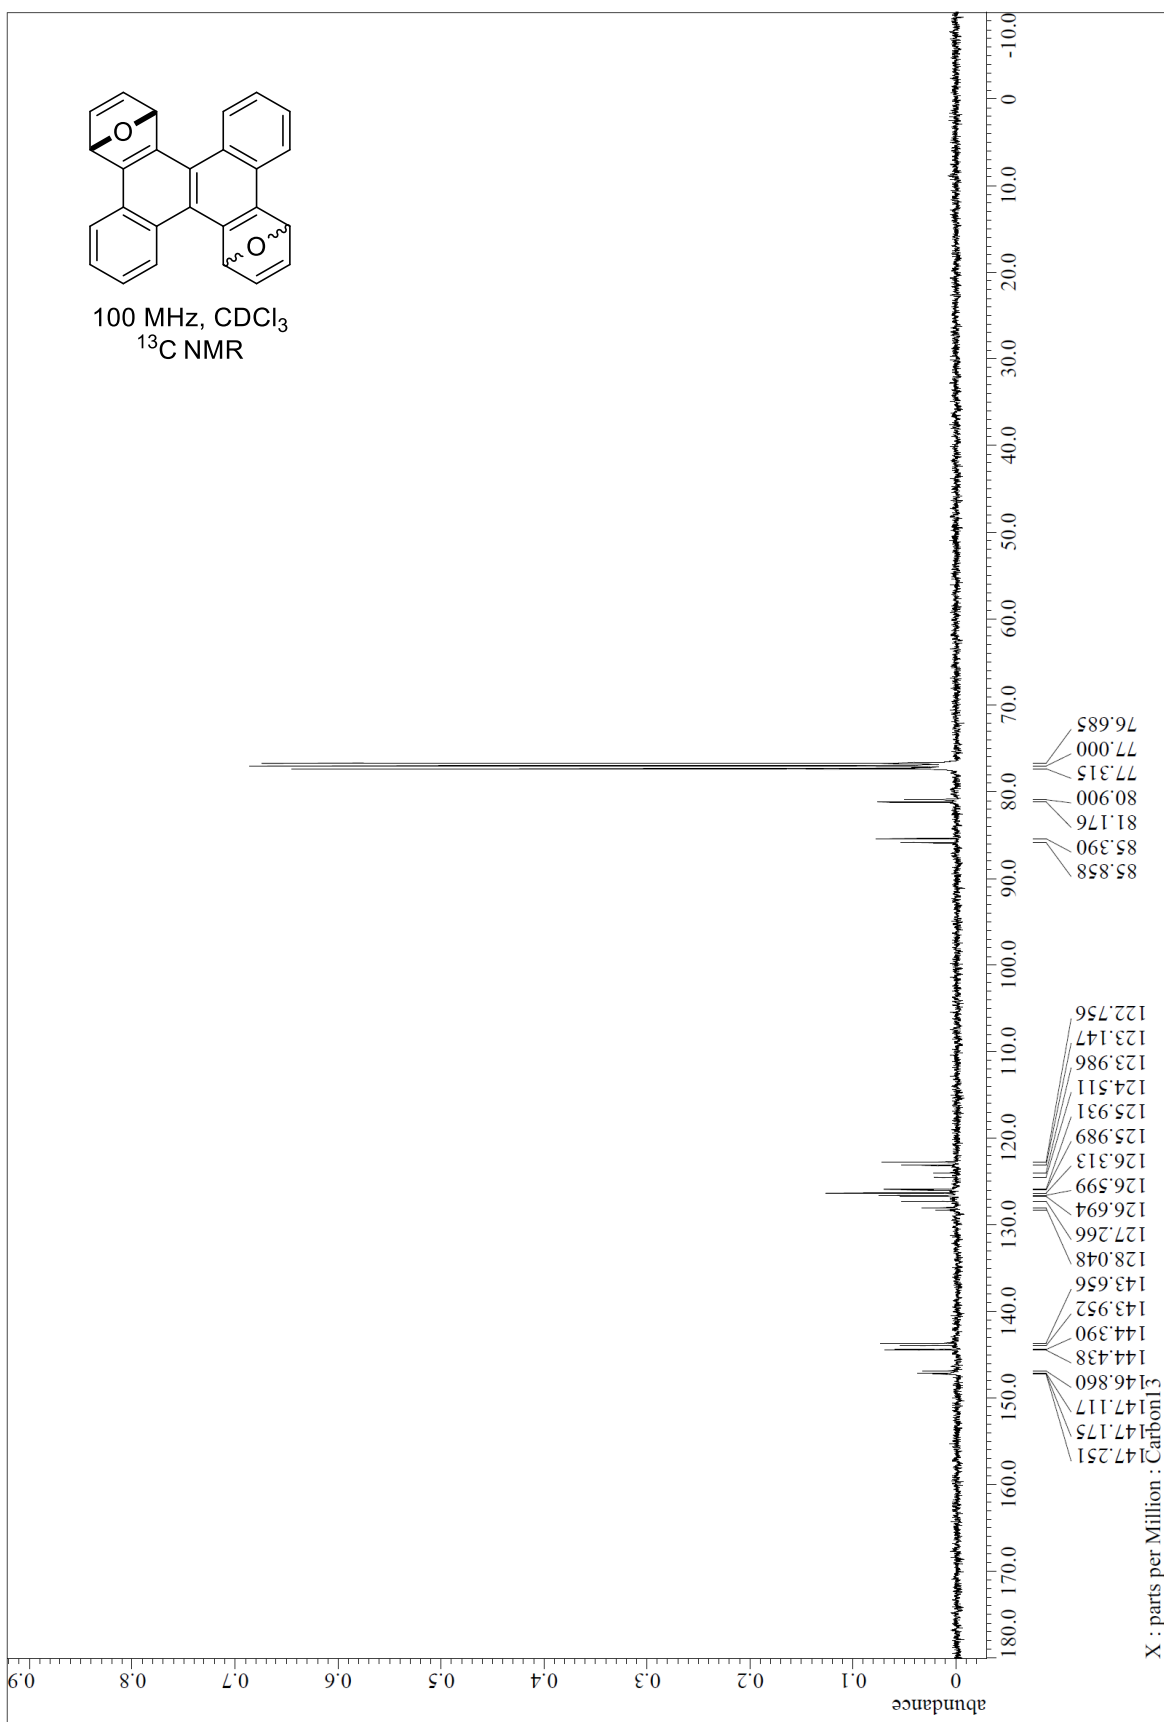

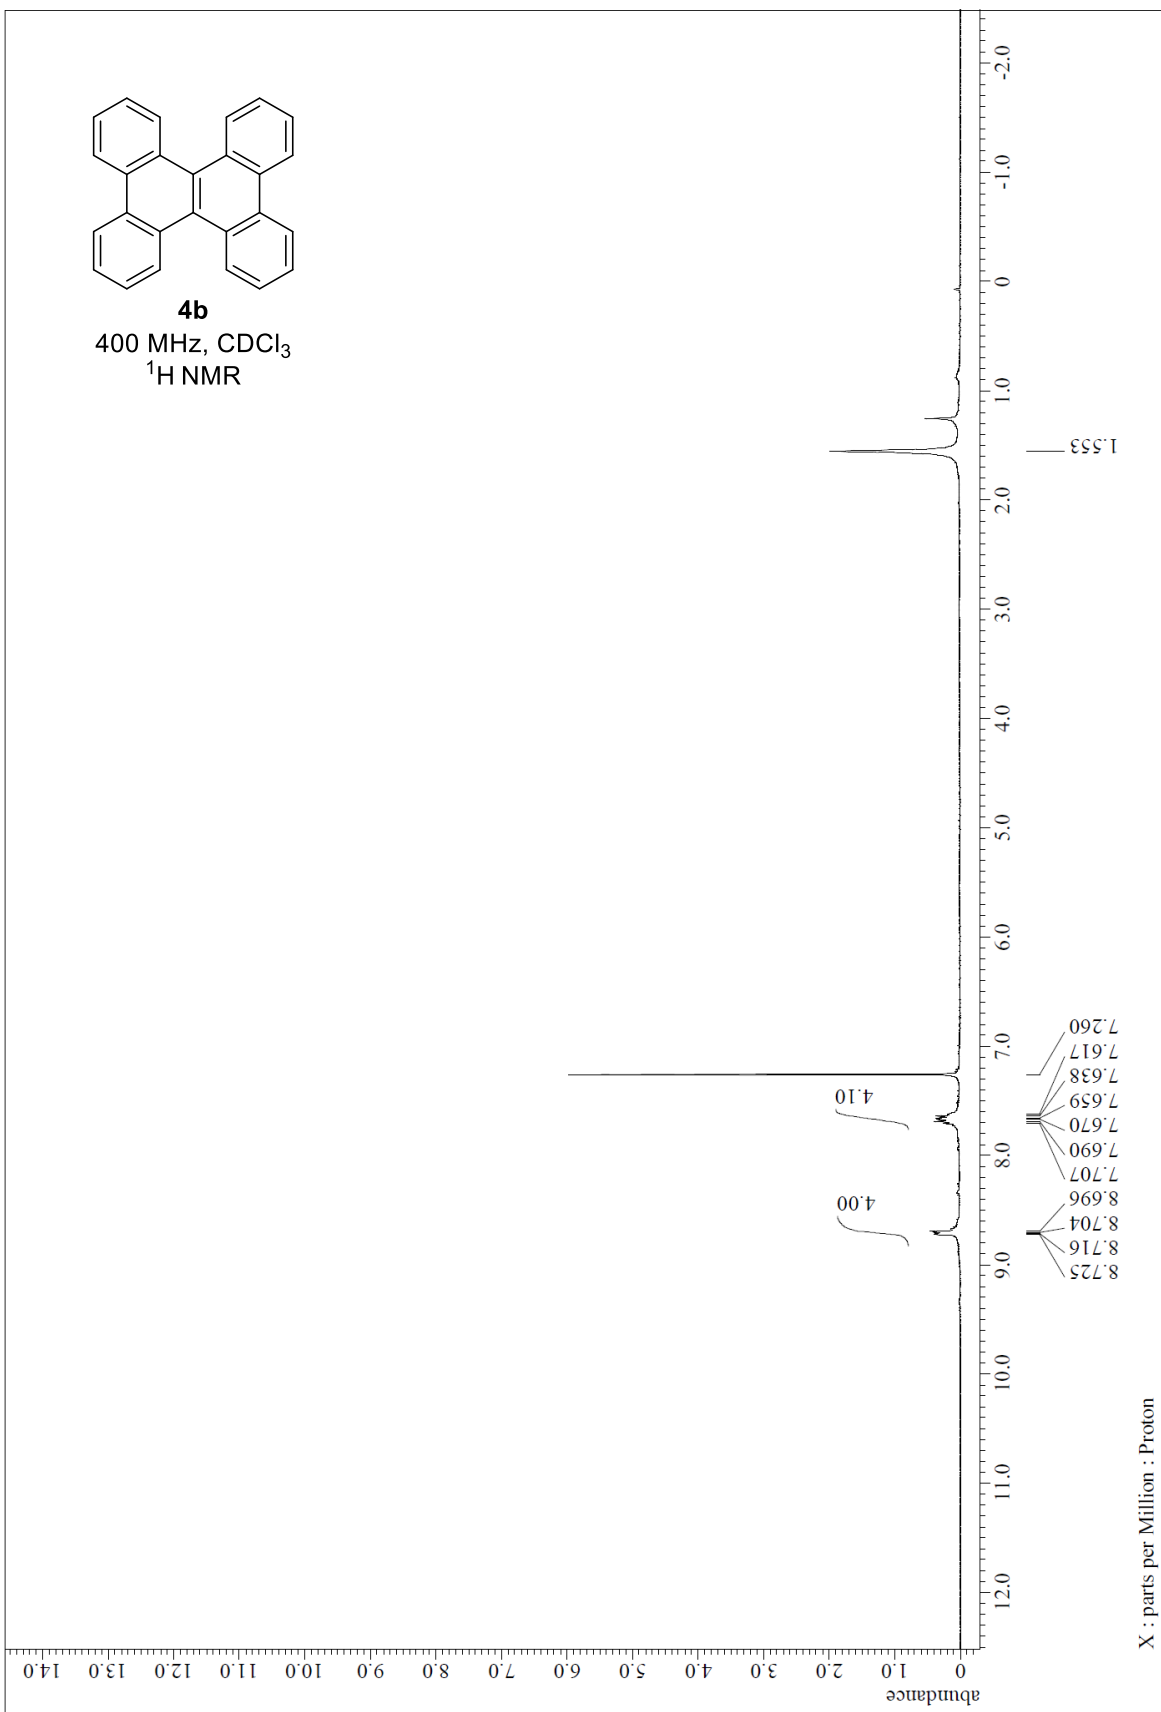

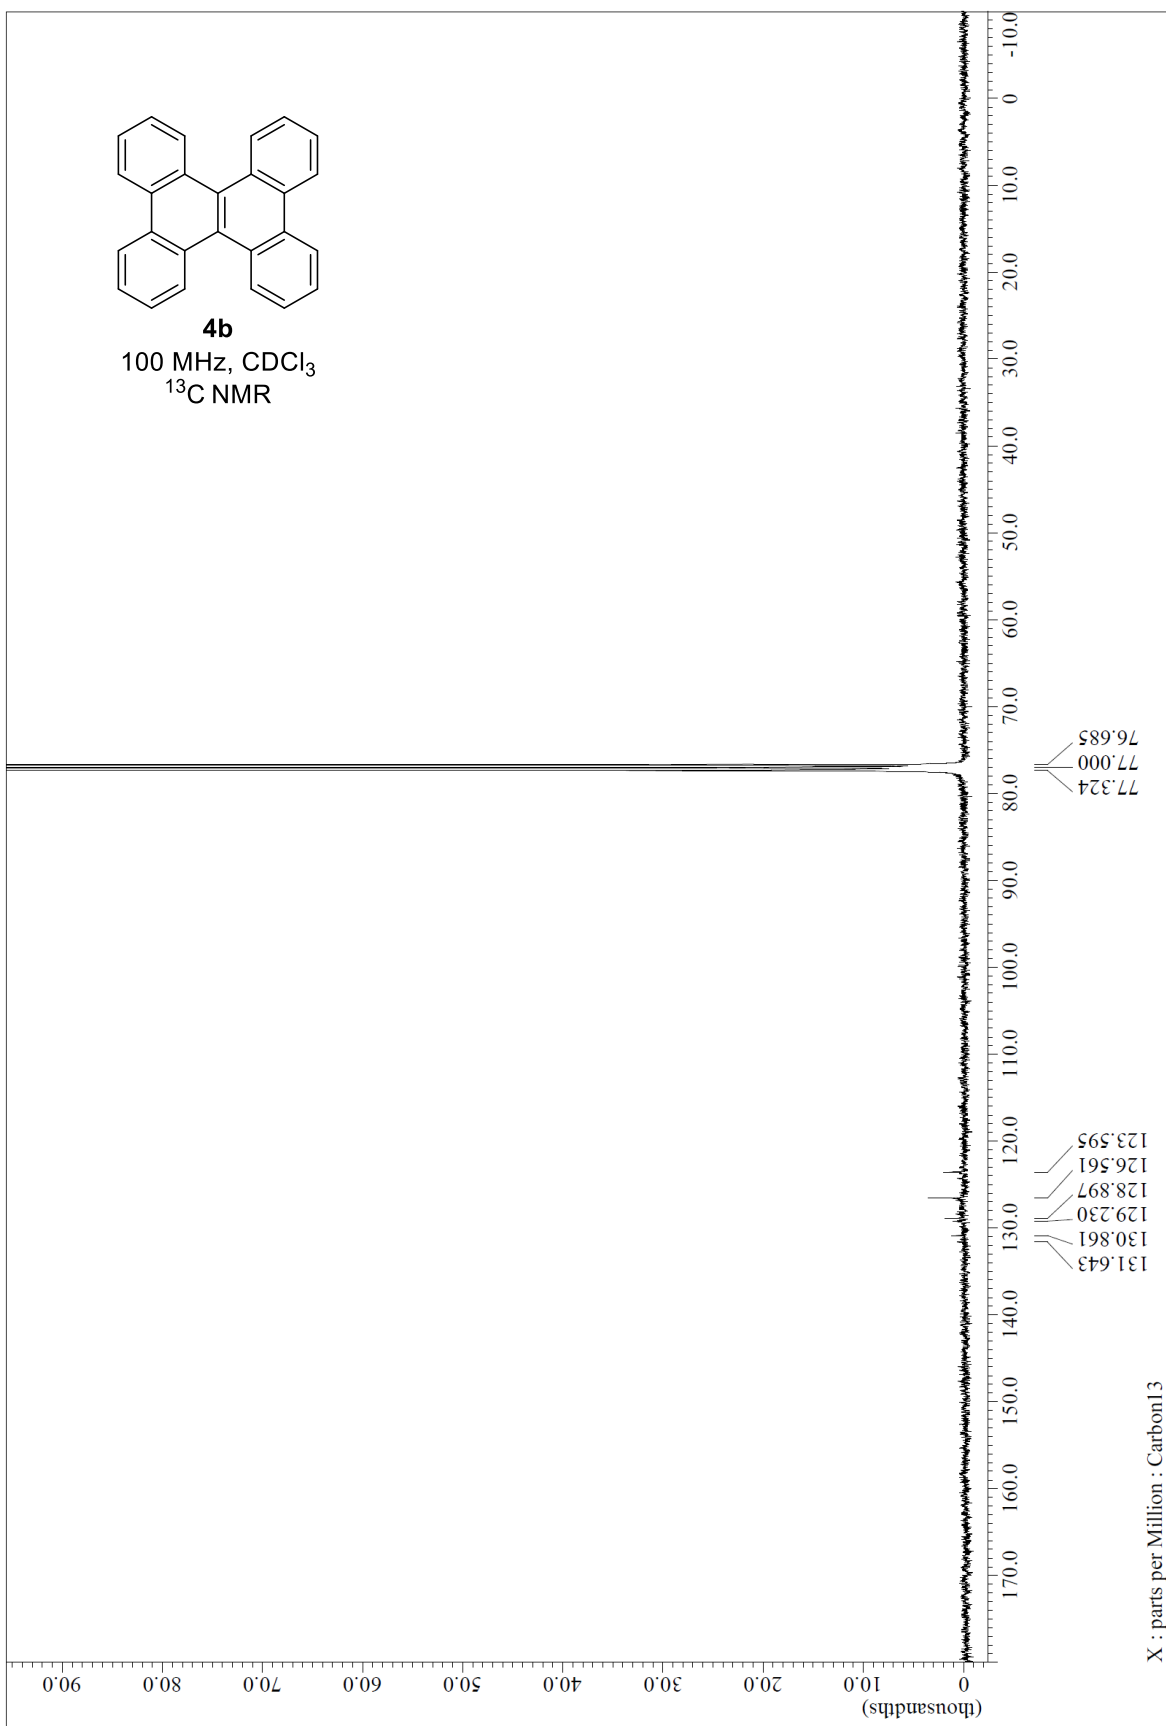

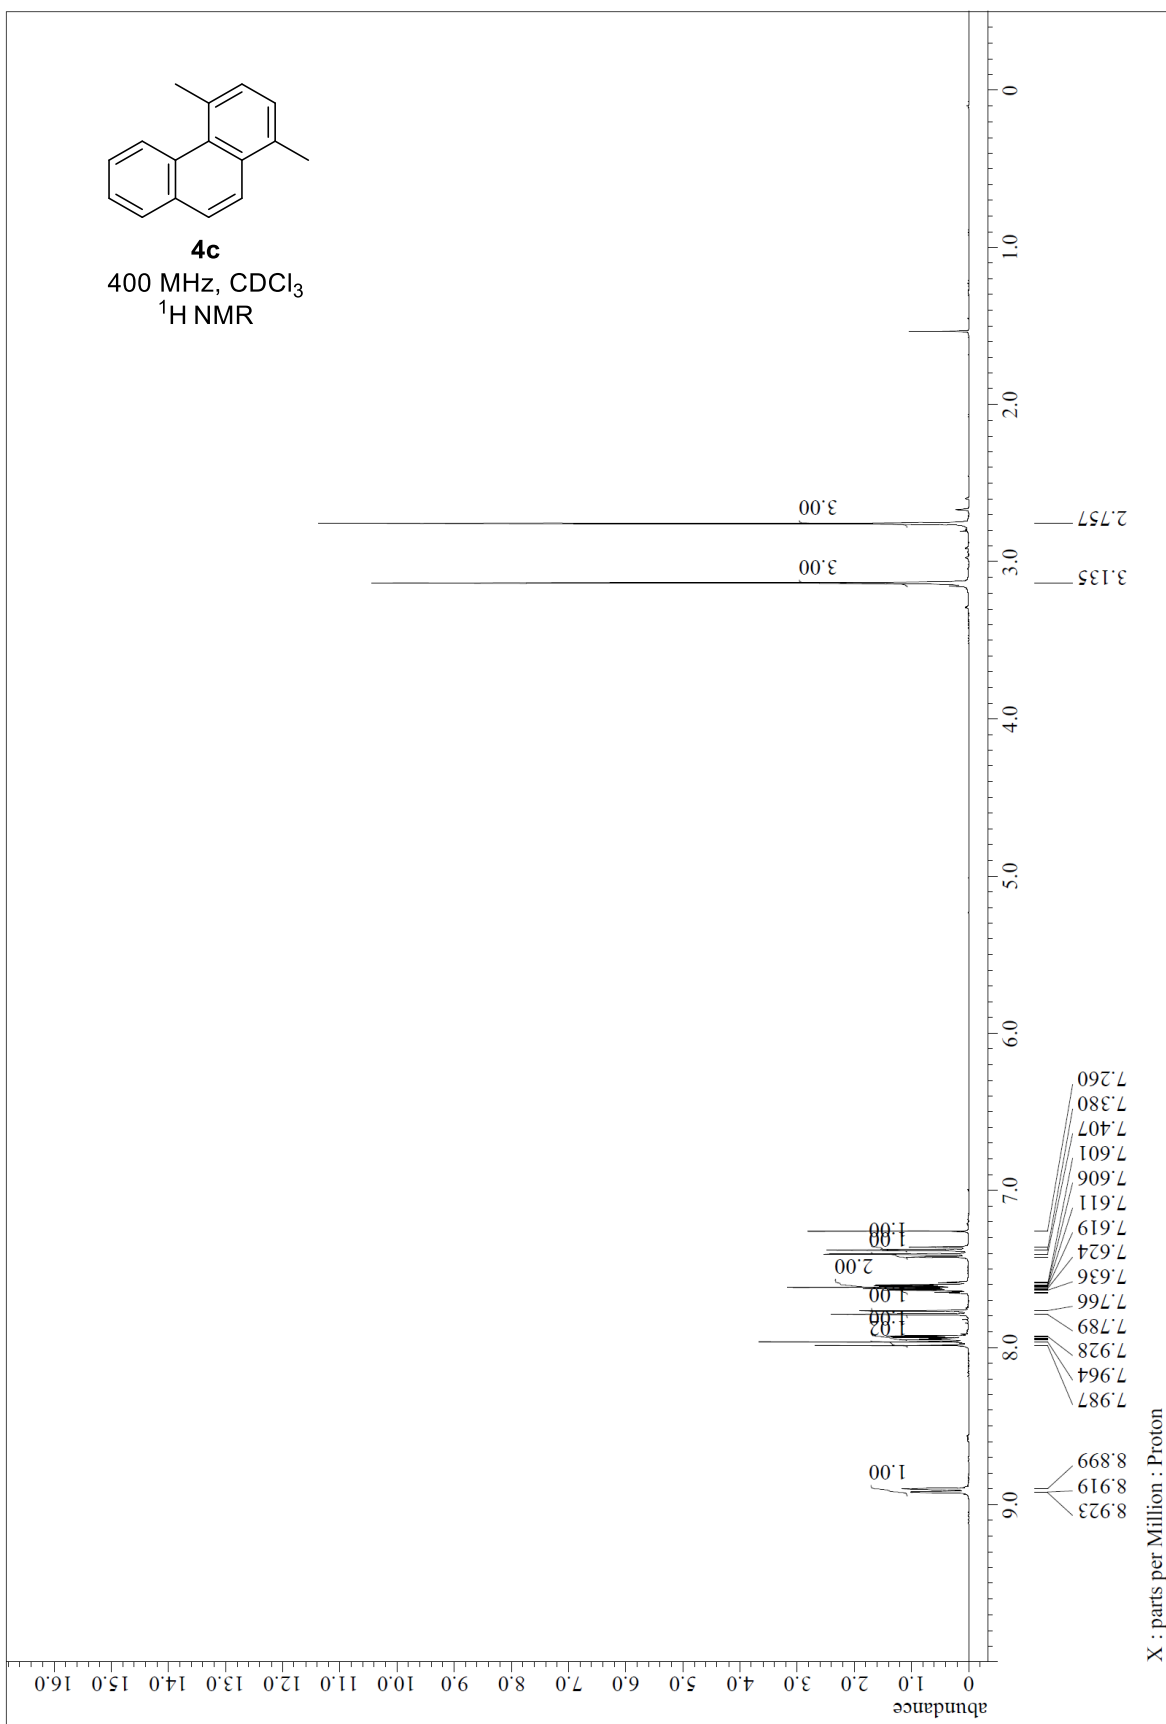

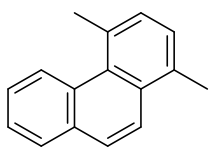

**4c**

100 MHz, CDCl<sub>3</sub>  
<sup>13</sup>C NMR

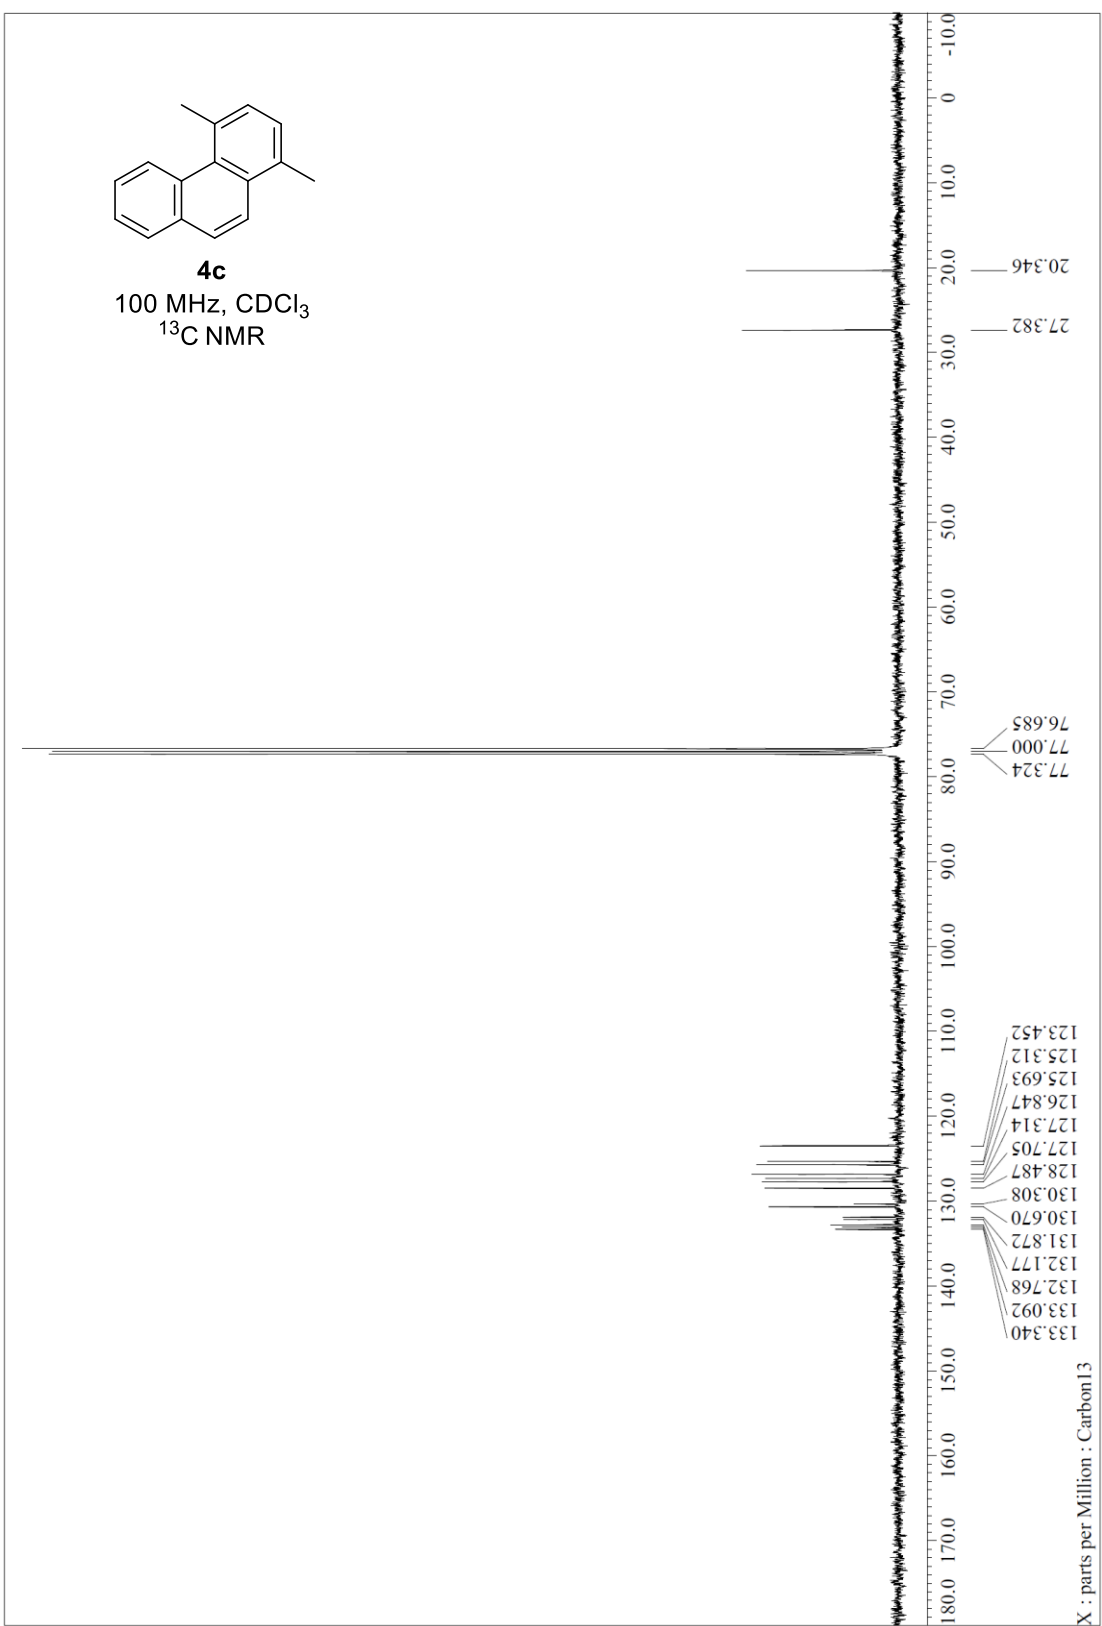

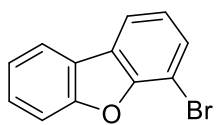

400 MHz, CDCl<sub>3</sub>  
<sup>1</sup>H NMR

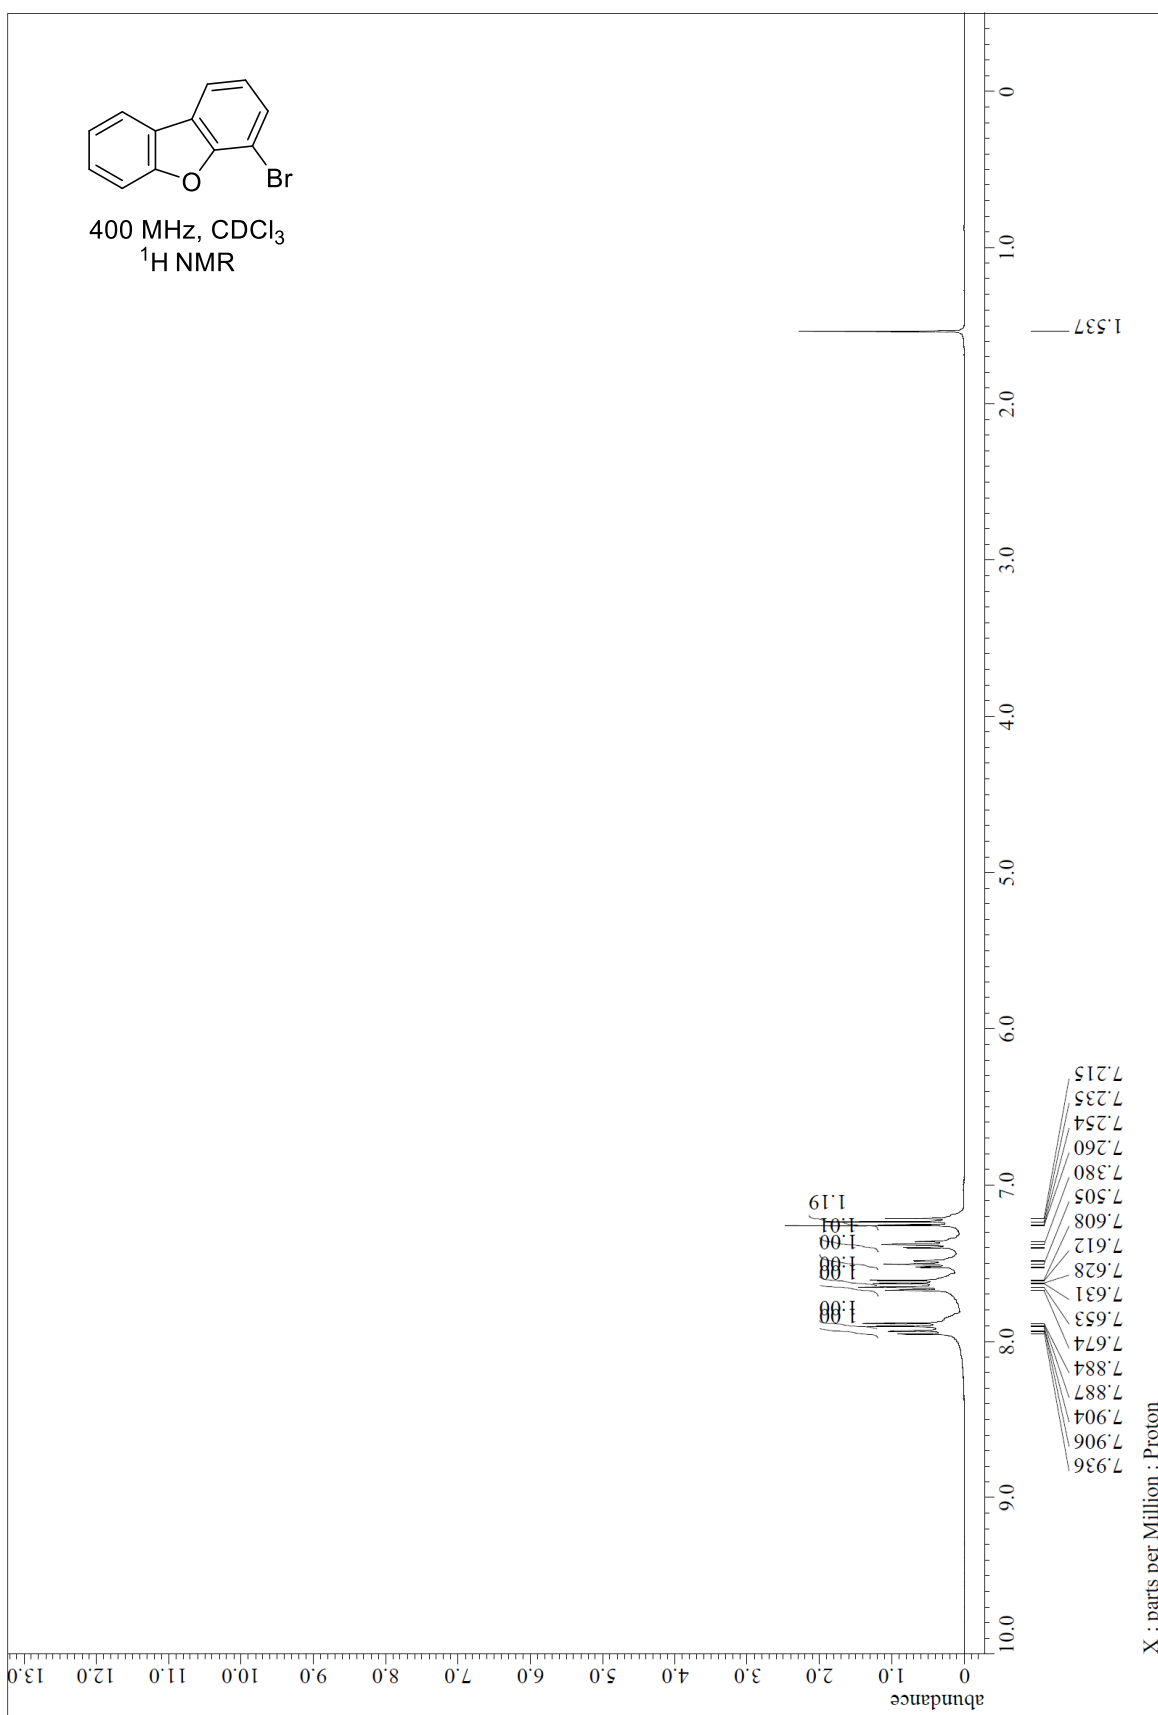

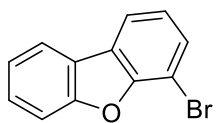

100 MHz, CDCl<sub>3</sub>  
<sup>13</sup>C NMR

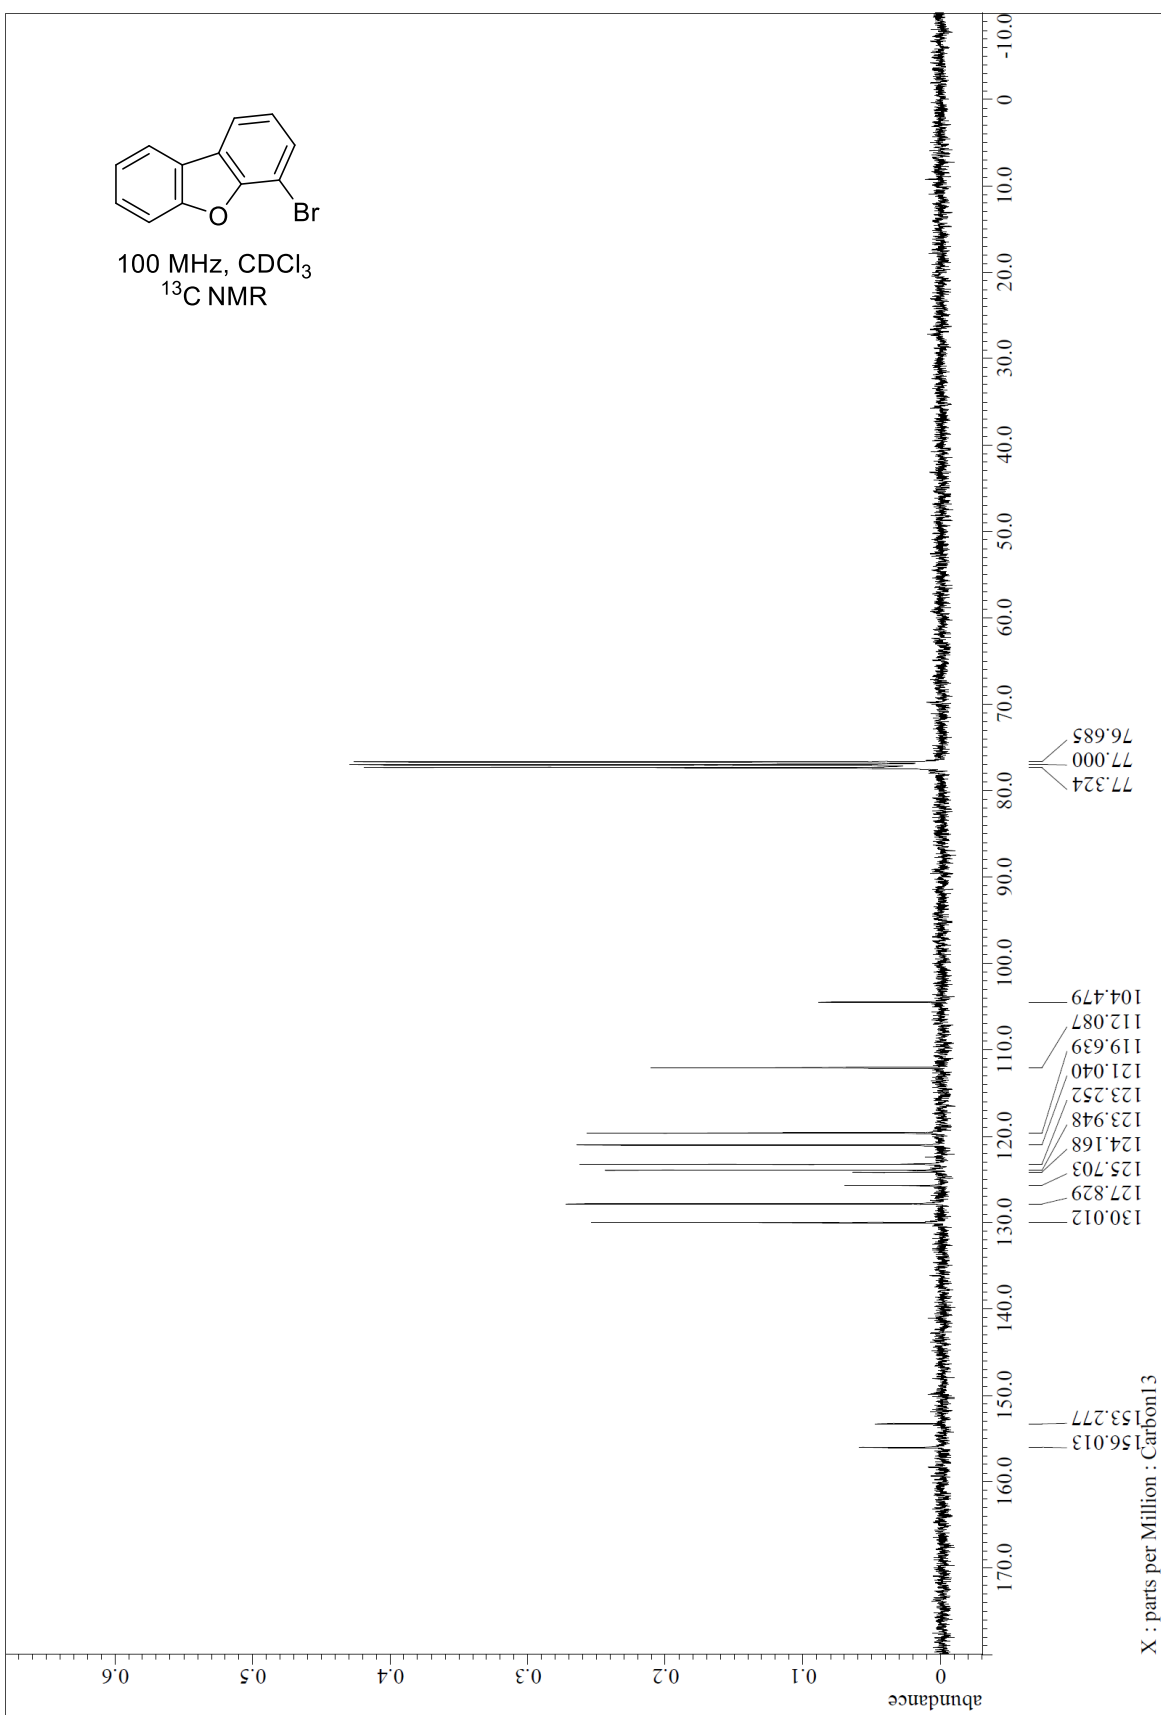

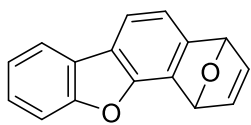

400 MHz, CDCl<sub>3</sub>  
<sup>1</sup>H NMR

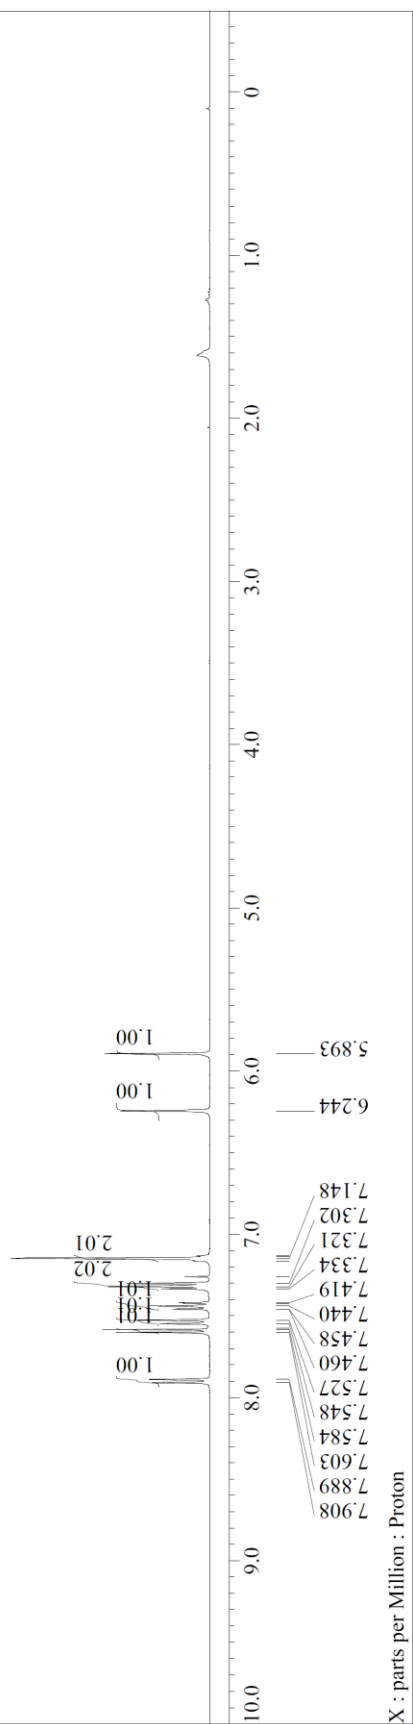



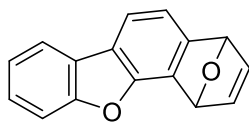

100 MHz, CDCl<sub>3</sub>  
<sup>13</sup>C NMR

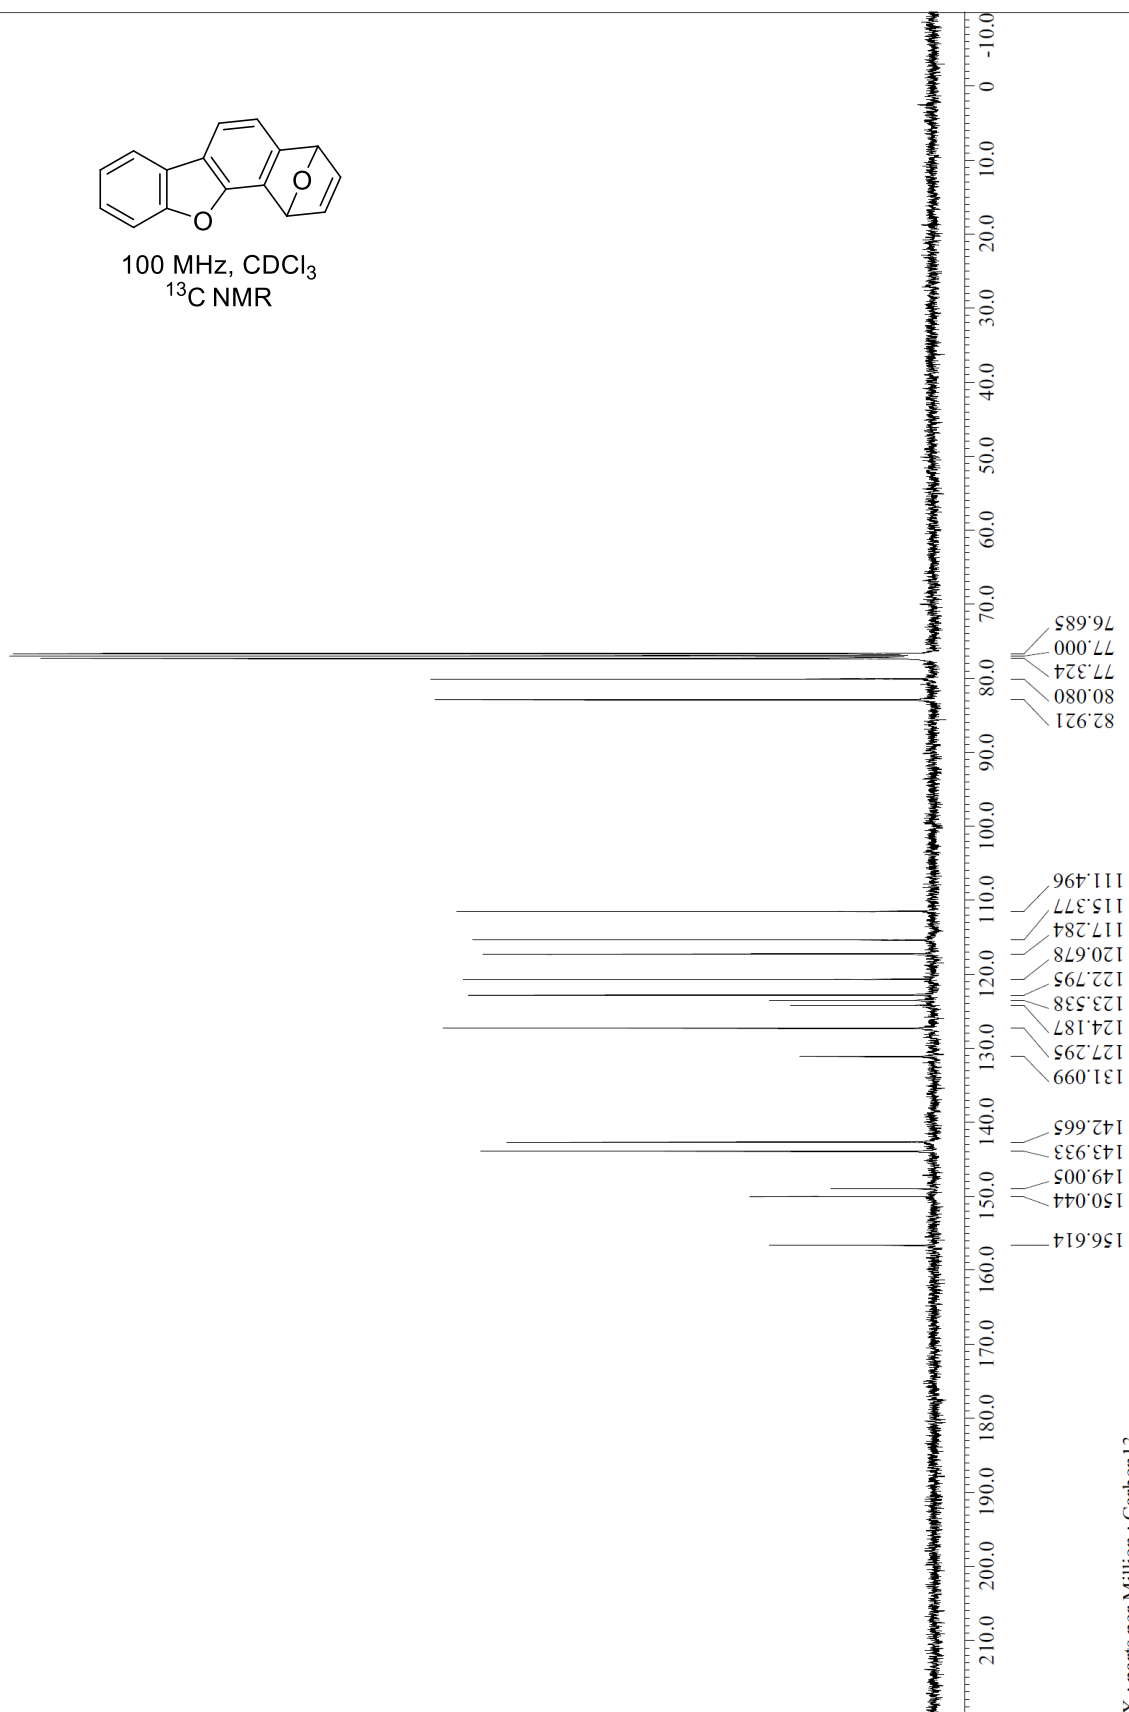

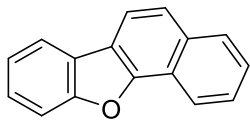

**4d**

400 MHz, CDCl<sub>3</sub>  
<sup>1</sup>H NMR

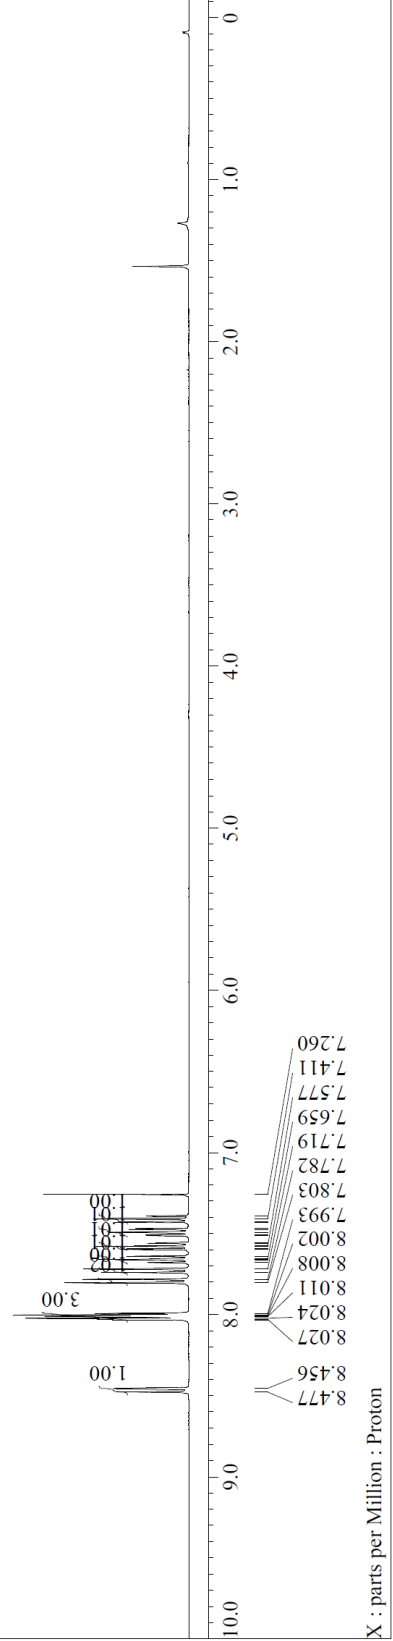

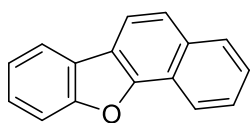

**4d**

100 MHz, CDCl<sub>3</sub>  
<sup>13</sup>C NMR

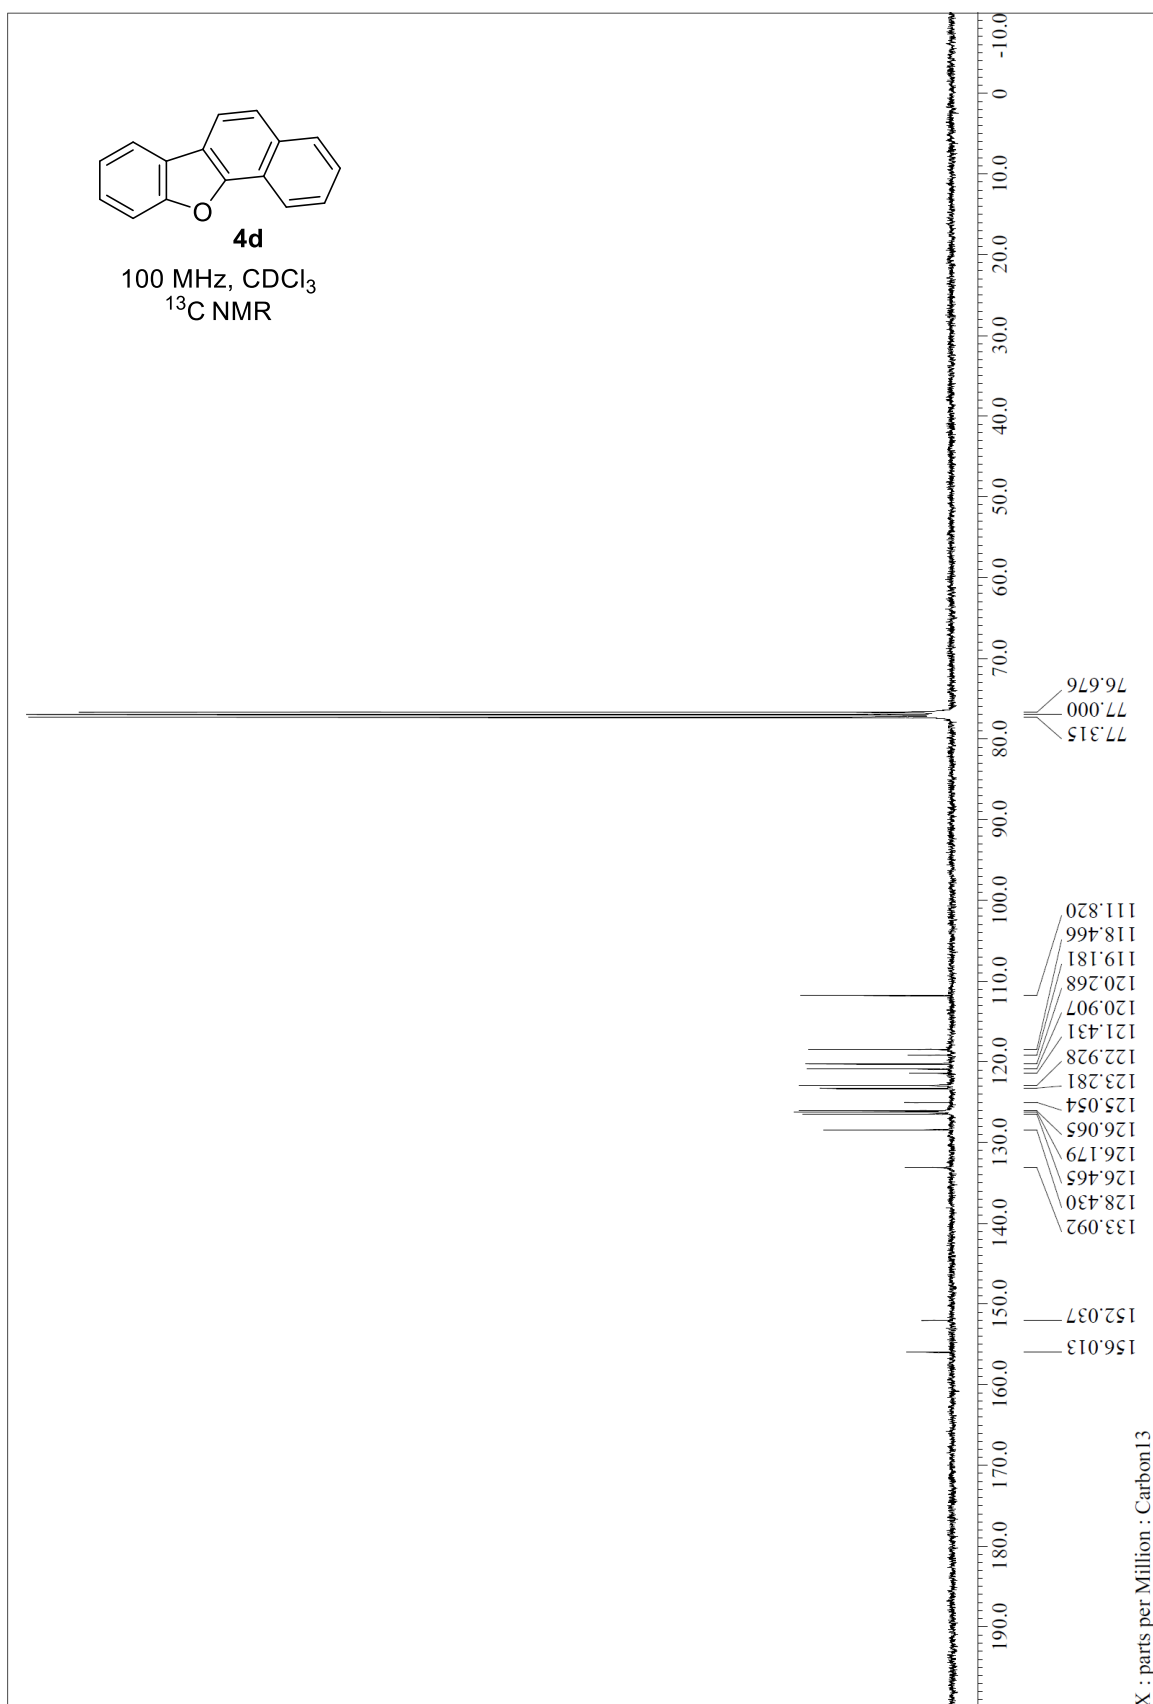

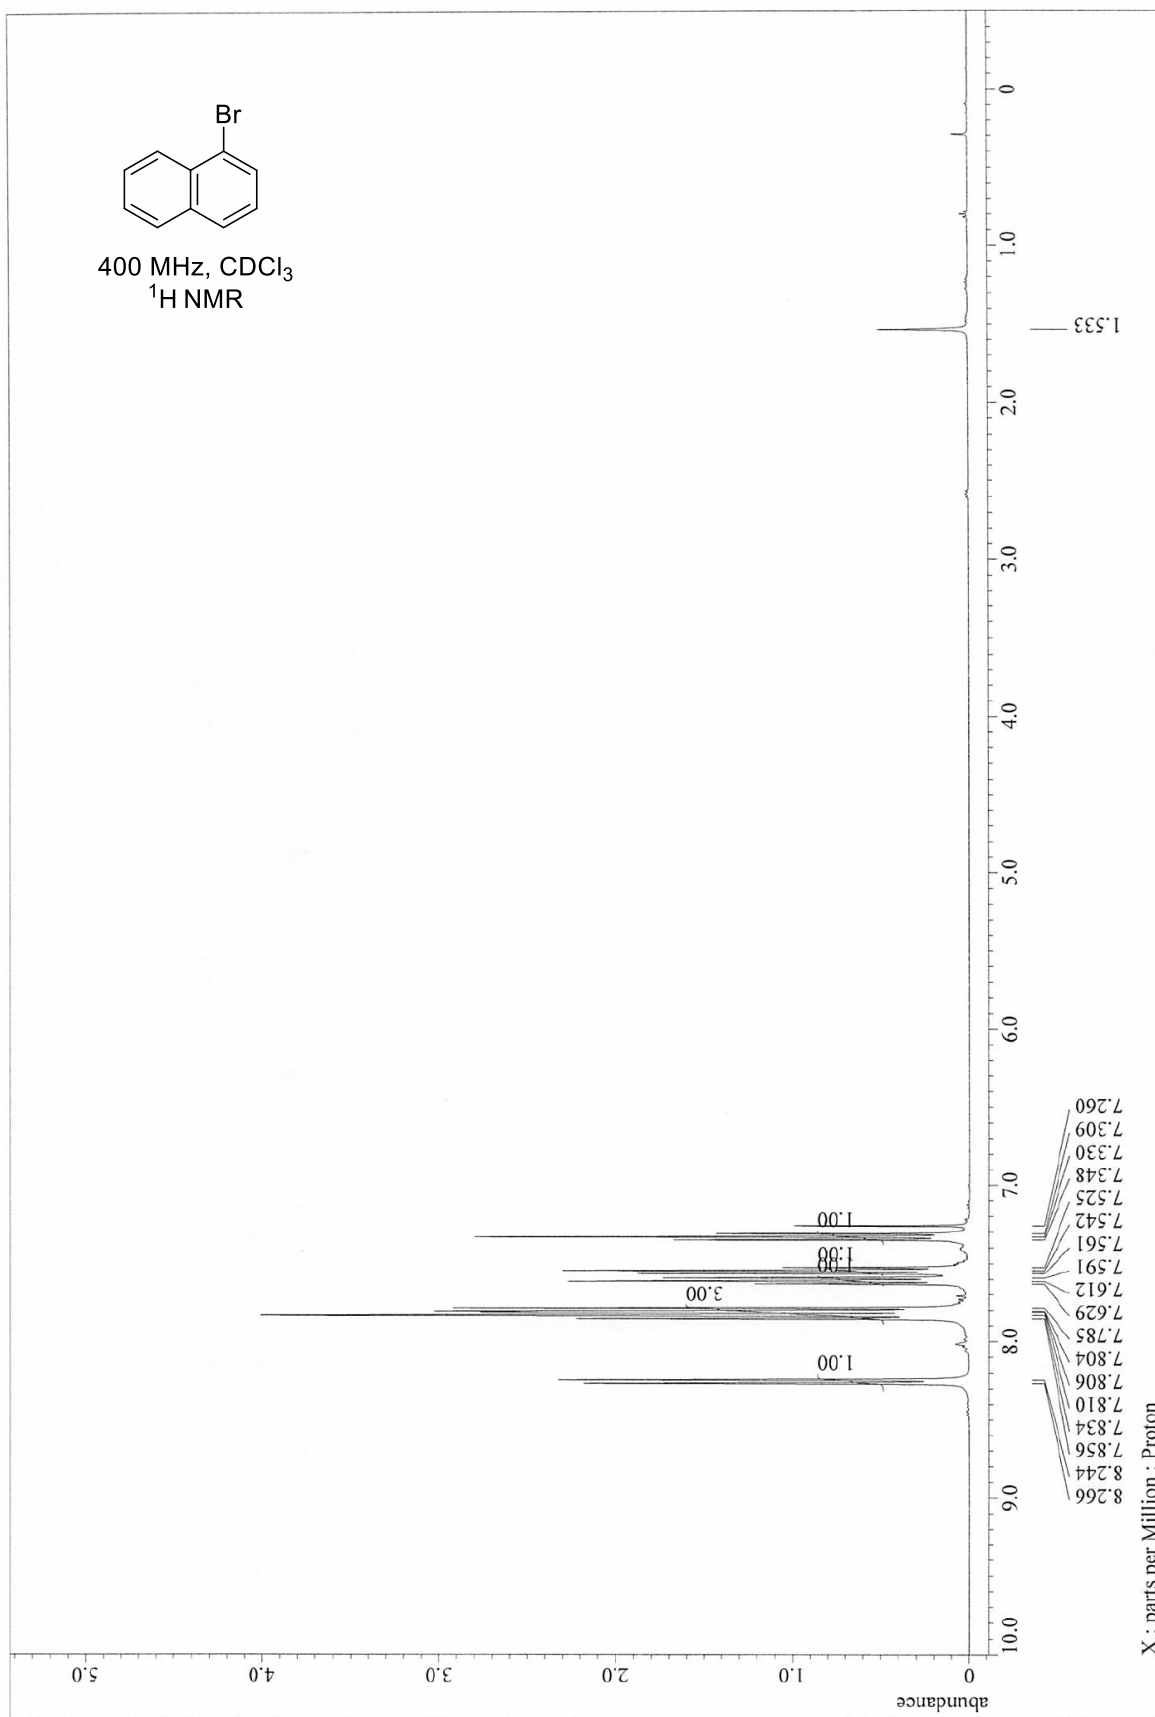

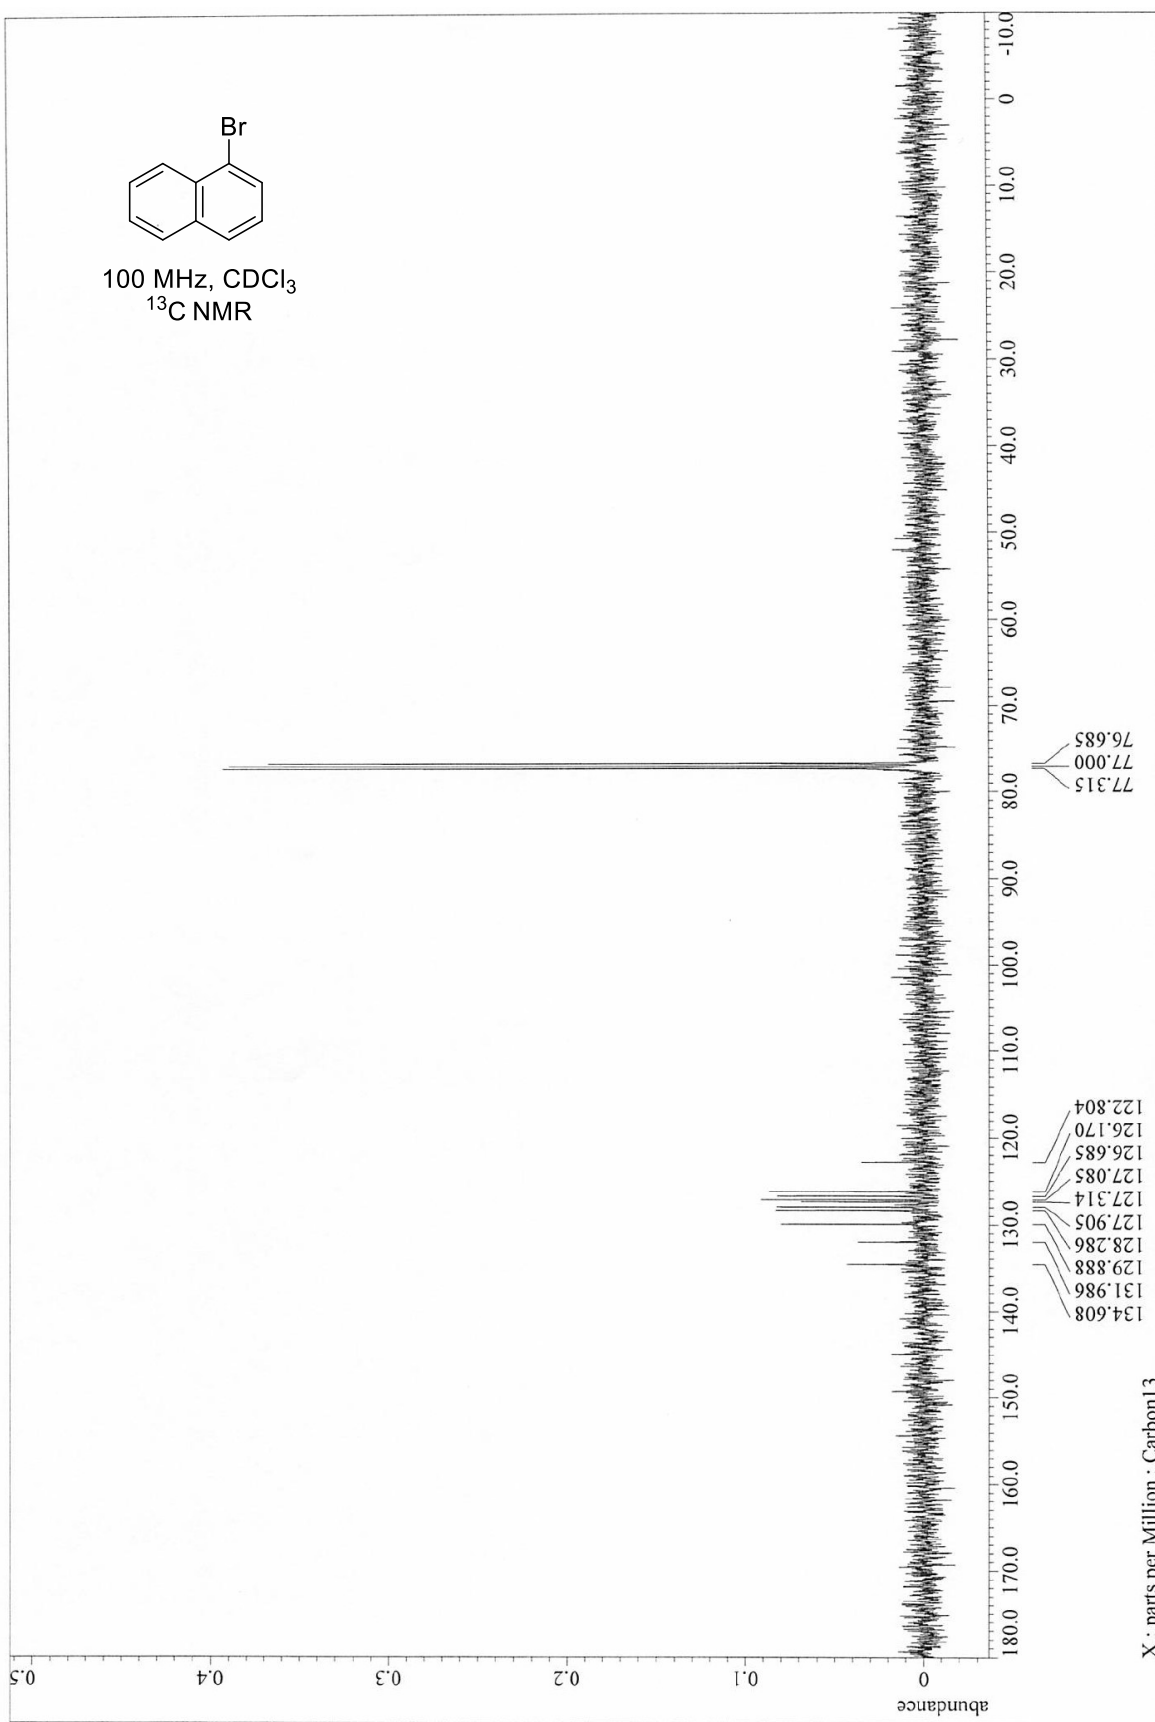

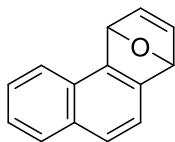

400 MHz, CDCl<sub>3</sub>  
<sup>1</sup>H NMR

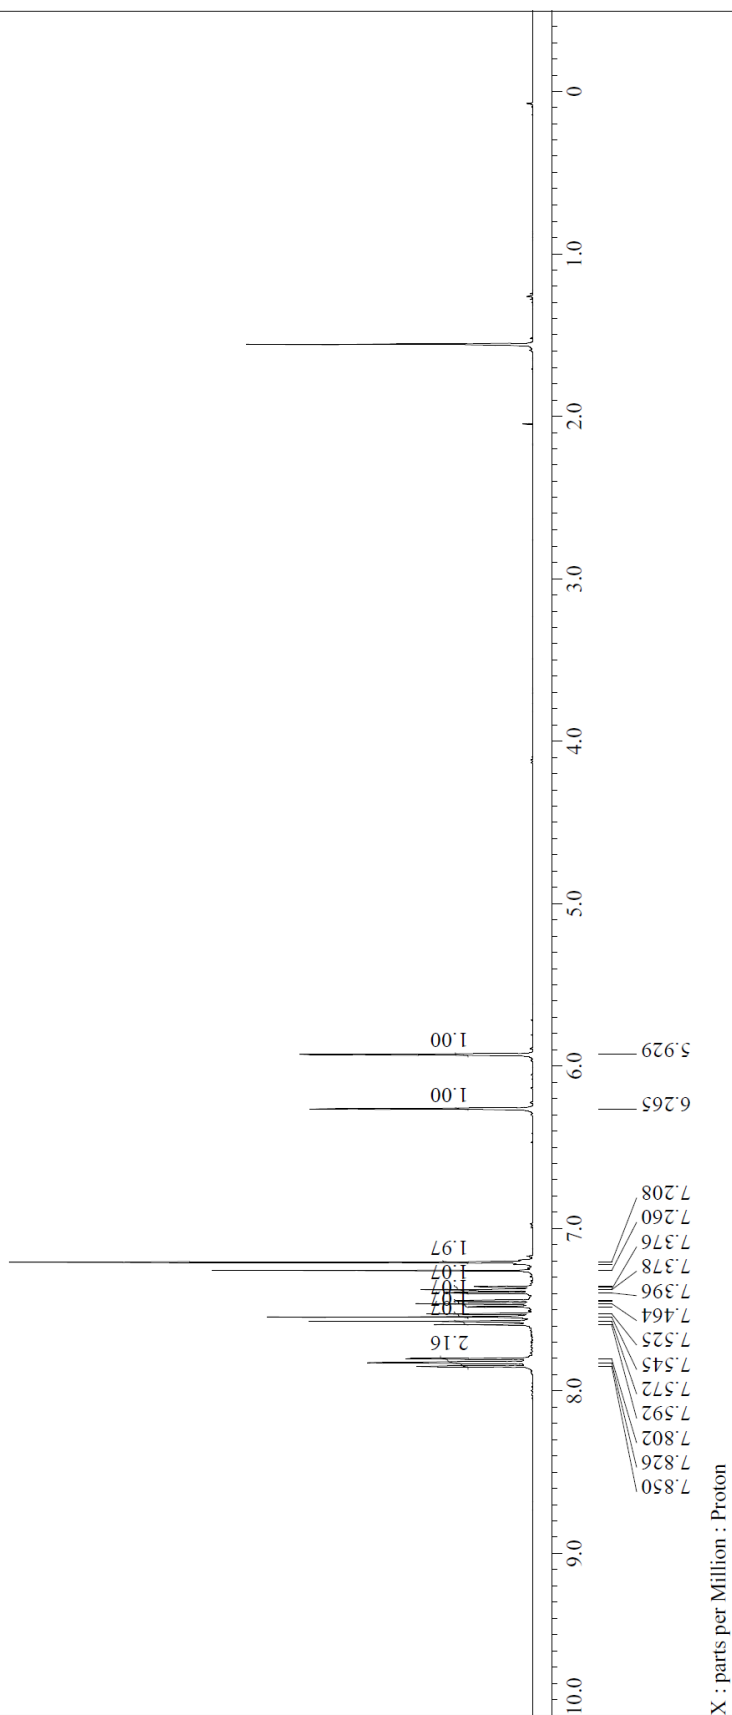

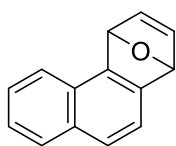

100 MHz, CDCl<sub>3</sub>  
<sup>13</sup>C NMR

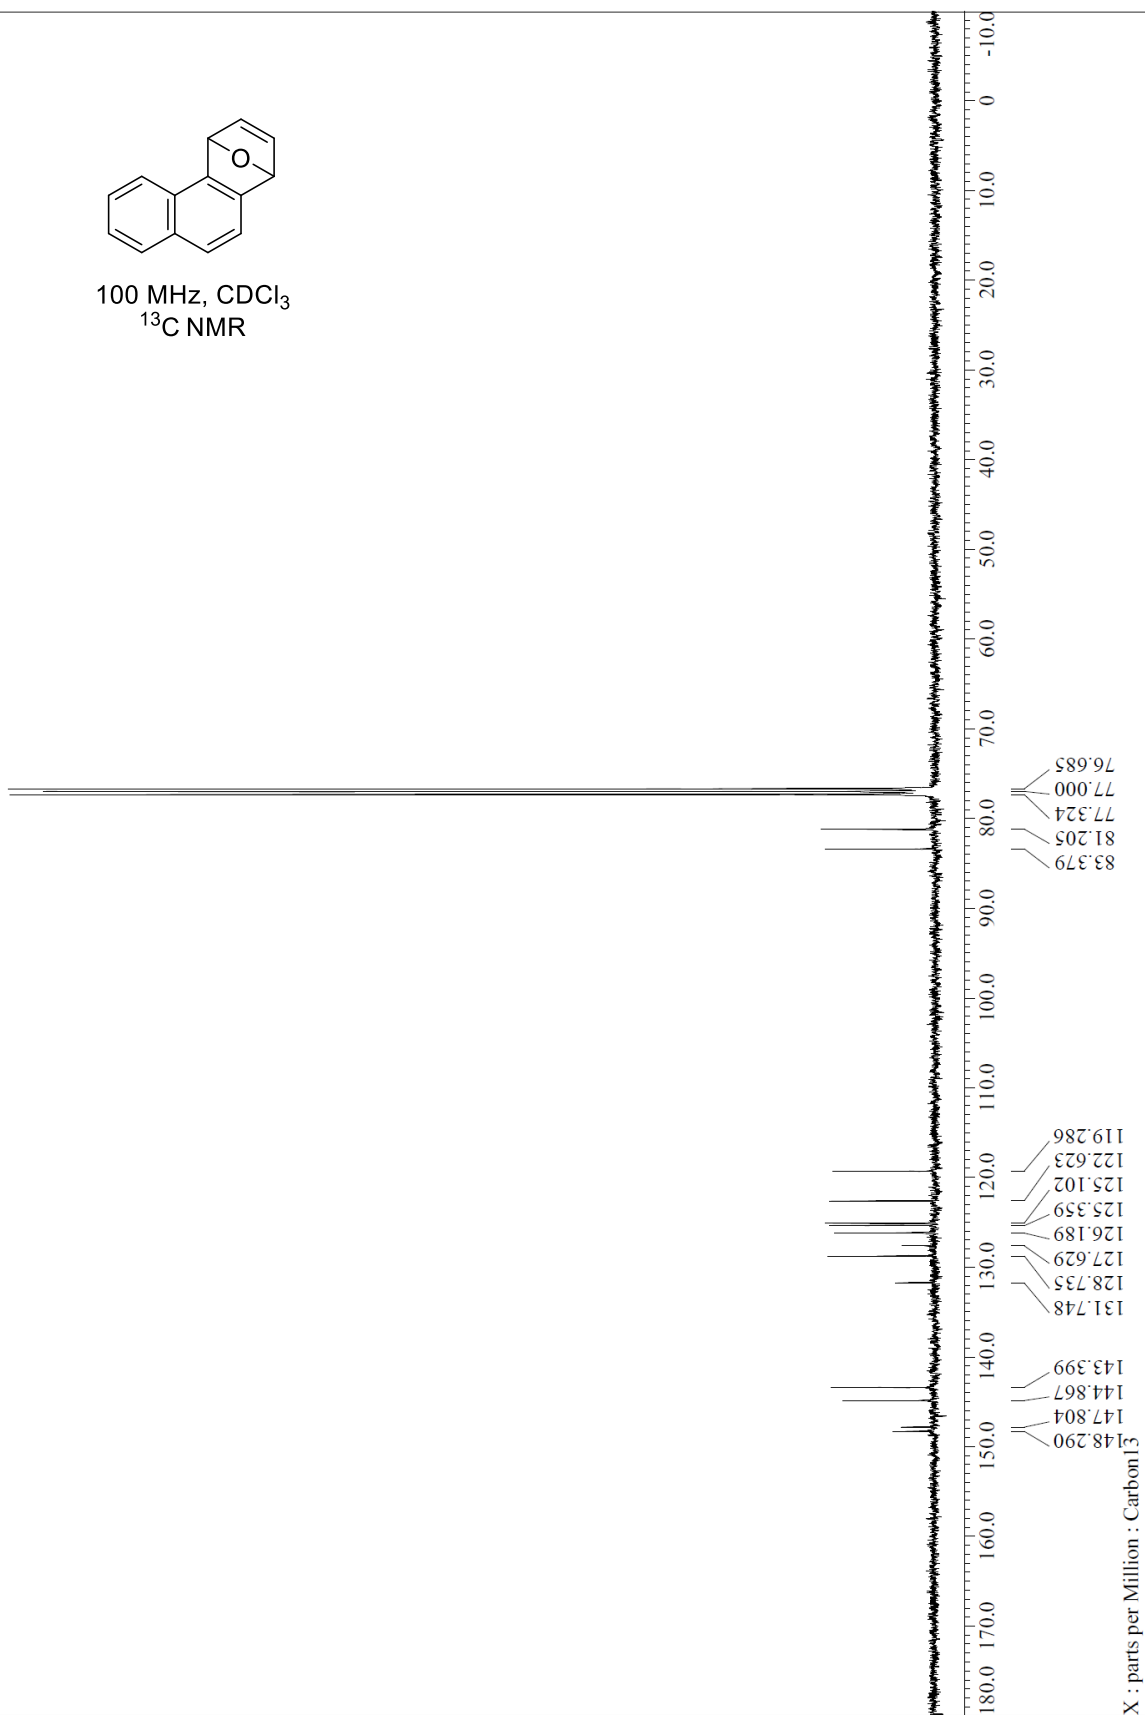

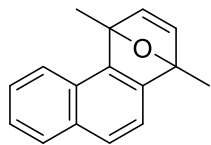

400 MHz, CDCl<sub>3</sub>  
<sup>1</sup>H NMR

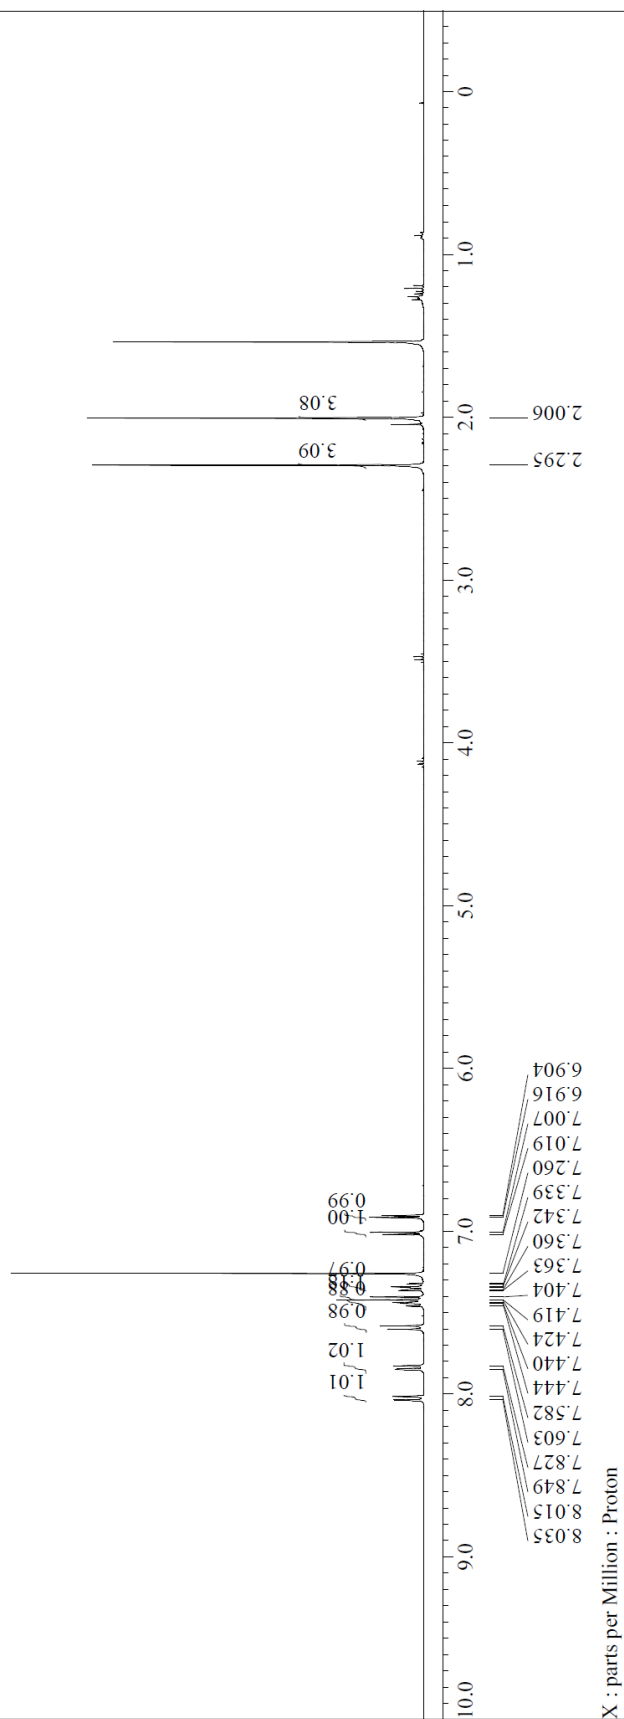



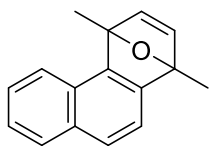

100 MHz, CDCl<sub>3</sub>  
<sup>13</sup>C NMR

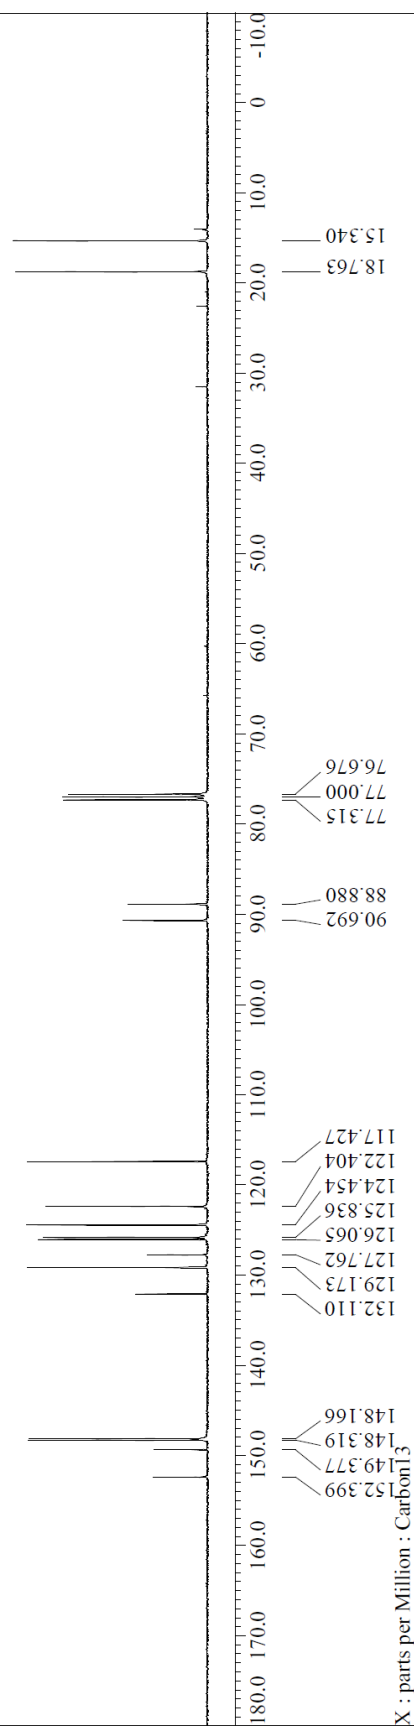

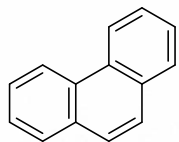

**4e**  
400 MHz, CDCl<sub>3</sub>  
<sup>1</sup>H NMR

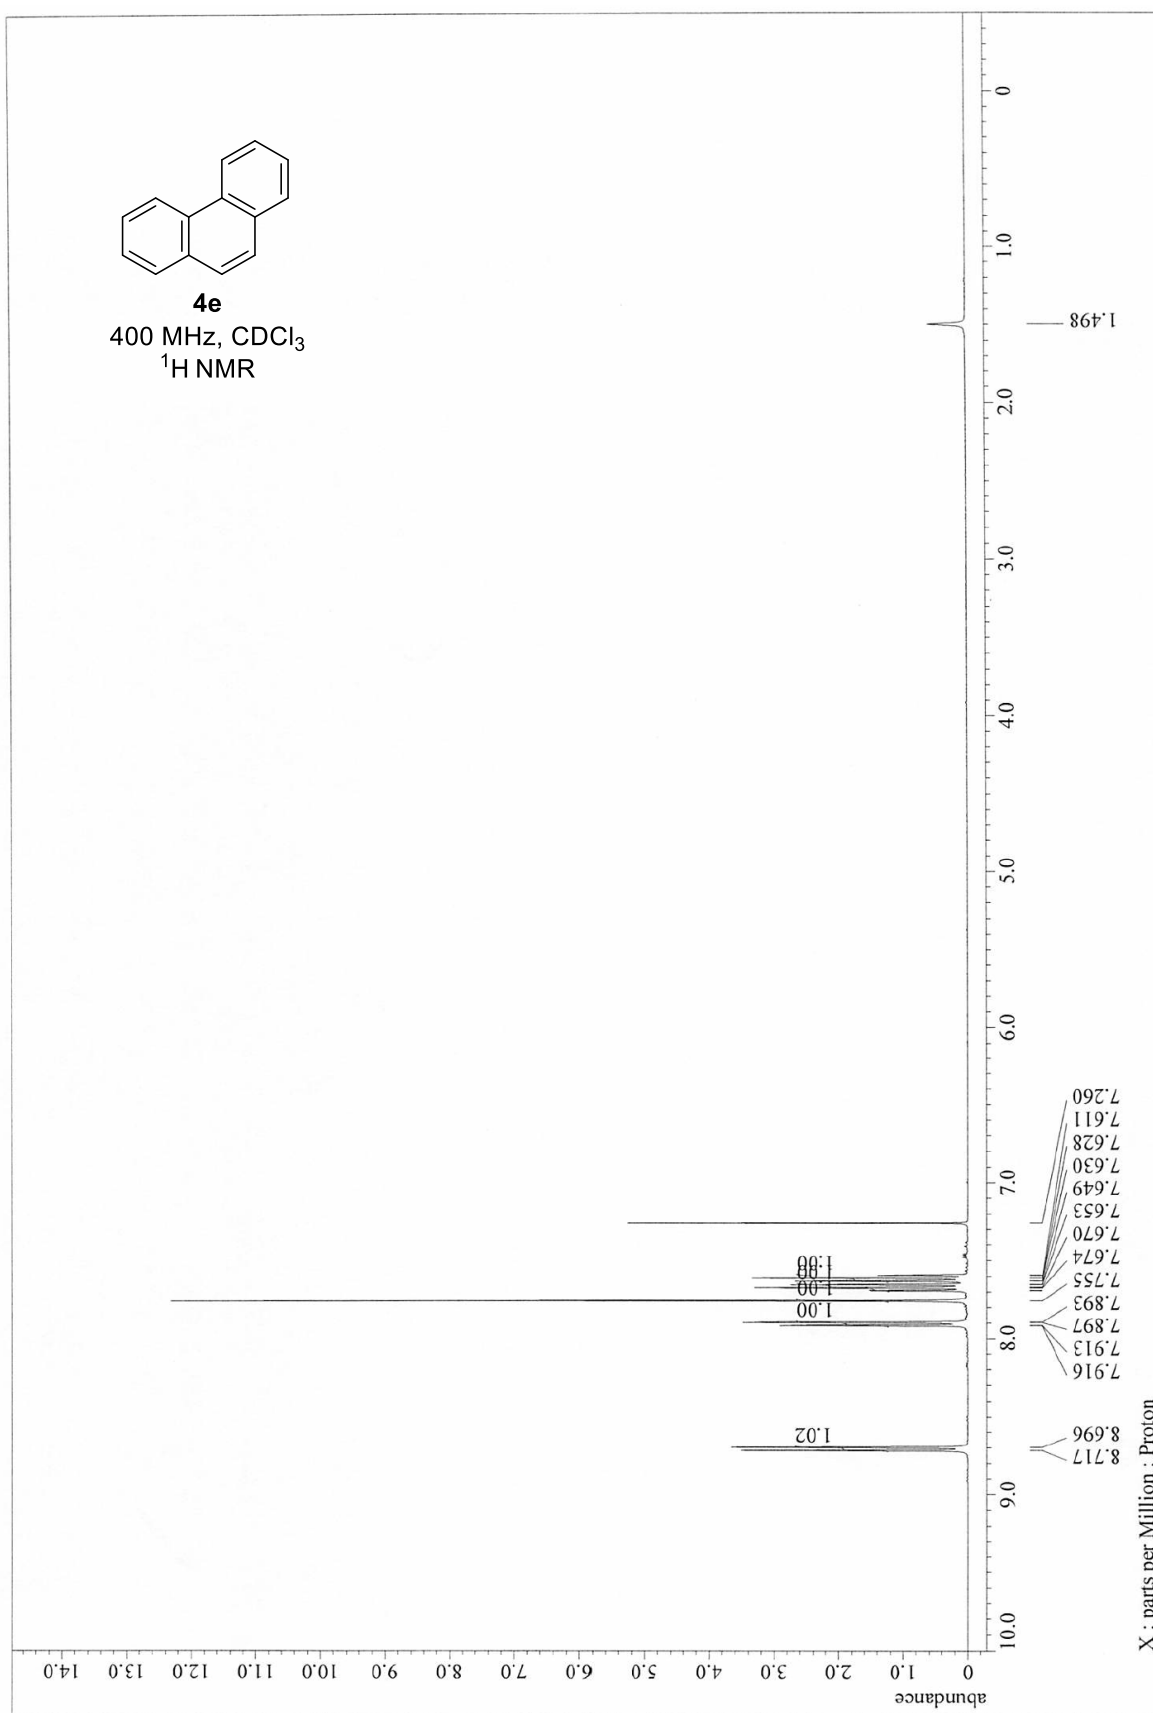

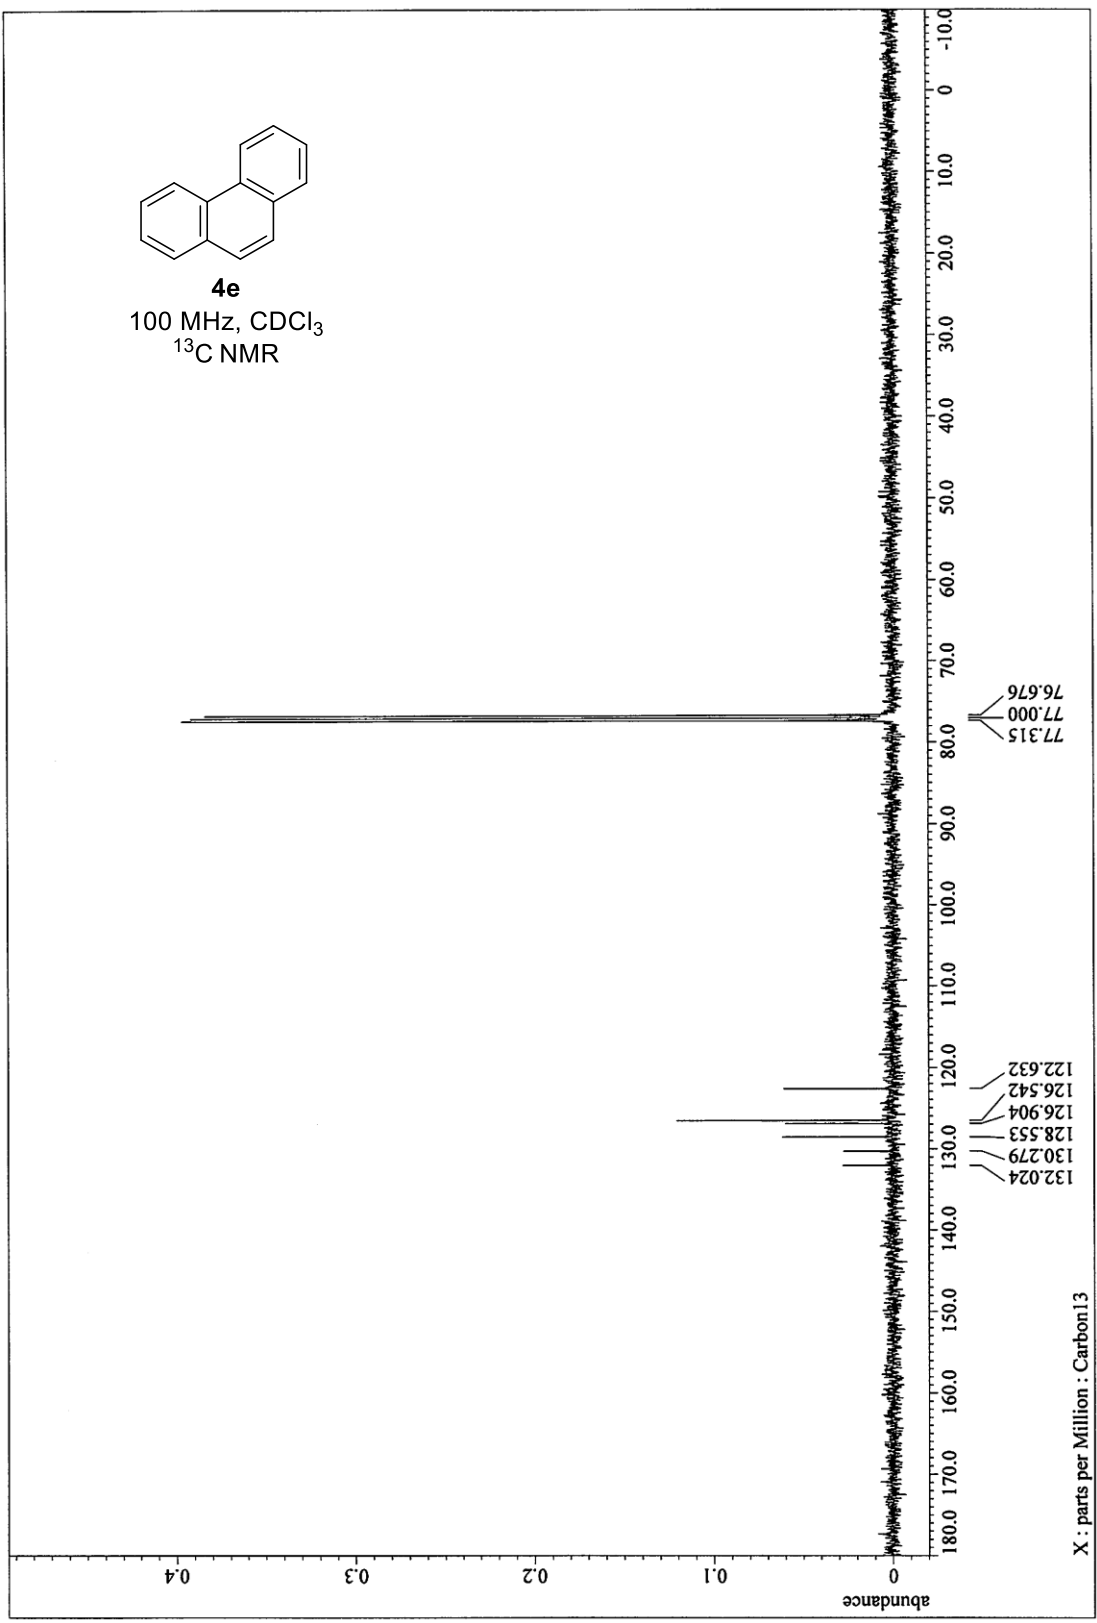

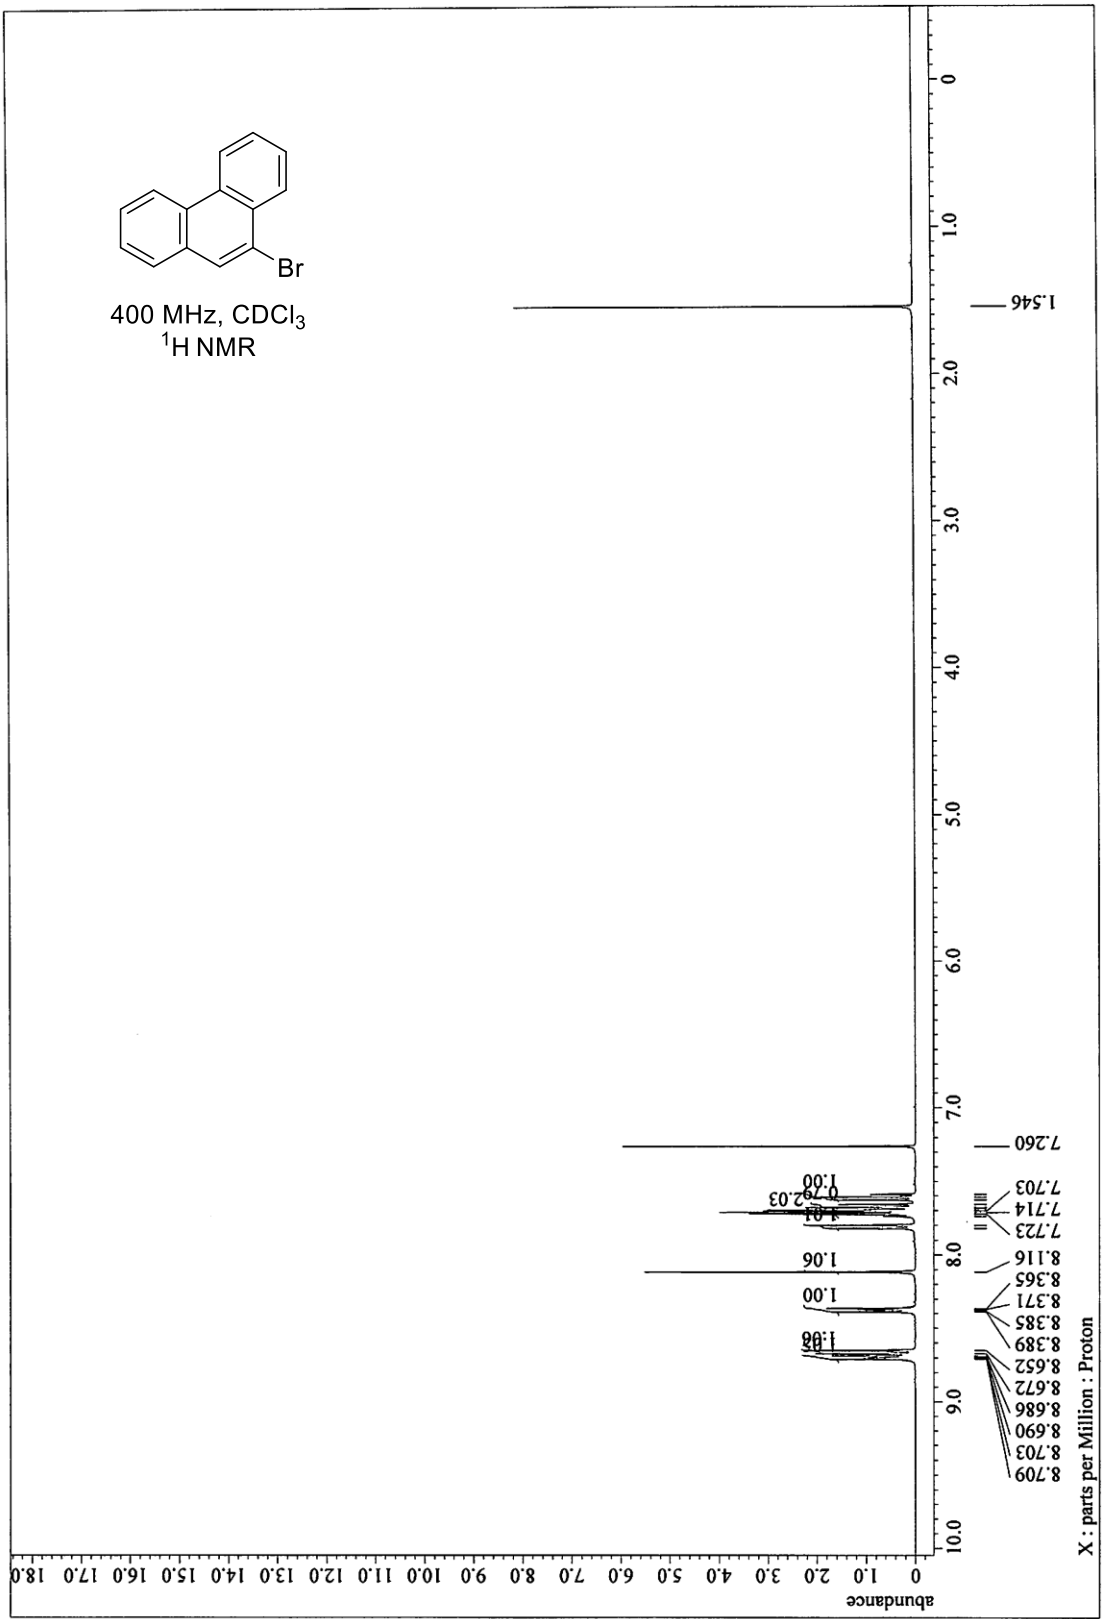

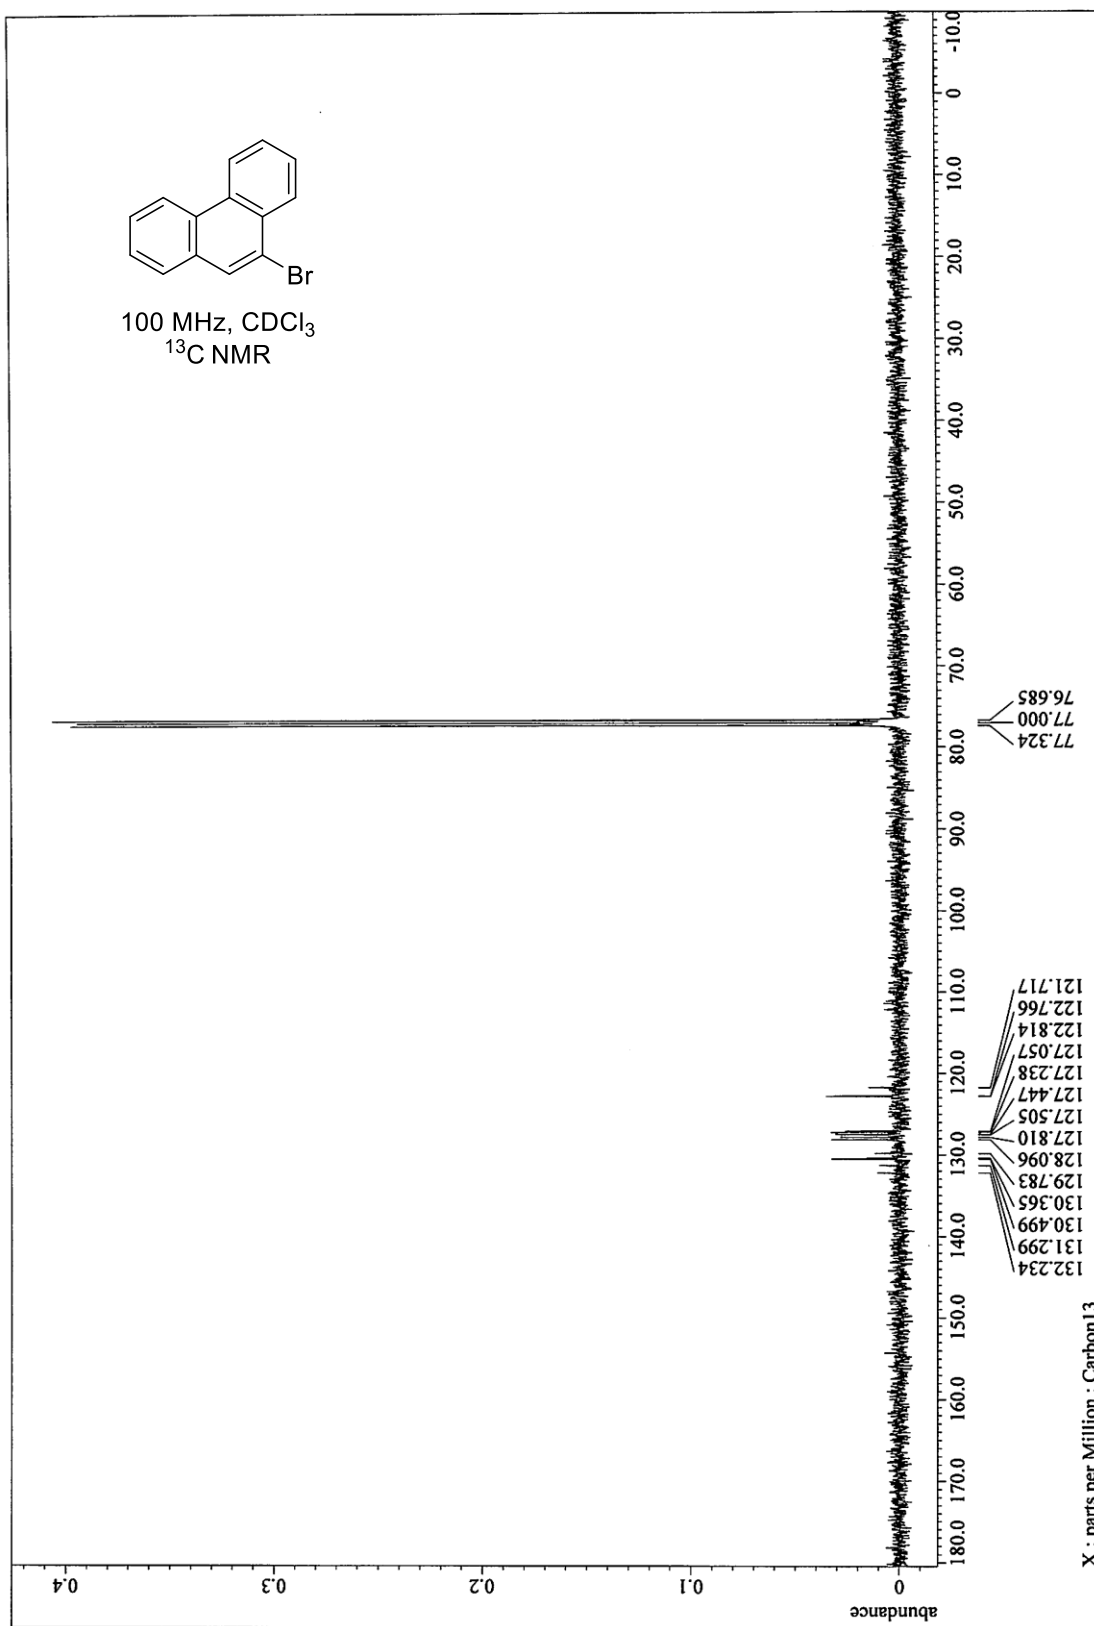

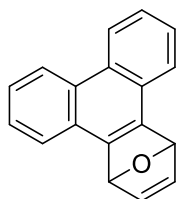

400 MHz, CDCl<sub>3</sub>  
<sup>1</sup>H NMR

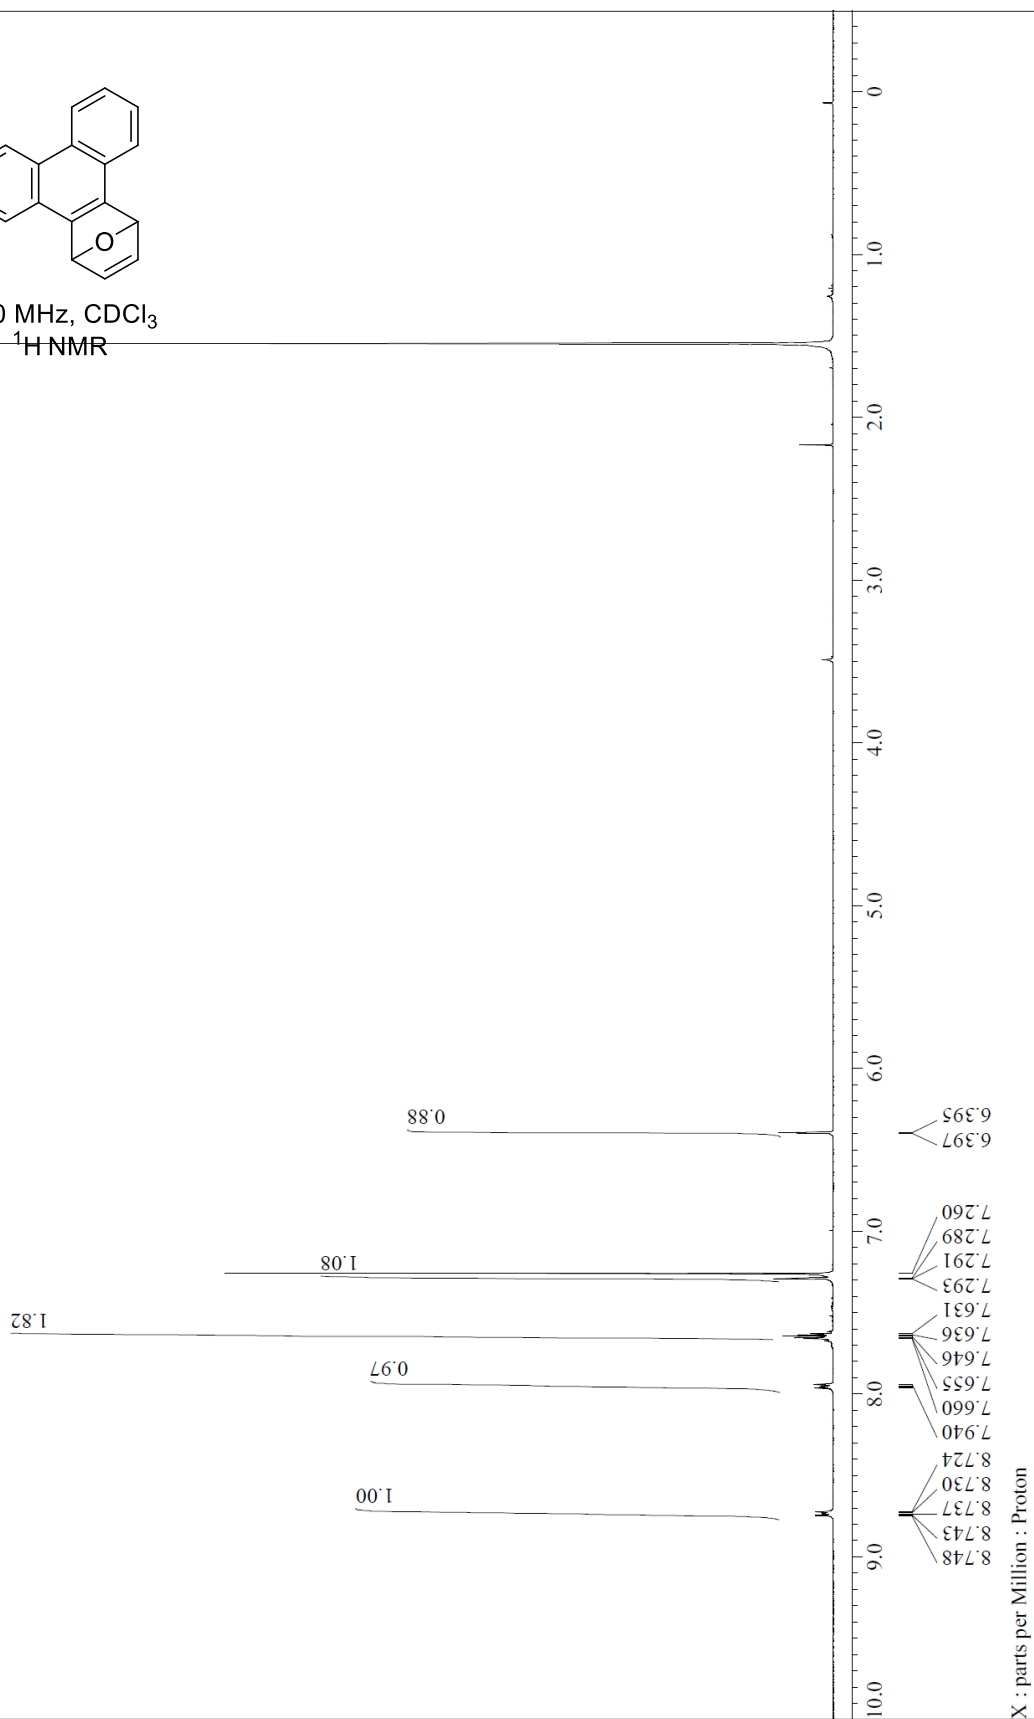

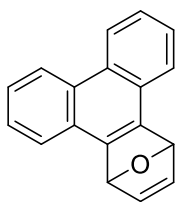

100 MHz, CDCl<sub>3</sub>  
<sup>13</sup>C NMR

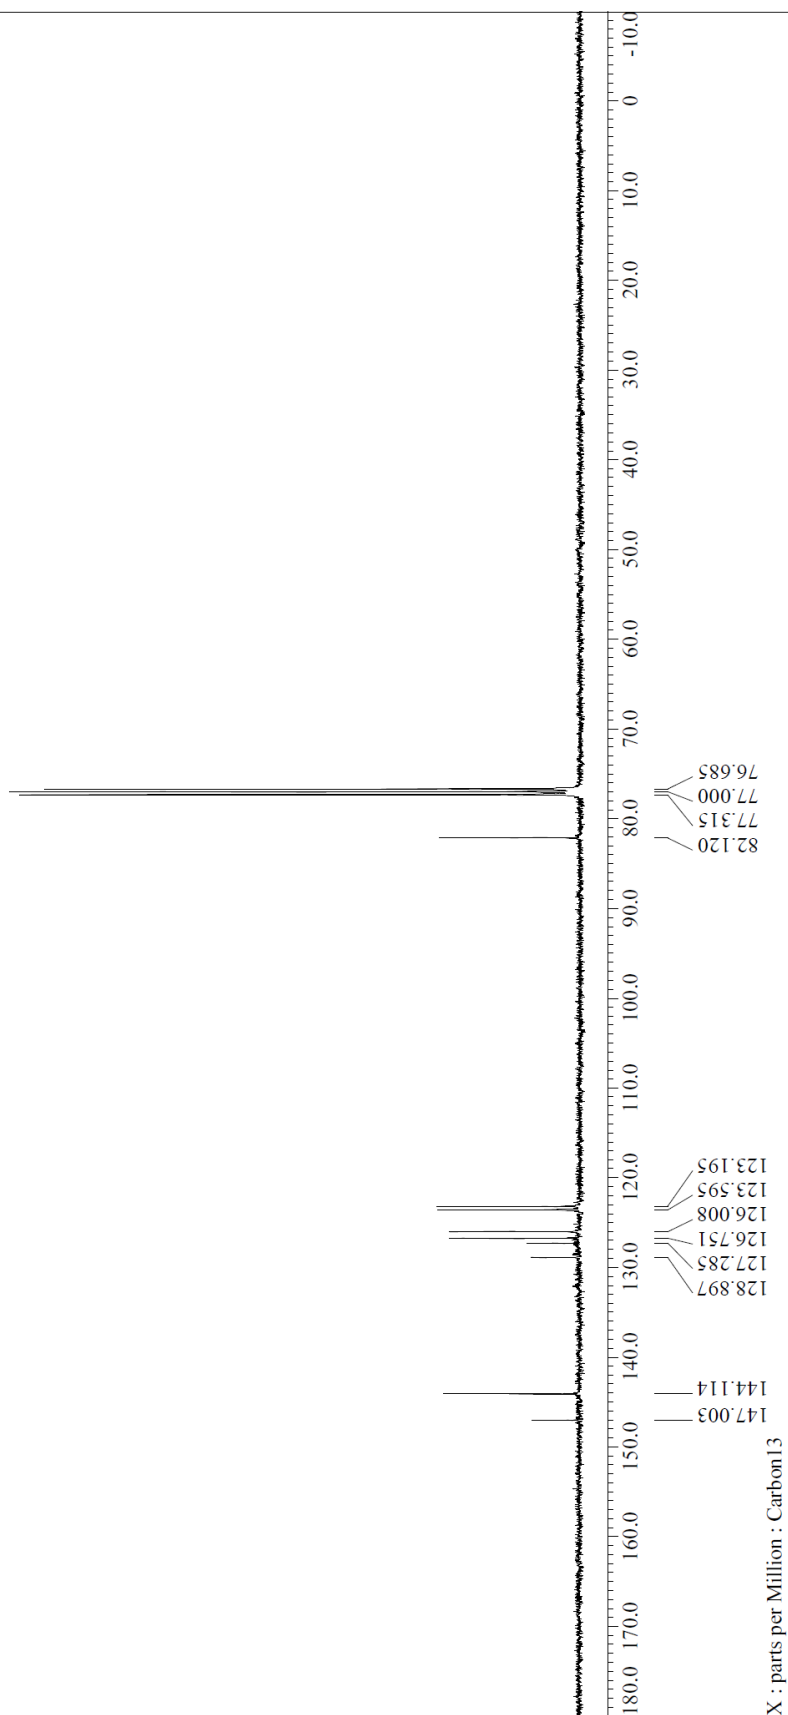

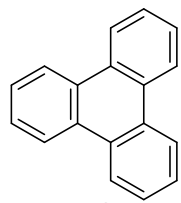

4f

400 MHz, CDCl<sub>3</sub>  
<sup>1</sup>H NMR

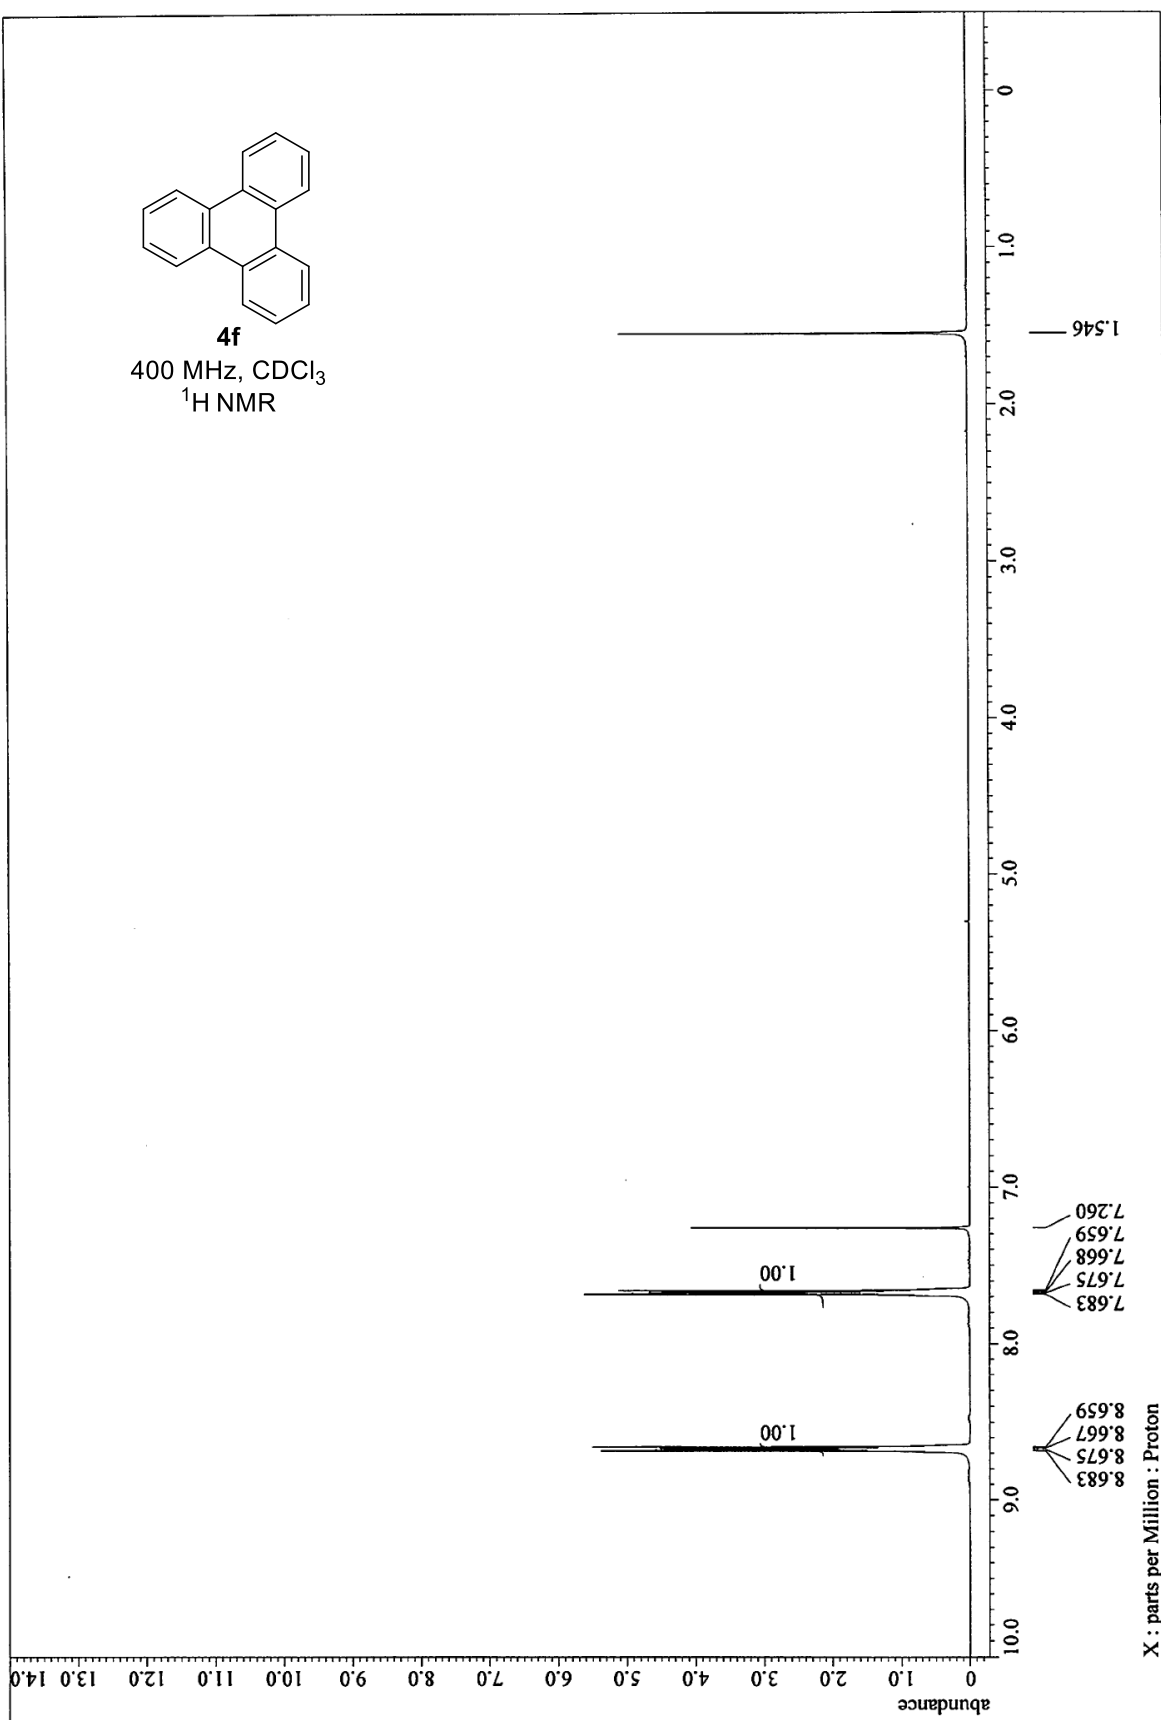



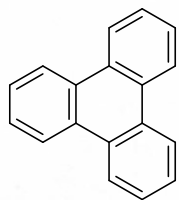

**4f**

100 MHz, CDCl<sub>3</sub>  
<sup>13</sup>C NMR

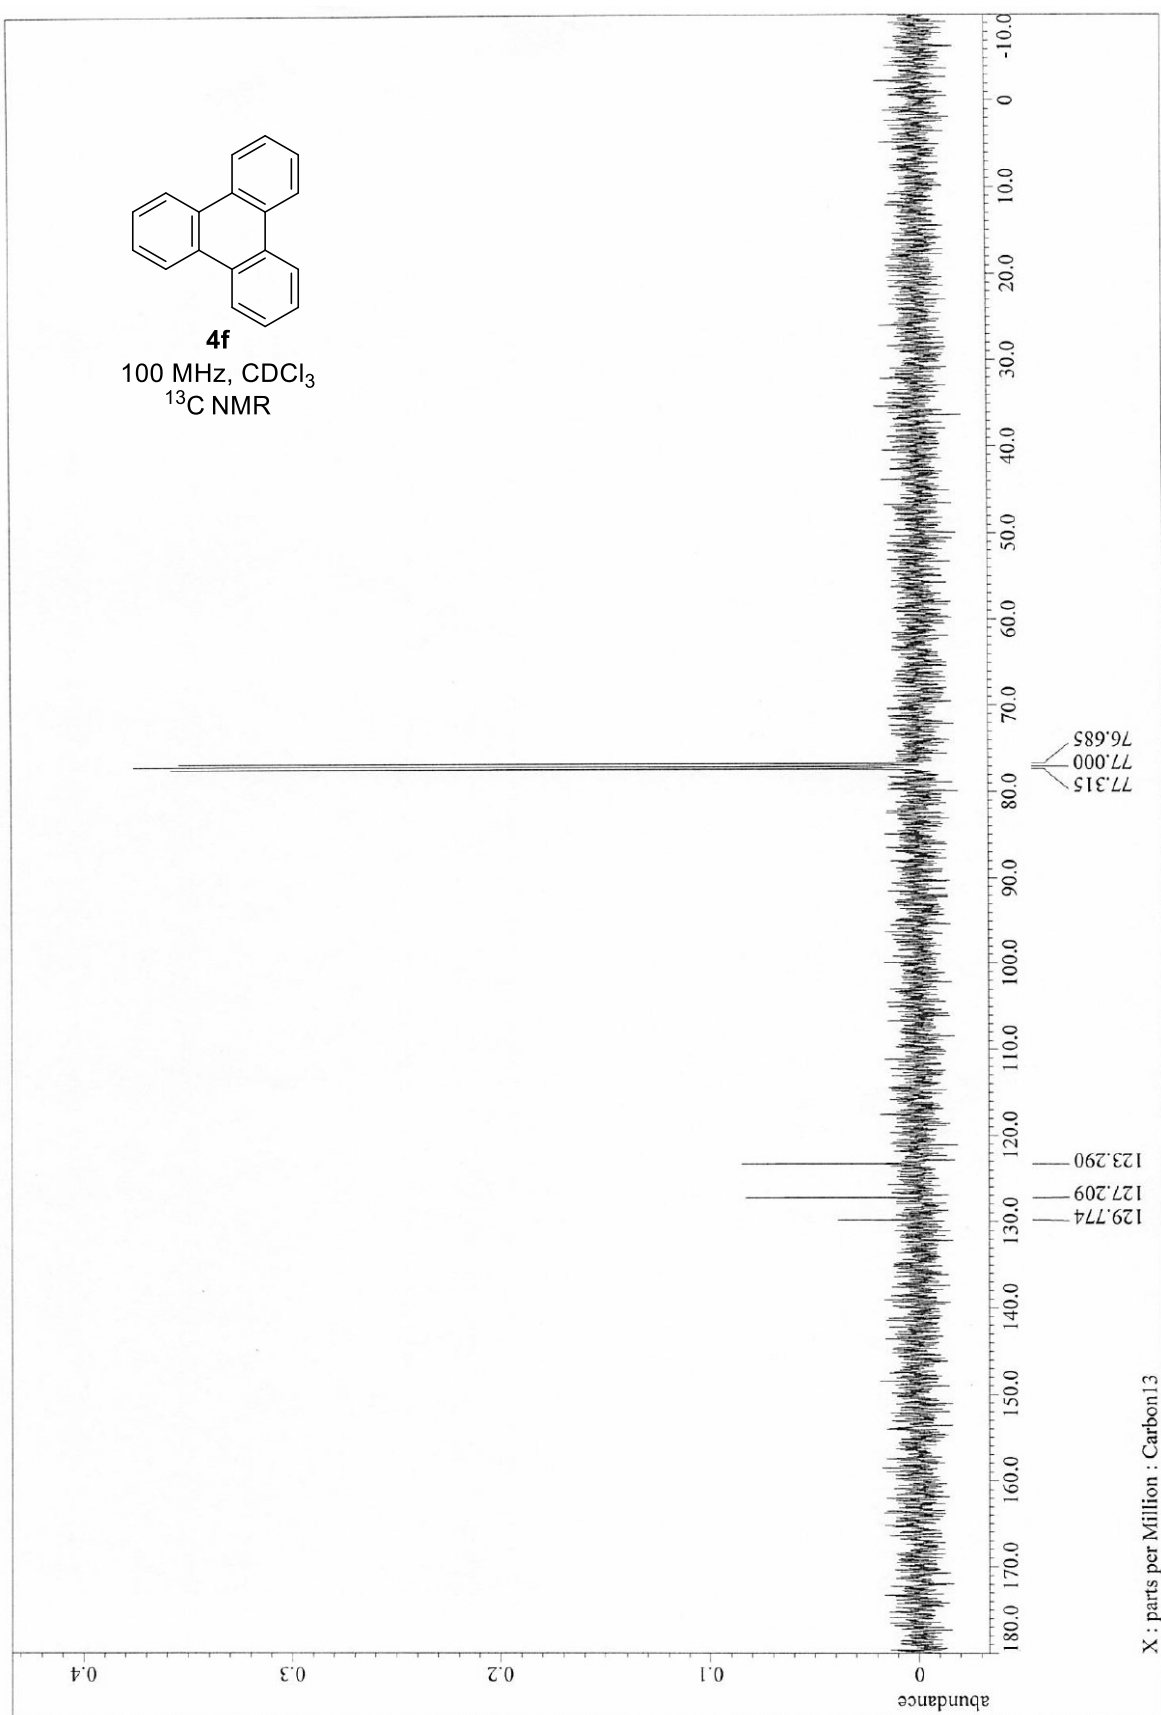

Supplement: c9cc00270g1.pdf [file c9cc00270g1.pdf]
